# Supplementary material for: Synthesis of functionalized dispiro-oxindoles through azomethine ylide dimerization and mechanistic studies to explain the diastereoselectivity
Source: Royal Society of Chemistry journal article supplement (doi:10.1039/c4ra01492h), 2014-01-01
Supplement: c4ra01492h1.pdf [file c4ra01492h1.pdf]

## Supporting Information

### Content:

| List of contents          | Page | List of contents          | Page |
|---------------------------|------|---------------------------|------|
| <sup>1</sup> H NMR of 8   | 2    | <sup>13</sup> C NMR of 14 | 15   |
| <sup>13</sup> C NMR of 8  | 3    | <sup>1</sup> H NMR of 15  | 16   |
| <sup>1</sup> H NMR of 9   | 4    | <sup>13</sup> C NMR of 15 | 17   |
| <sup>13</sup> C NMR of 9  | 5    | <sup>1</sup> H NMR of 16  | 18   |
| <sup>1</sup> H NMR of 10  | 6    | <sup>13</sup> C NMR of 16 | 19   |
| <sup>13</sup> C NMR of 10 | 7    | <sup>1</sup> H NMR of 17  | 20   |
| <sup>1</sup> H NMR of 11  | 8    | <sup>13</sup> C NMR of 17 | 21   |
| <sup>13</sup> C NMR of 11 | 9    | <sup>1</sup> H NMR of 18  | 22   |
| <sup>1</sup> H NMR of 12  | 10   | <sup>13</sup> C NMR of 18 | 23   |
| <sup>13</sup> C NMR of 12 | 11   |                           |      |
| <sup>1</sup> H NMR of 13  | 12   | X-Ray Data                | 24   |
| <sup>13</sup> C NMR of 13 | 13   |                           |      |
| <sup>1</sup> H NMR of 14  | 14   | DFT Data                  | 30   |

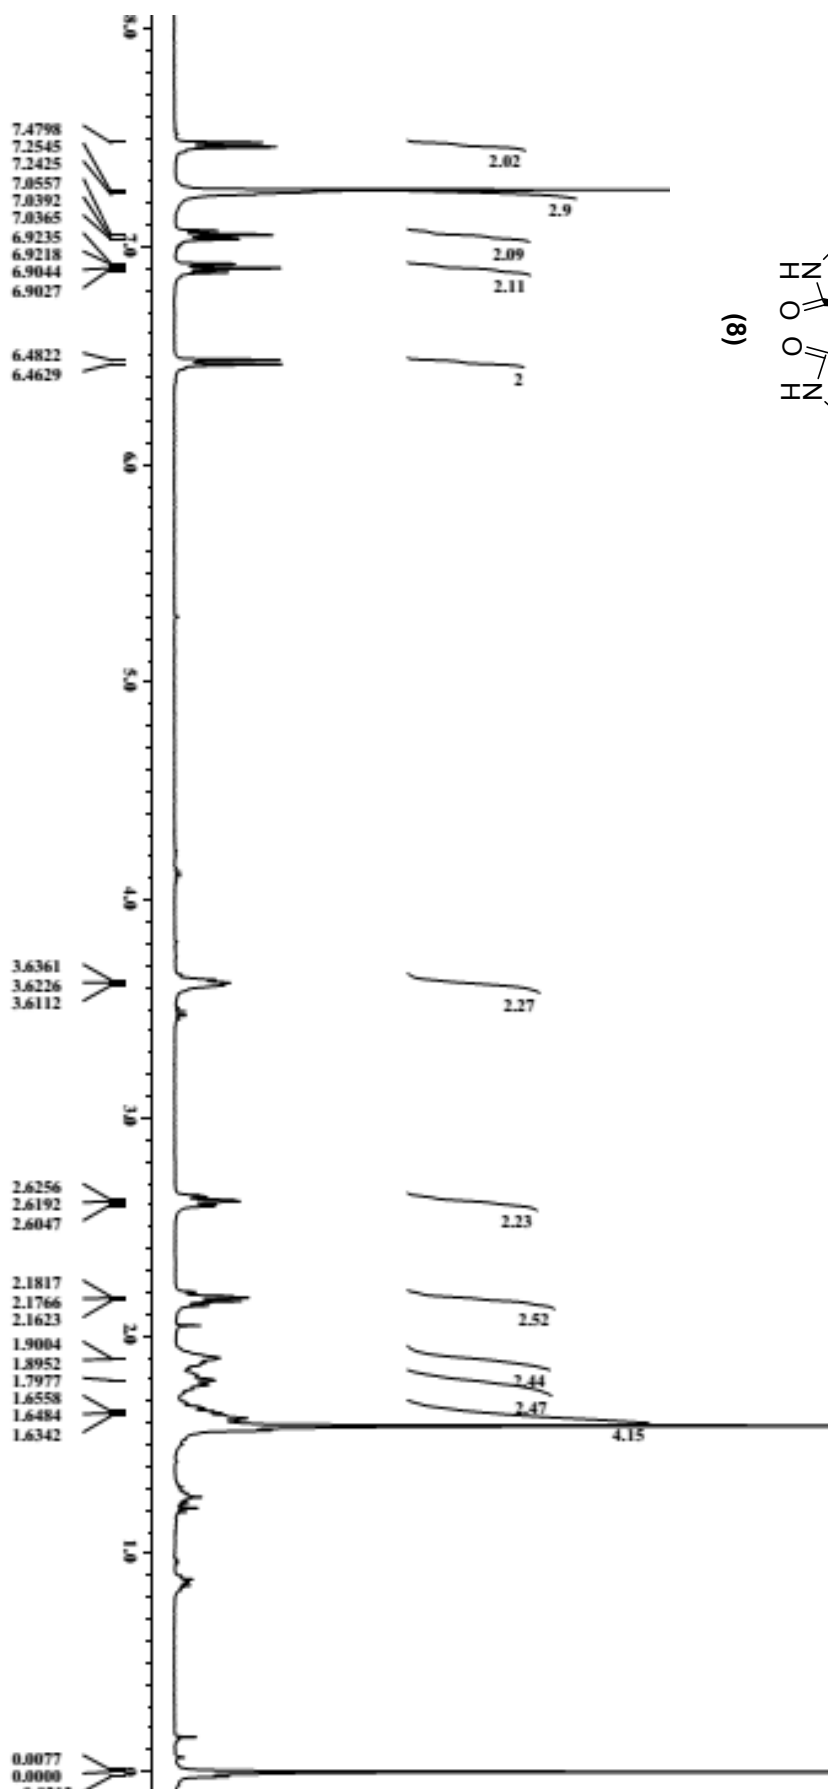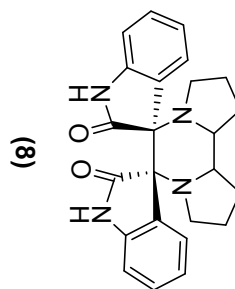

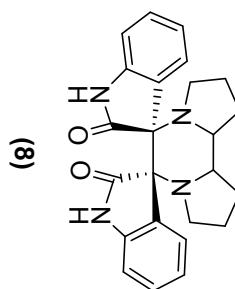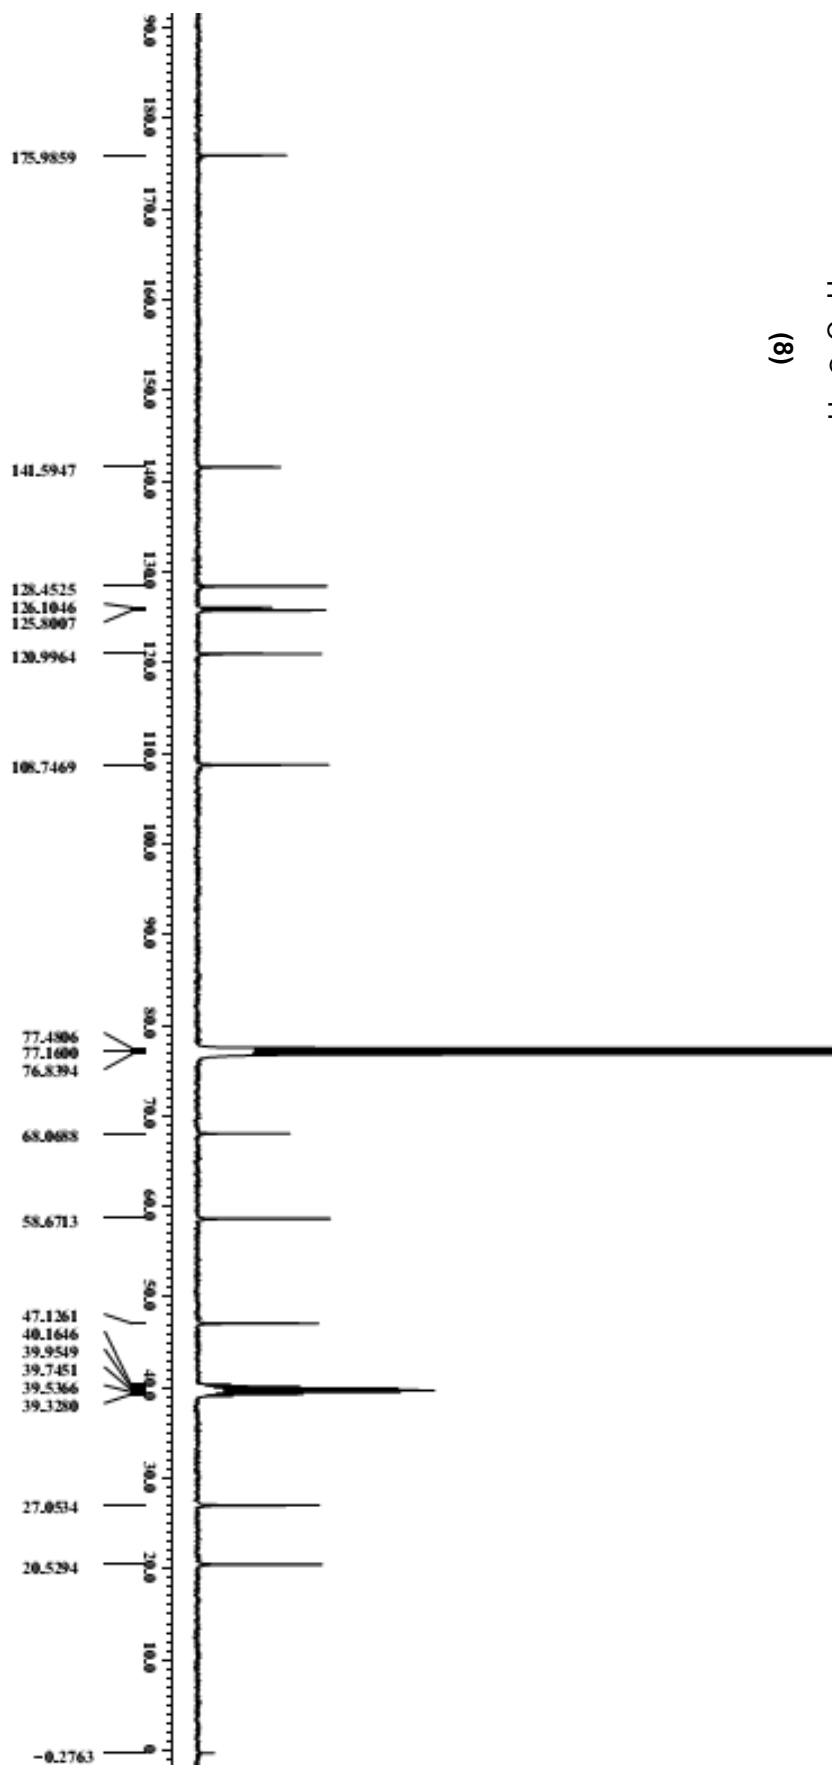

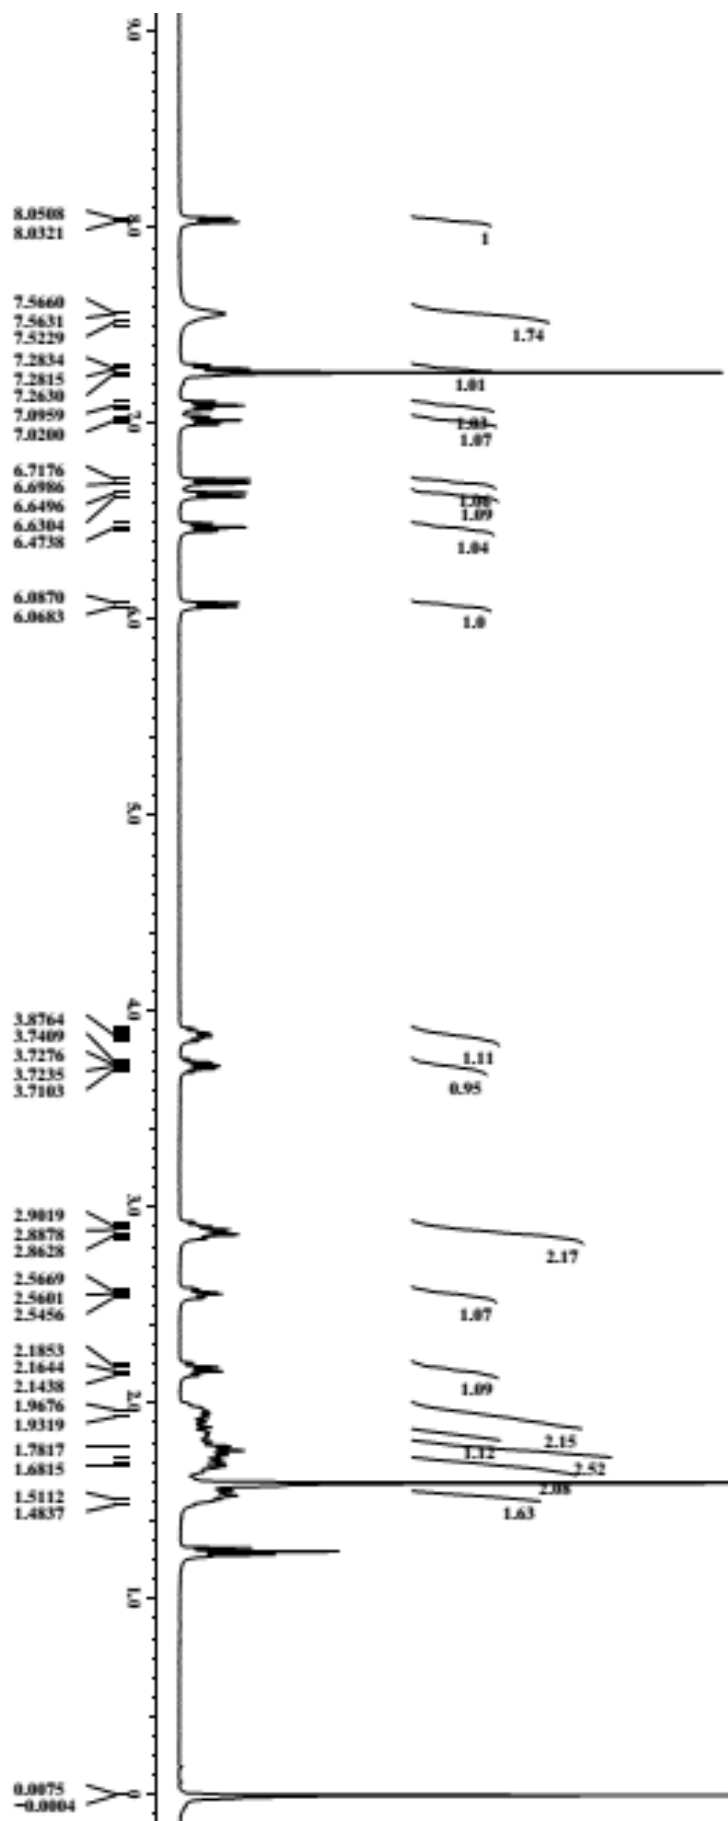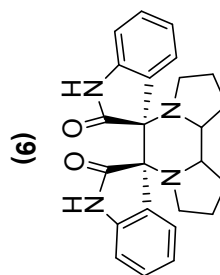

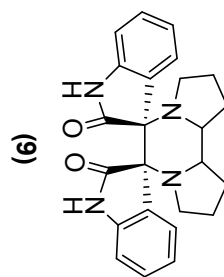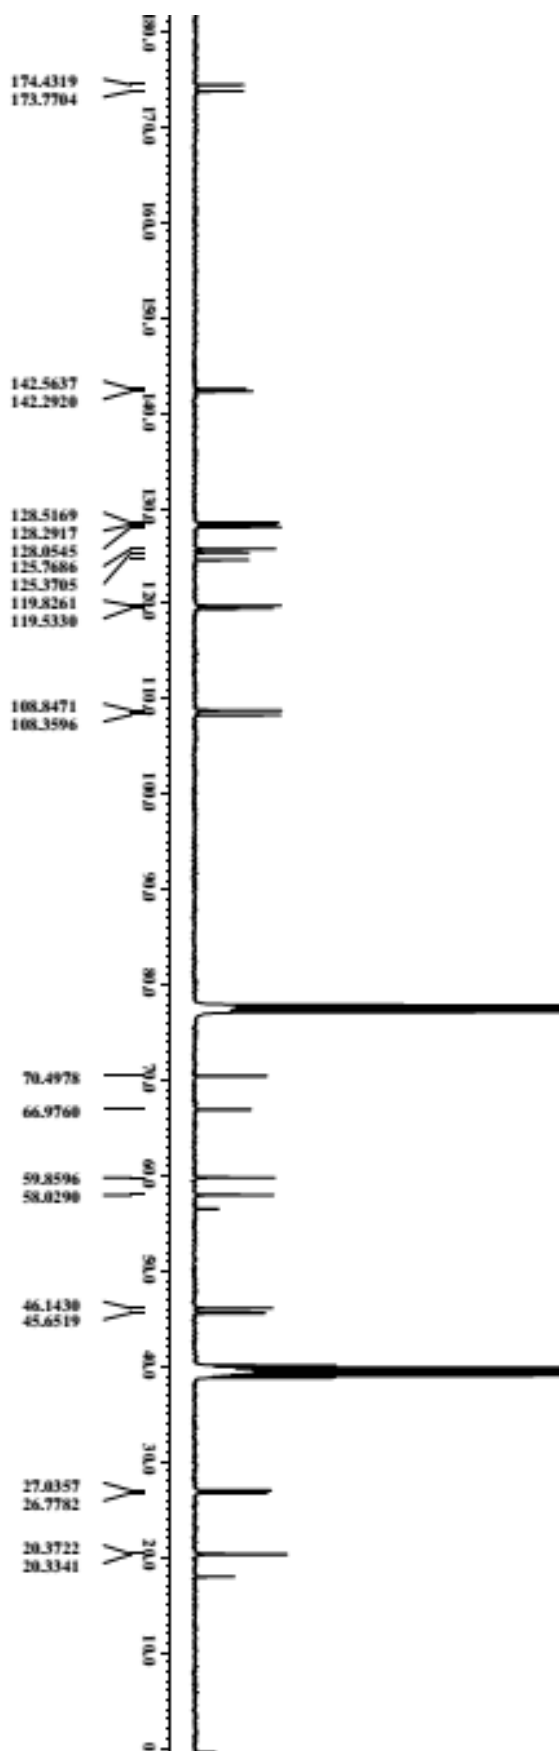

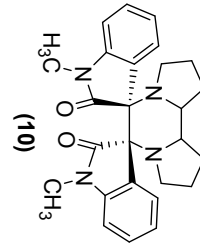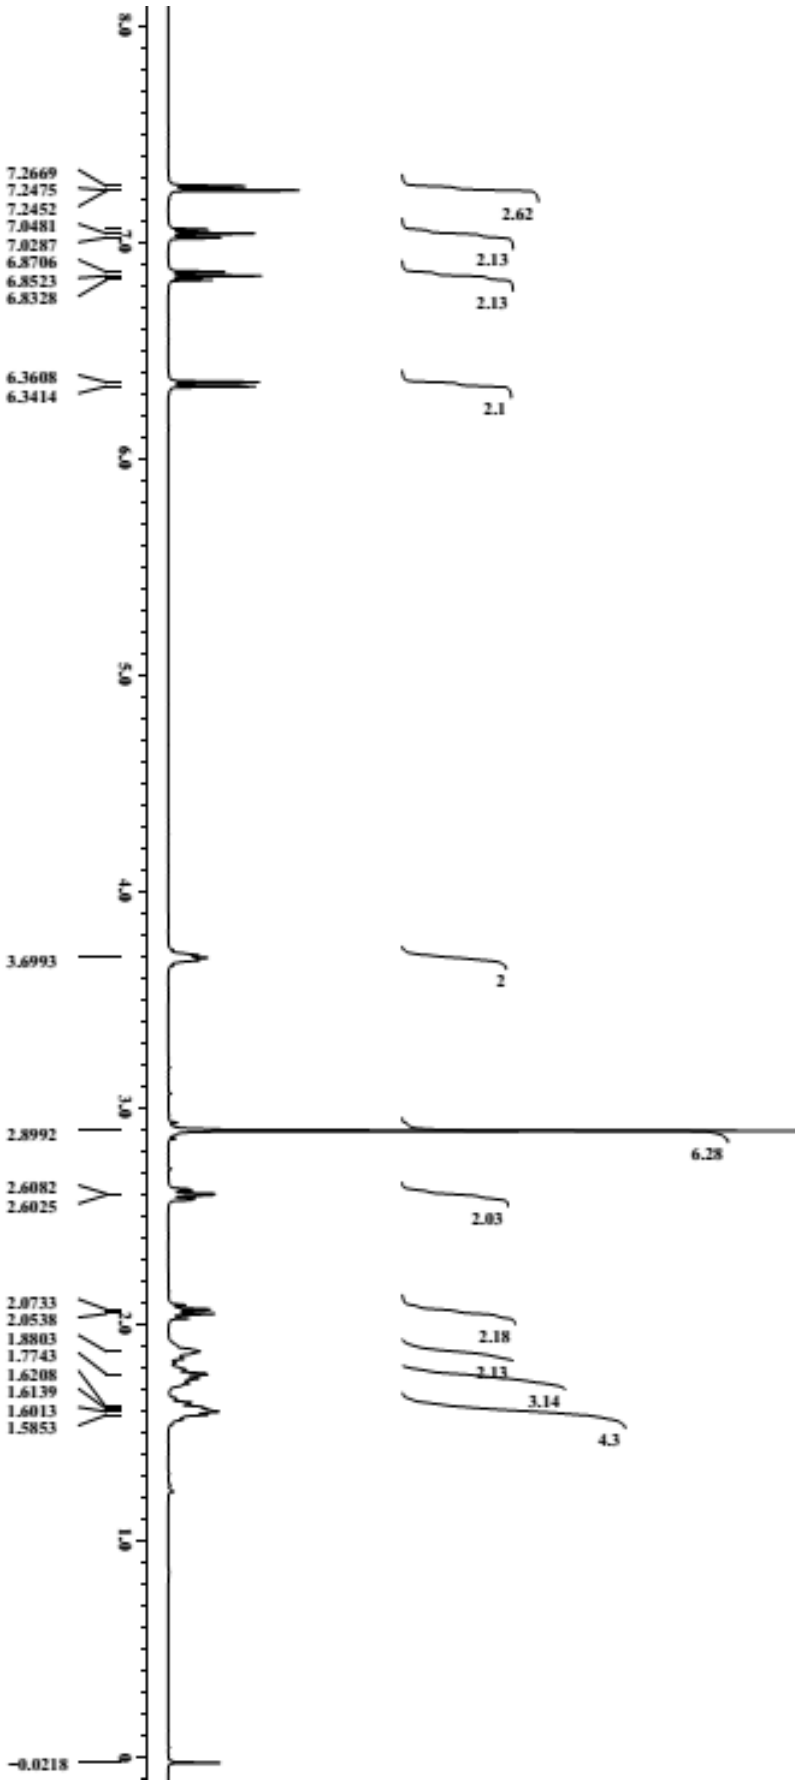

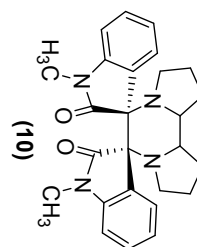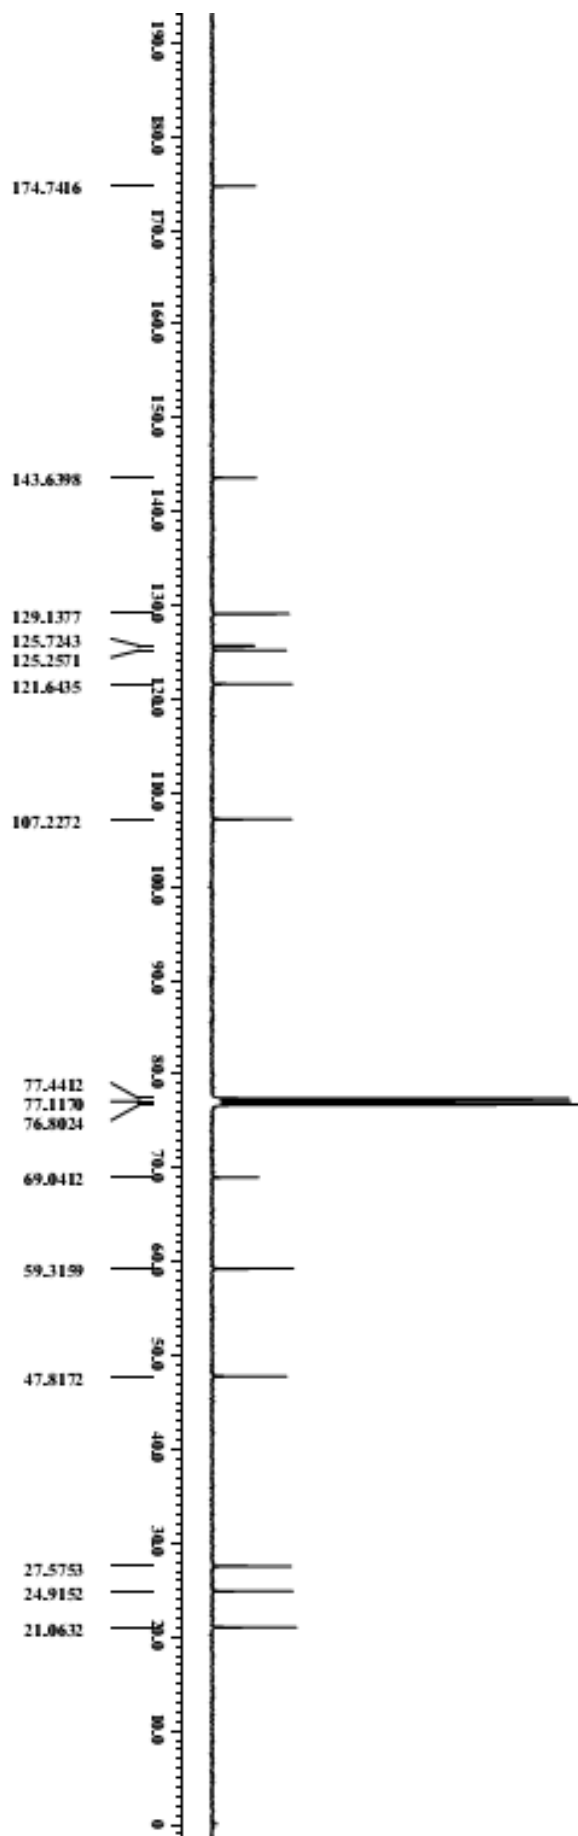

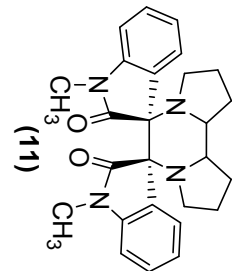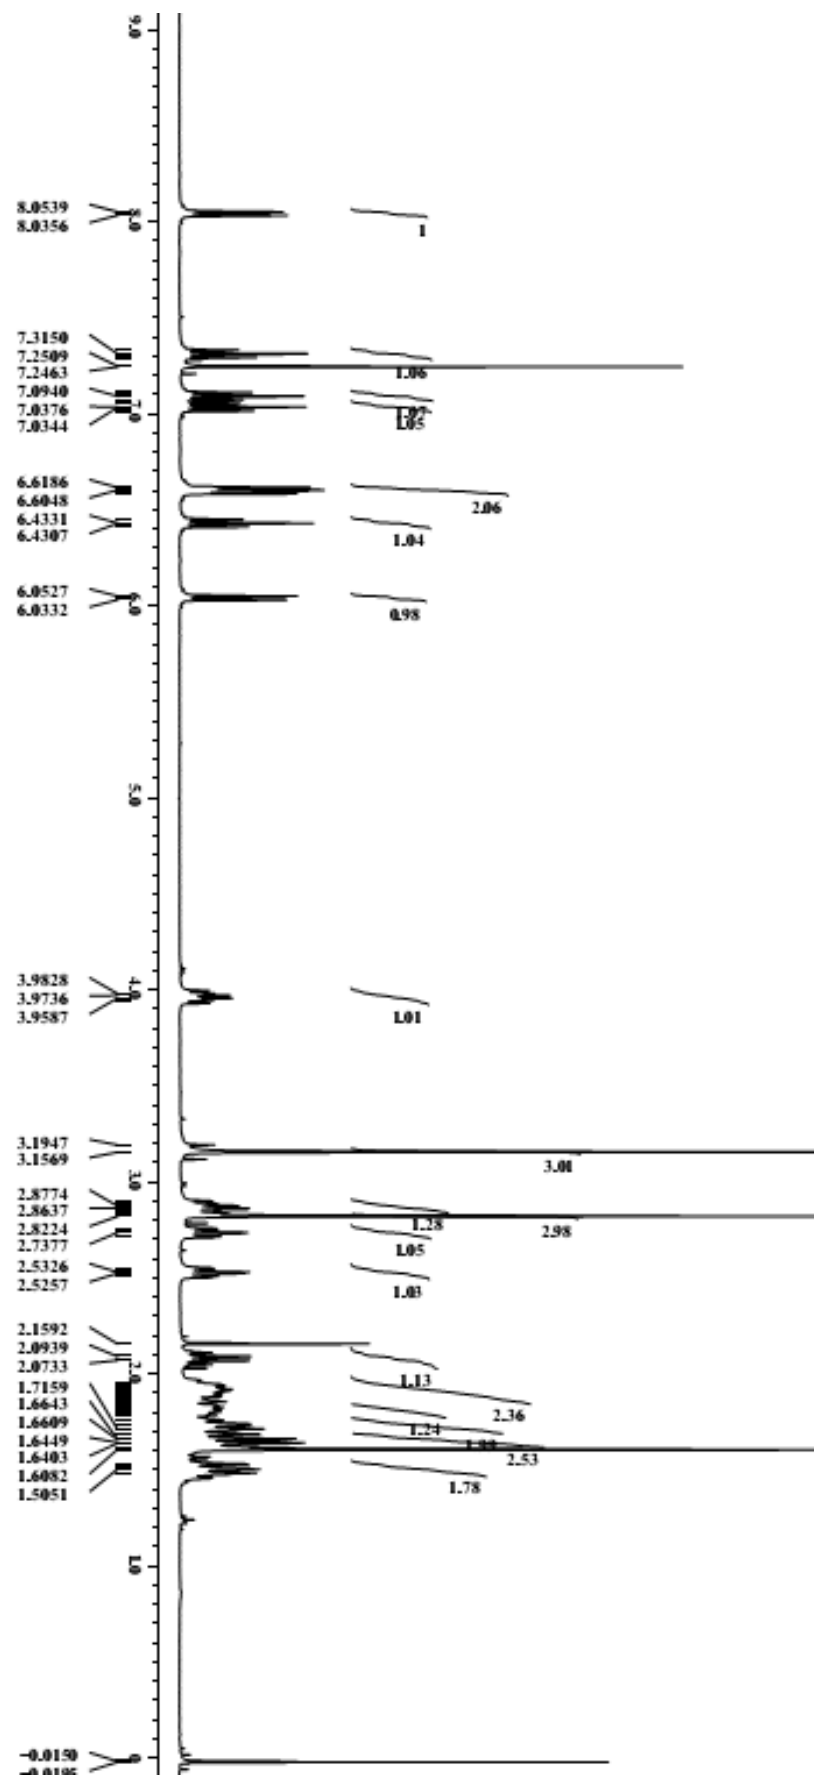



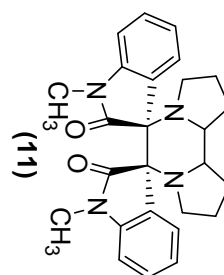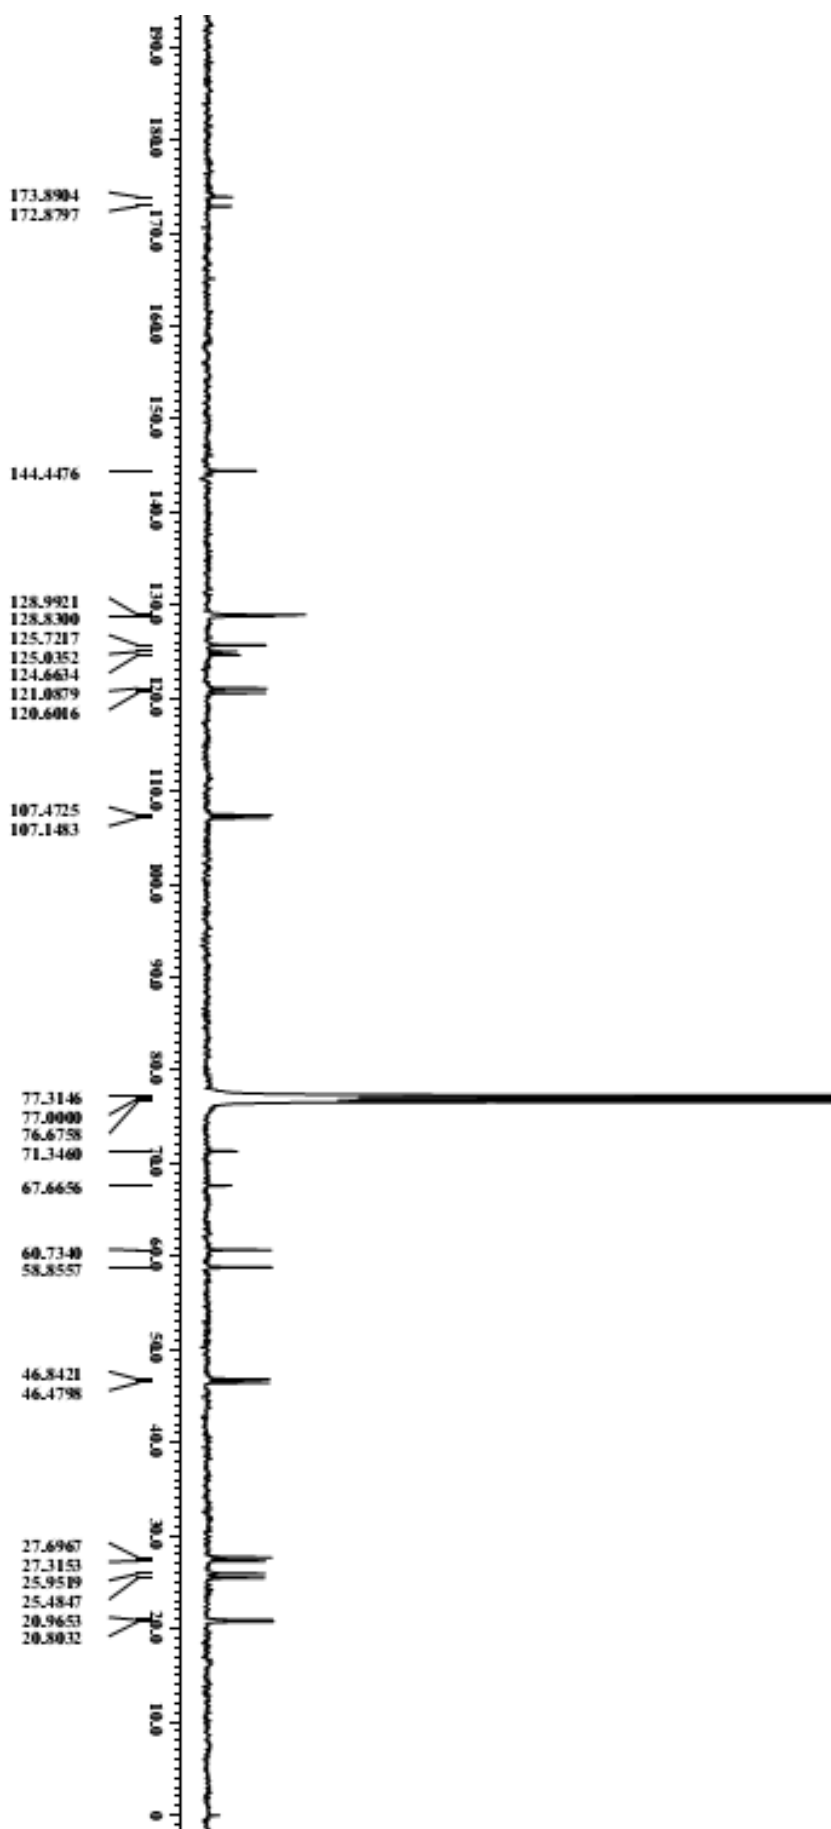

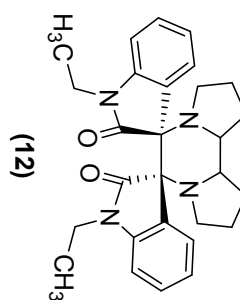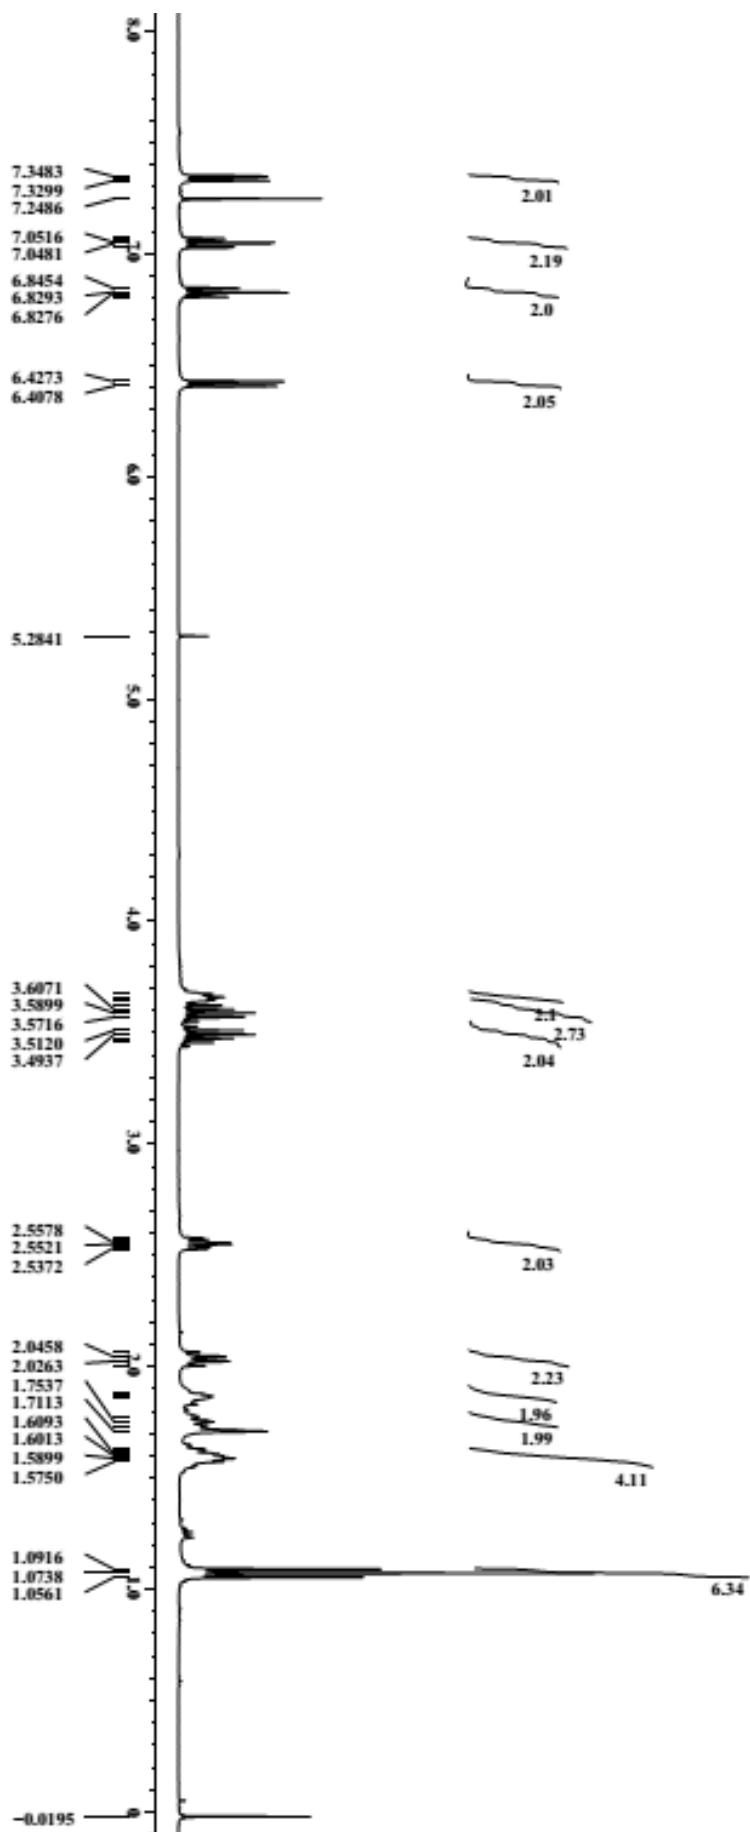

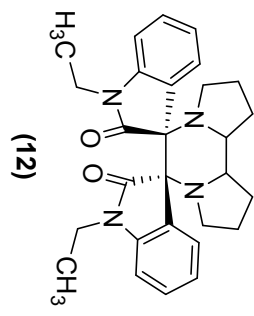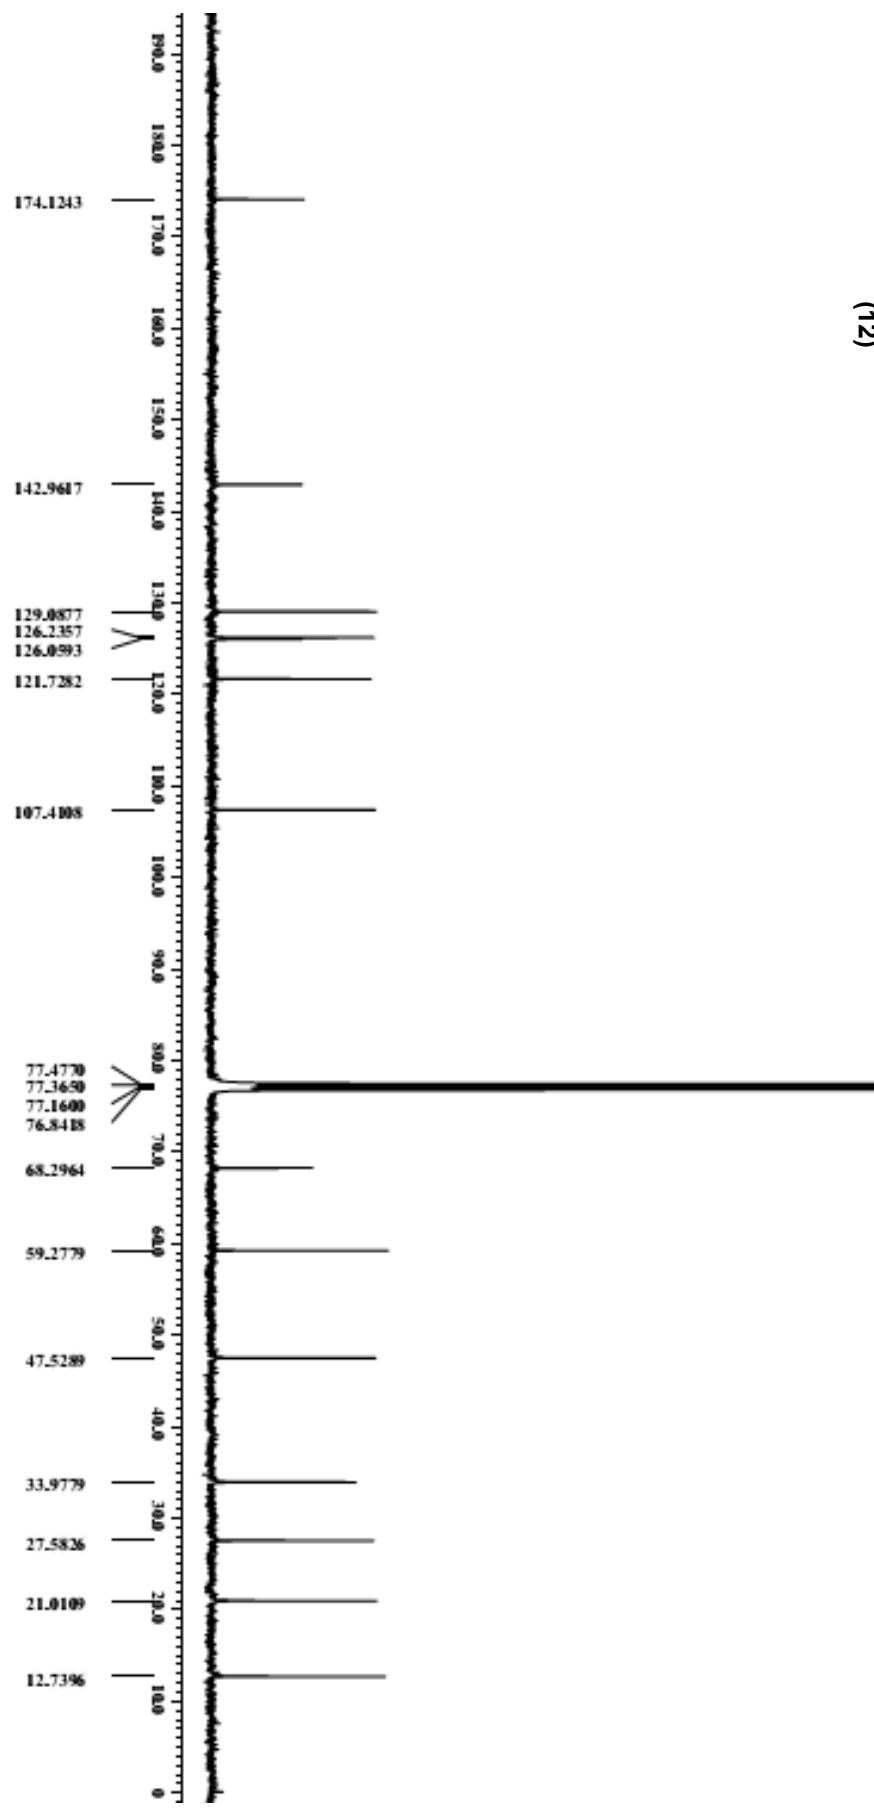

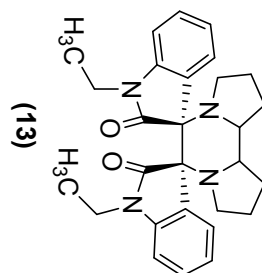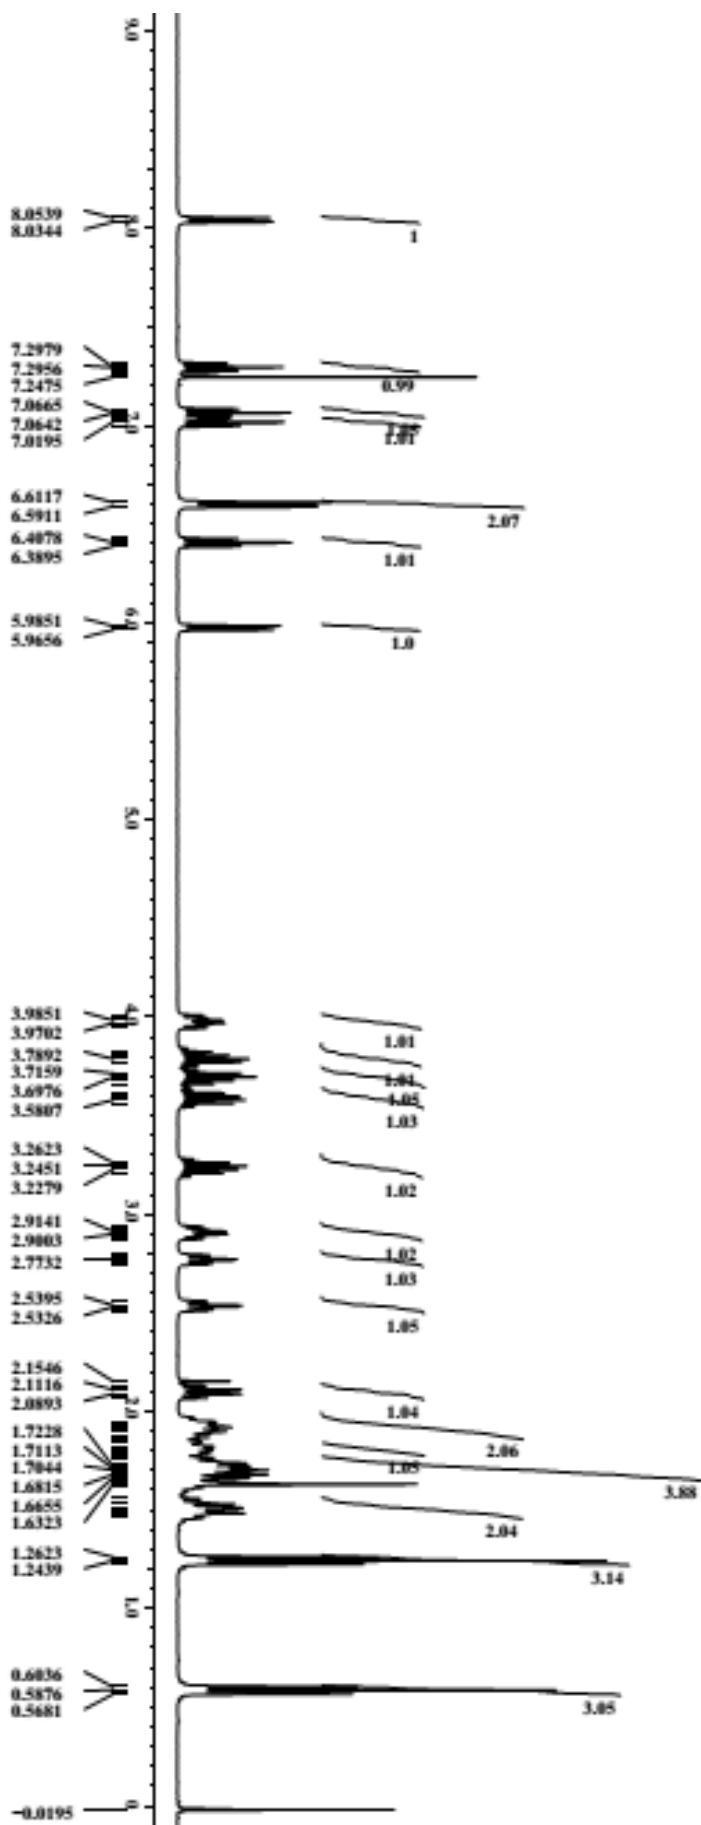

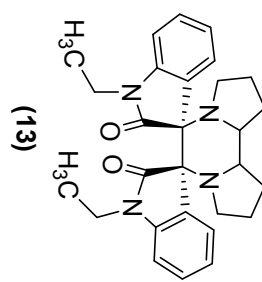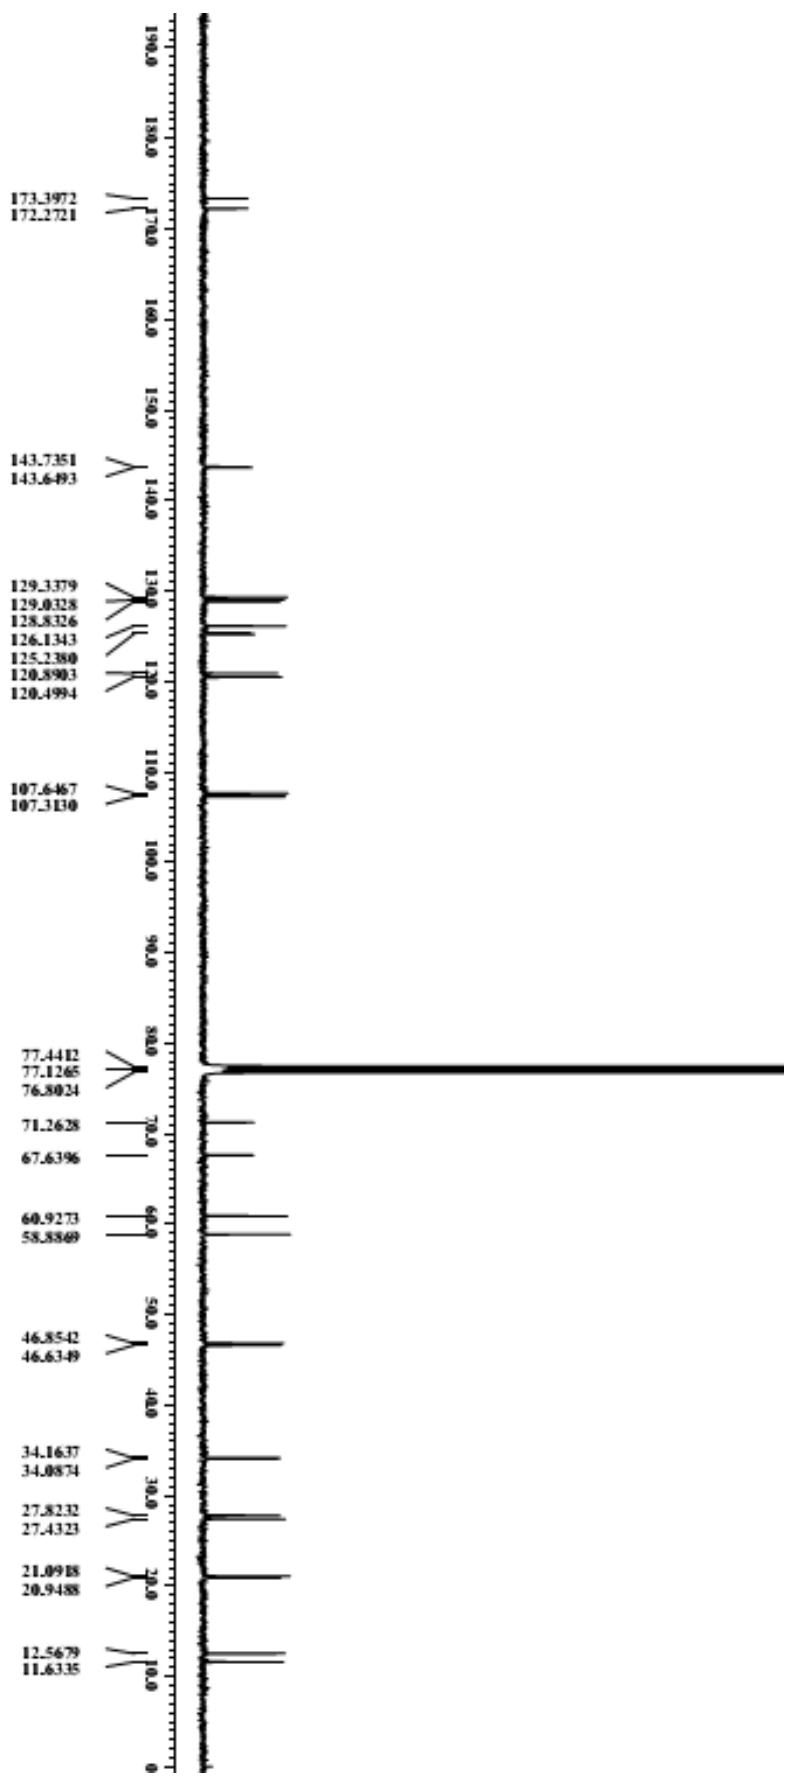

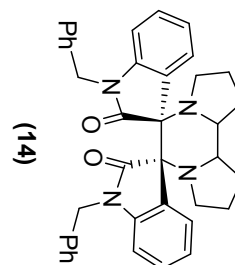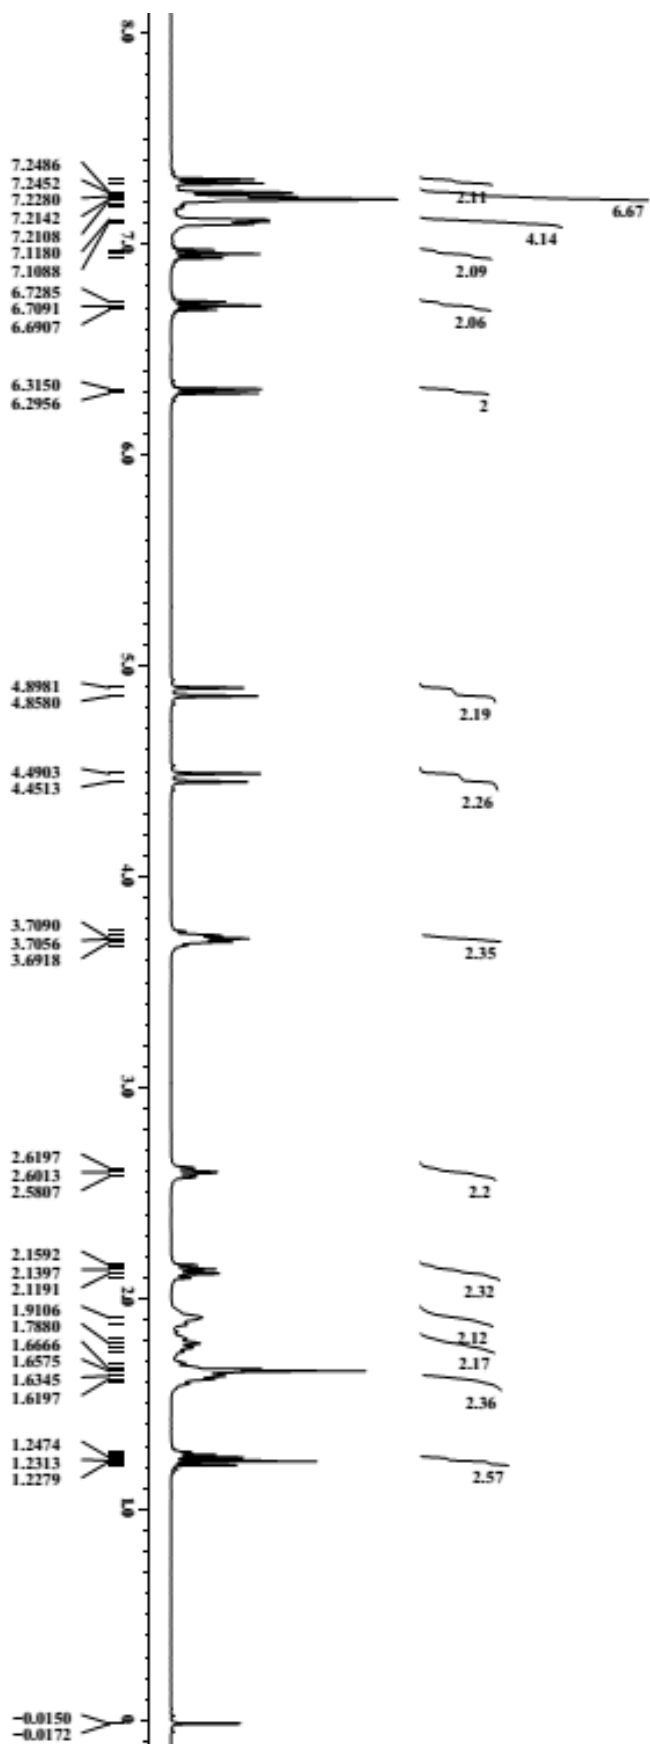

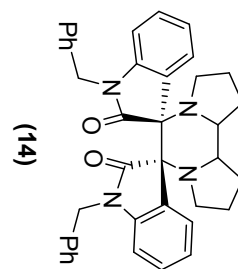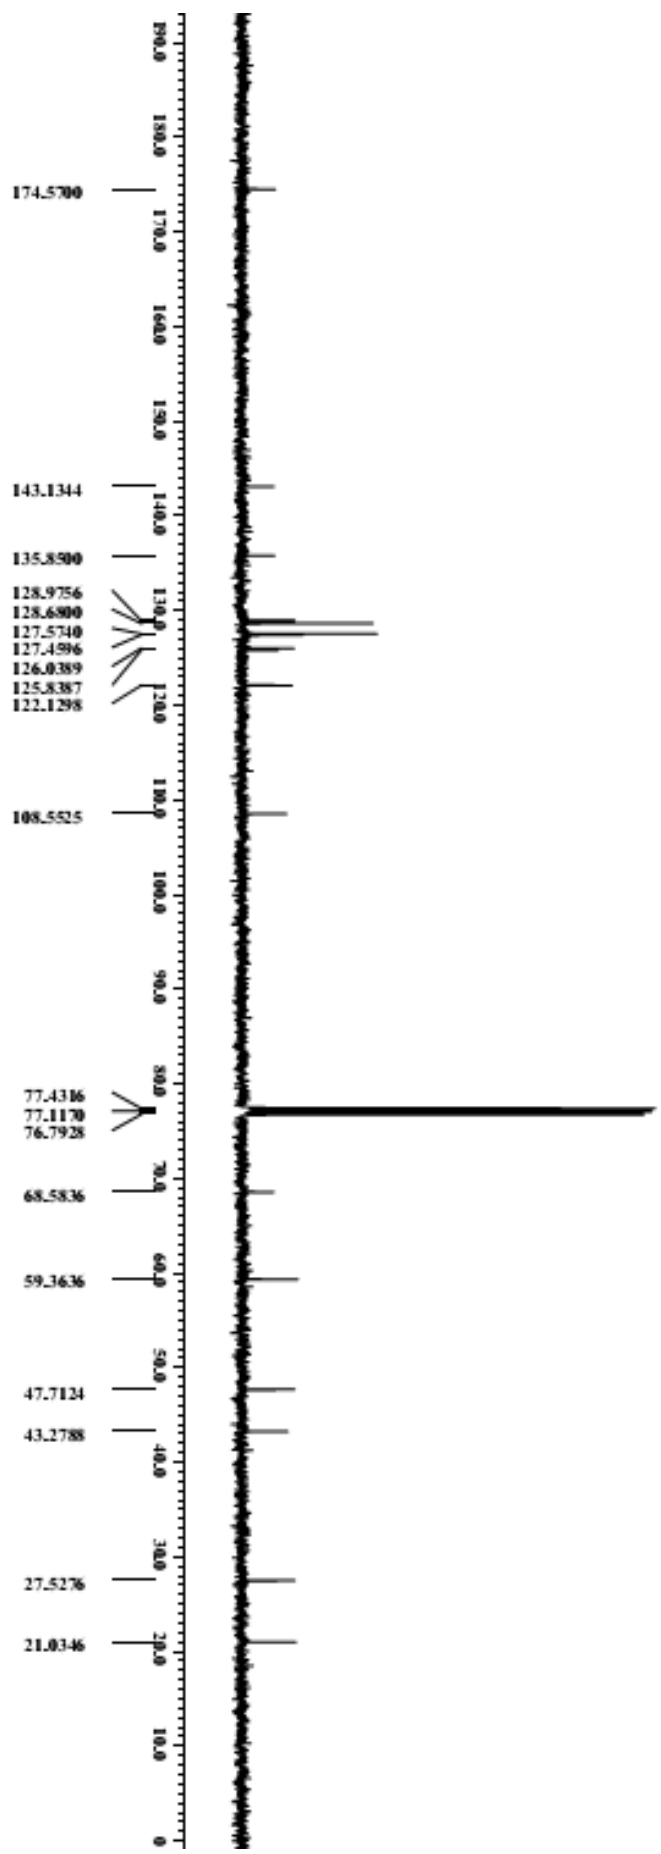

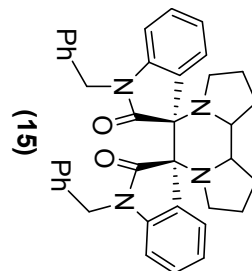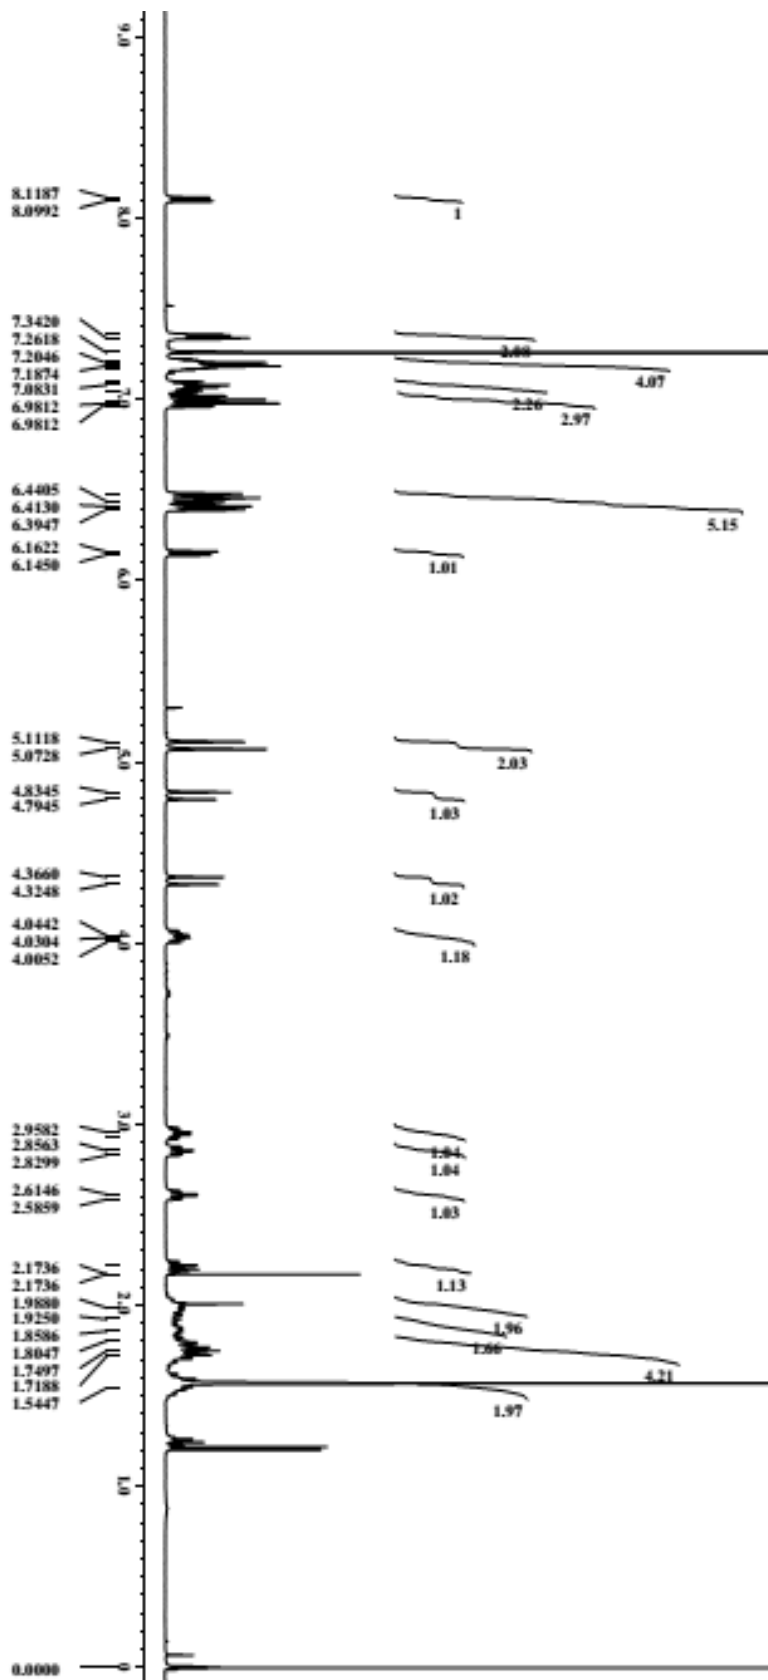



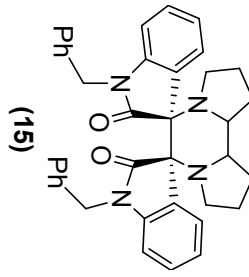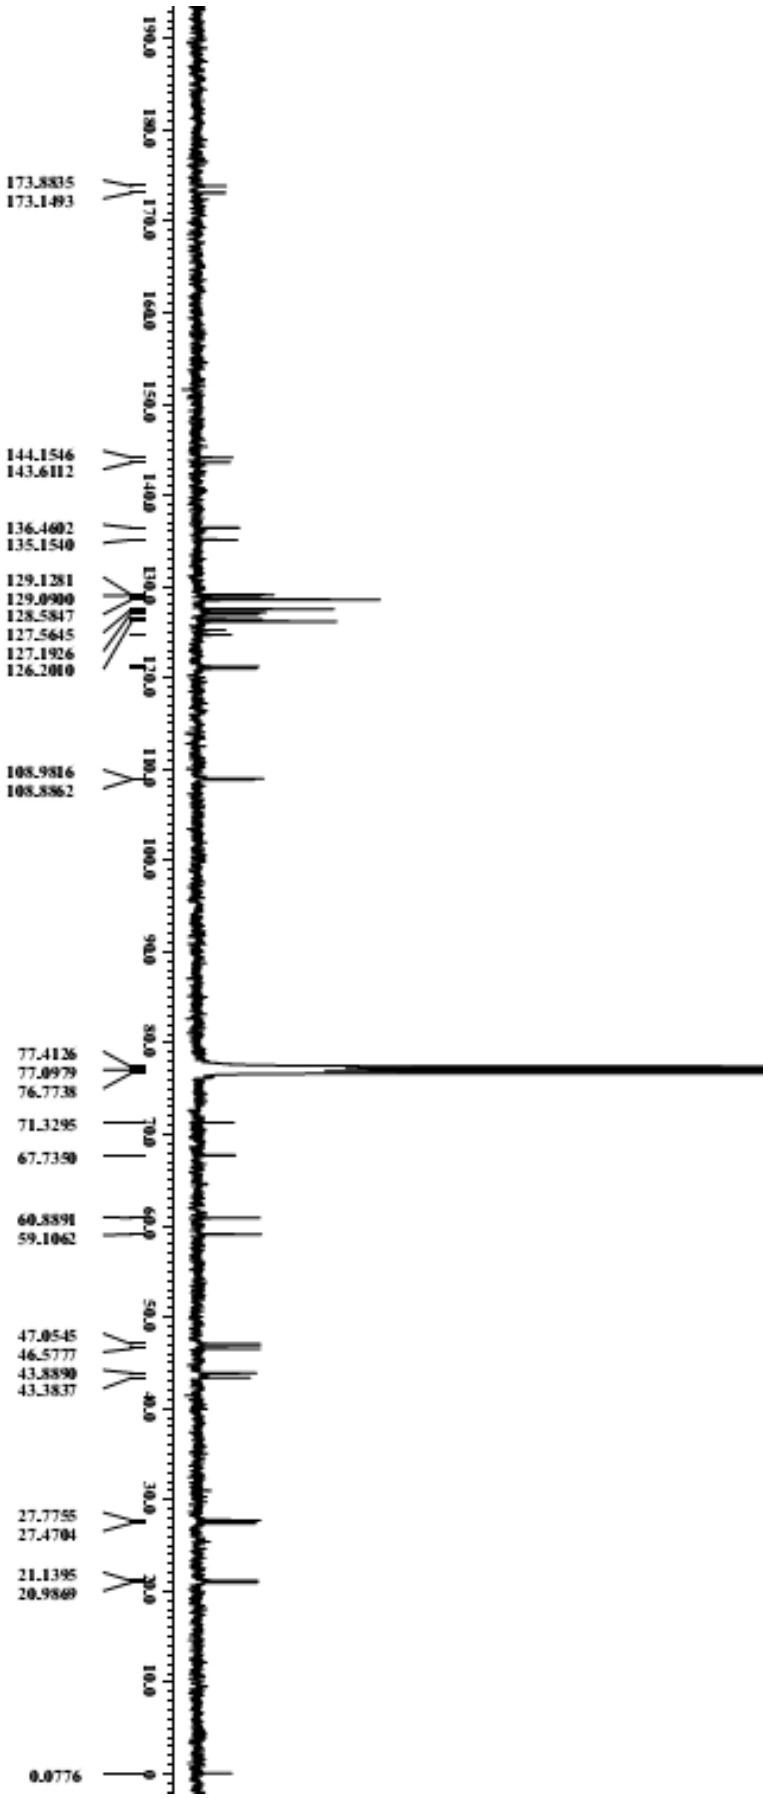

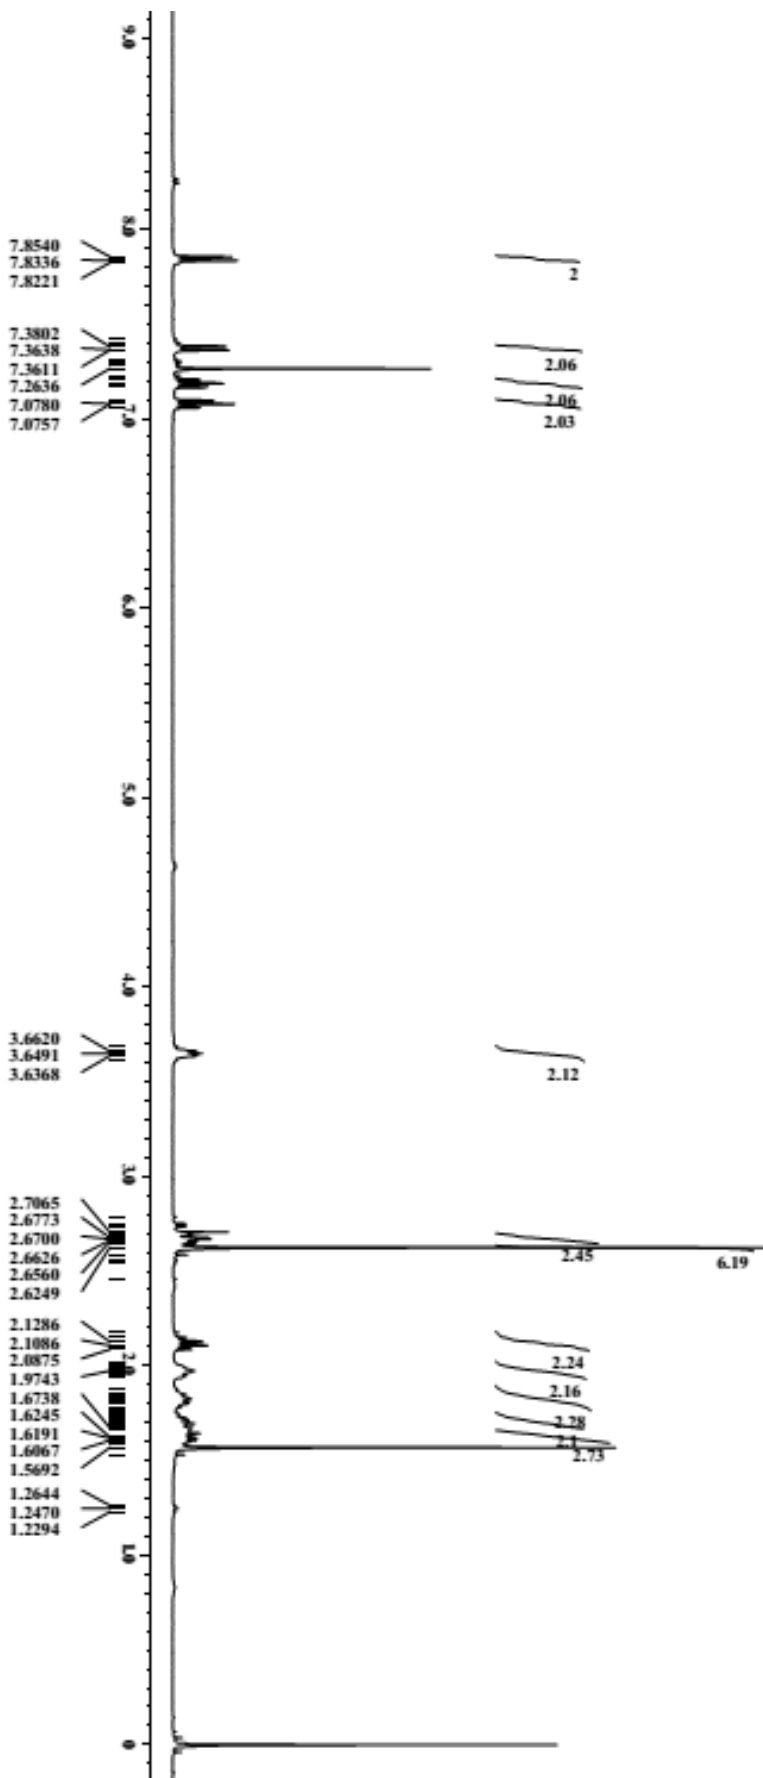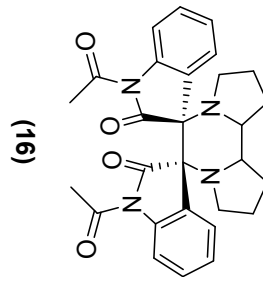

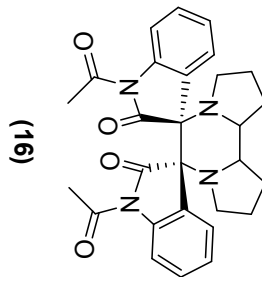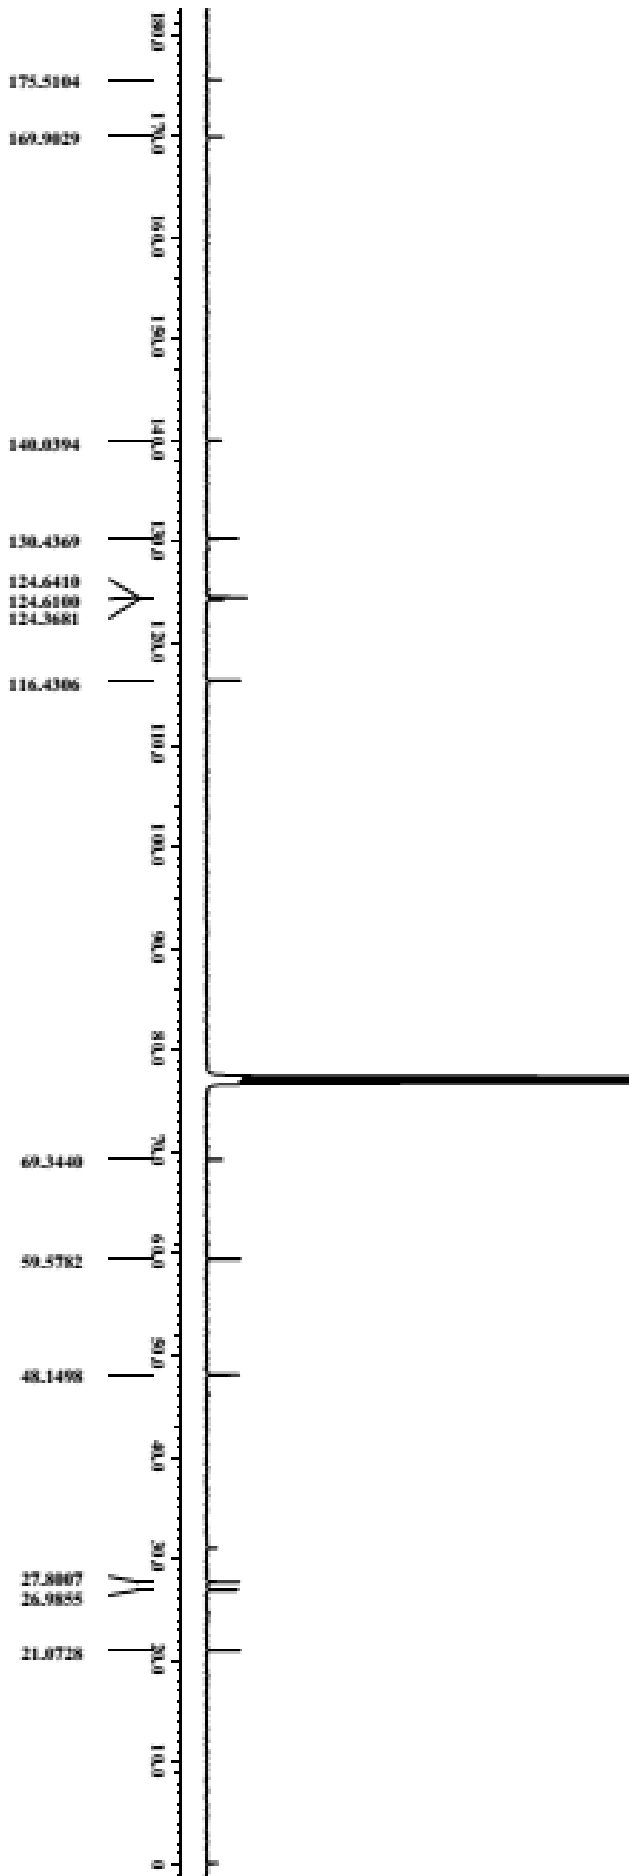

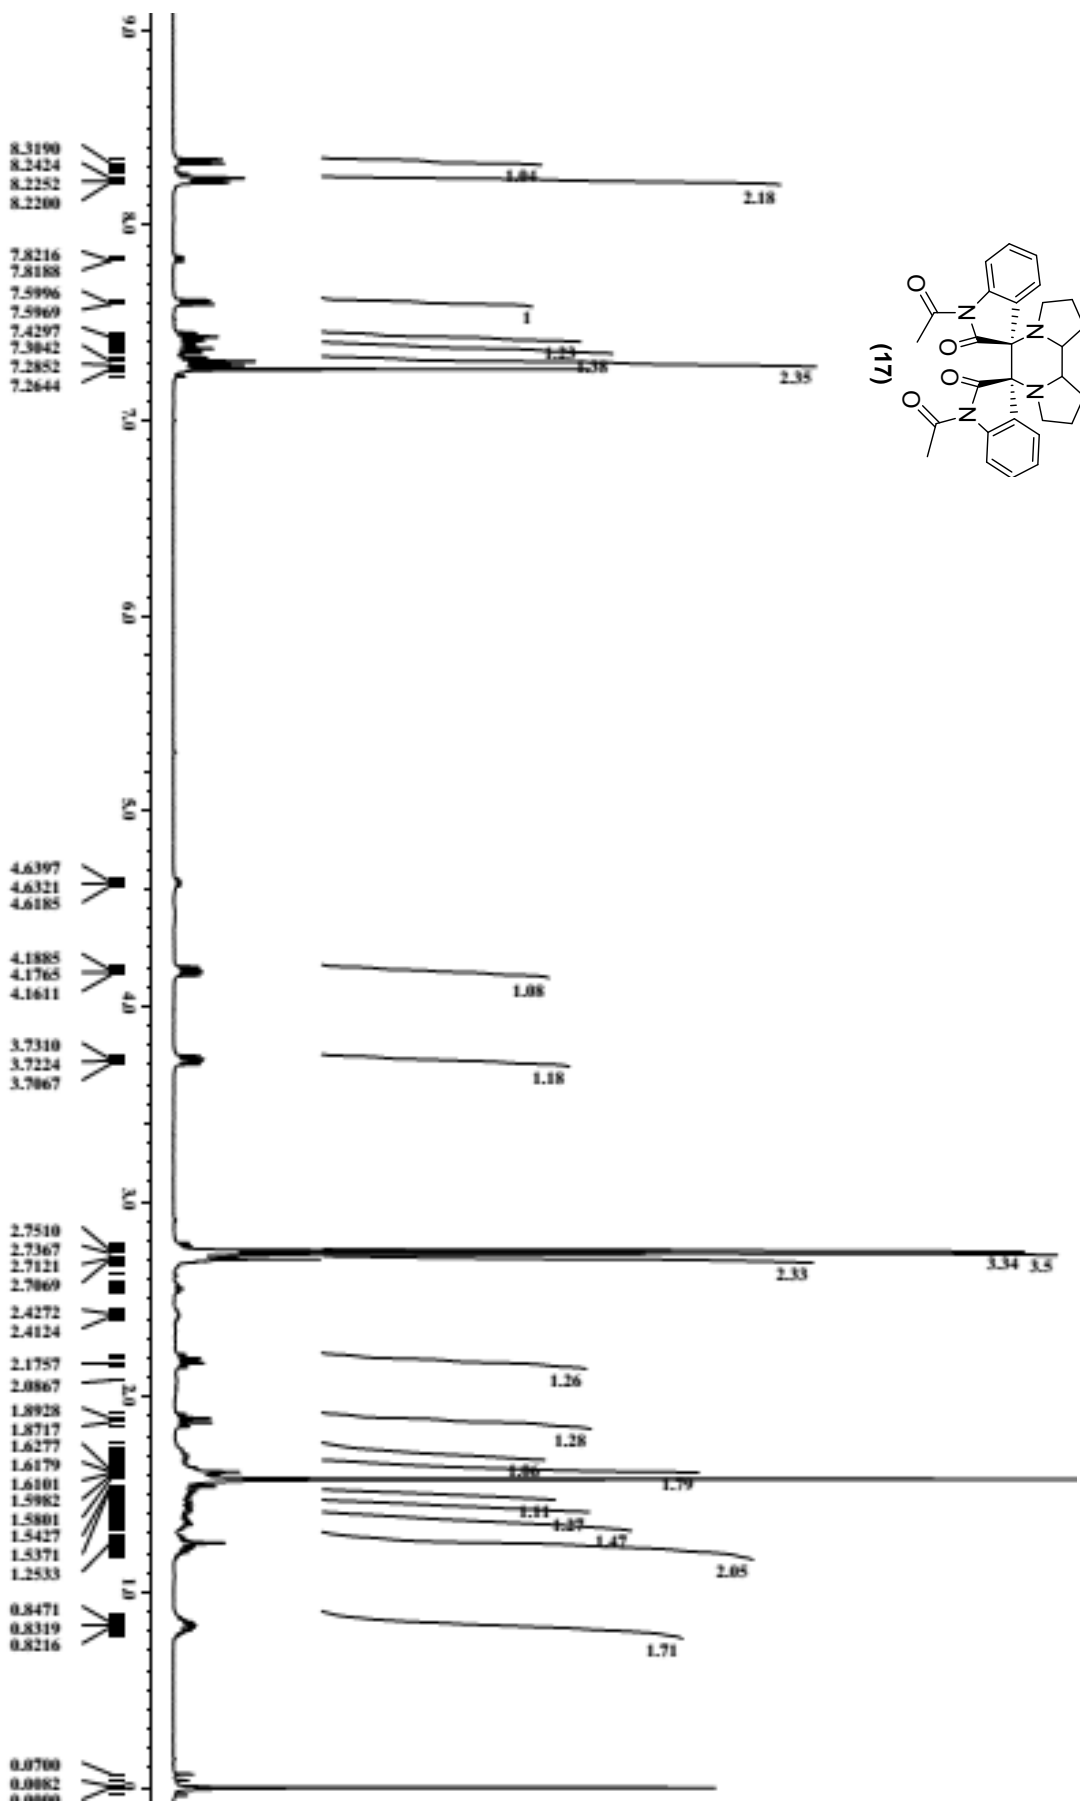

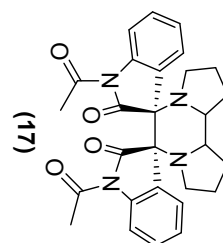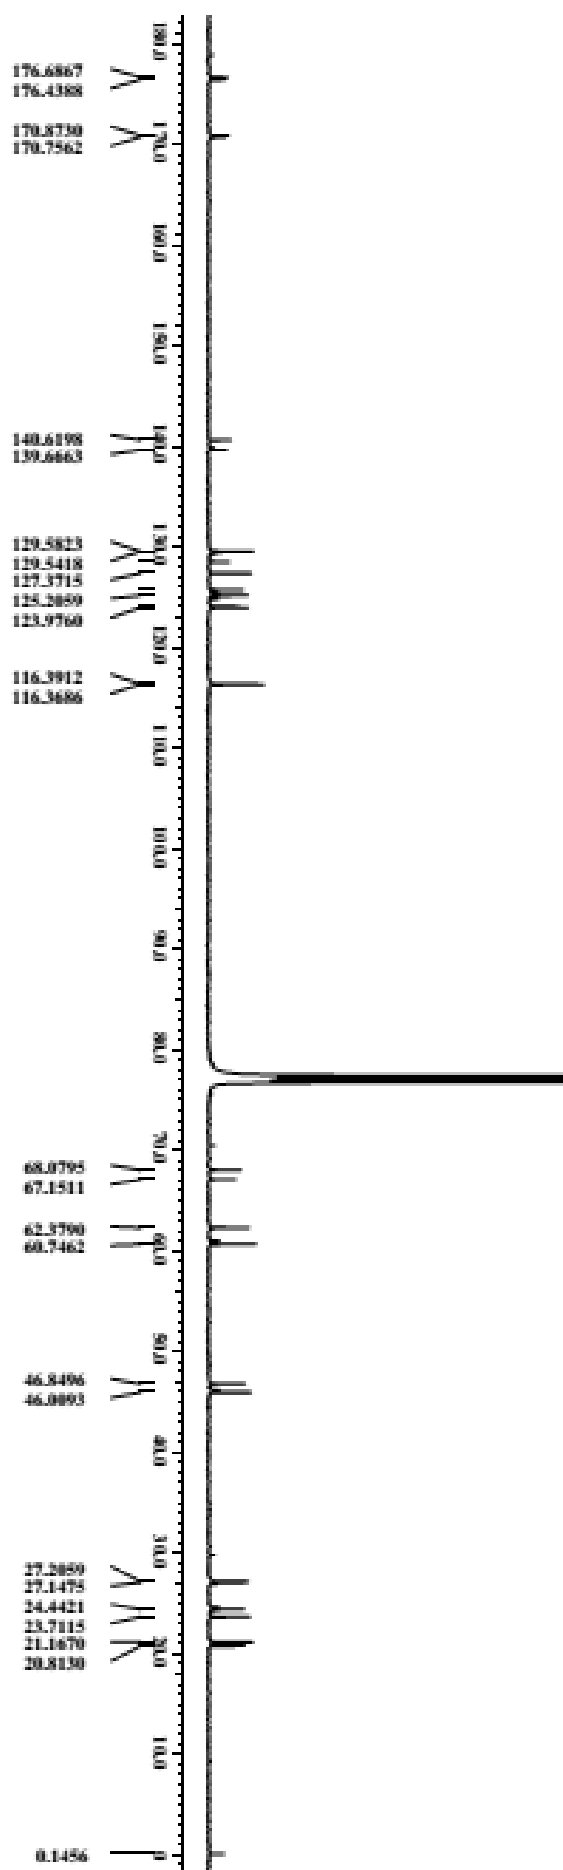

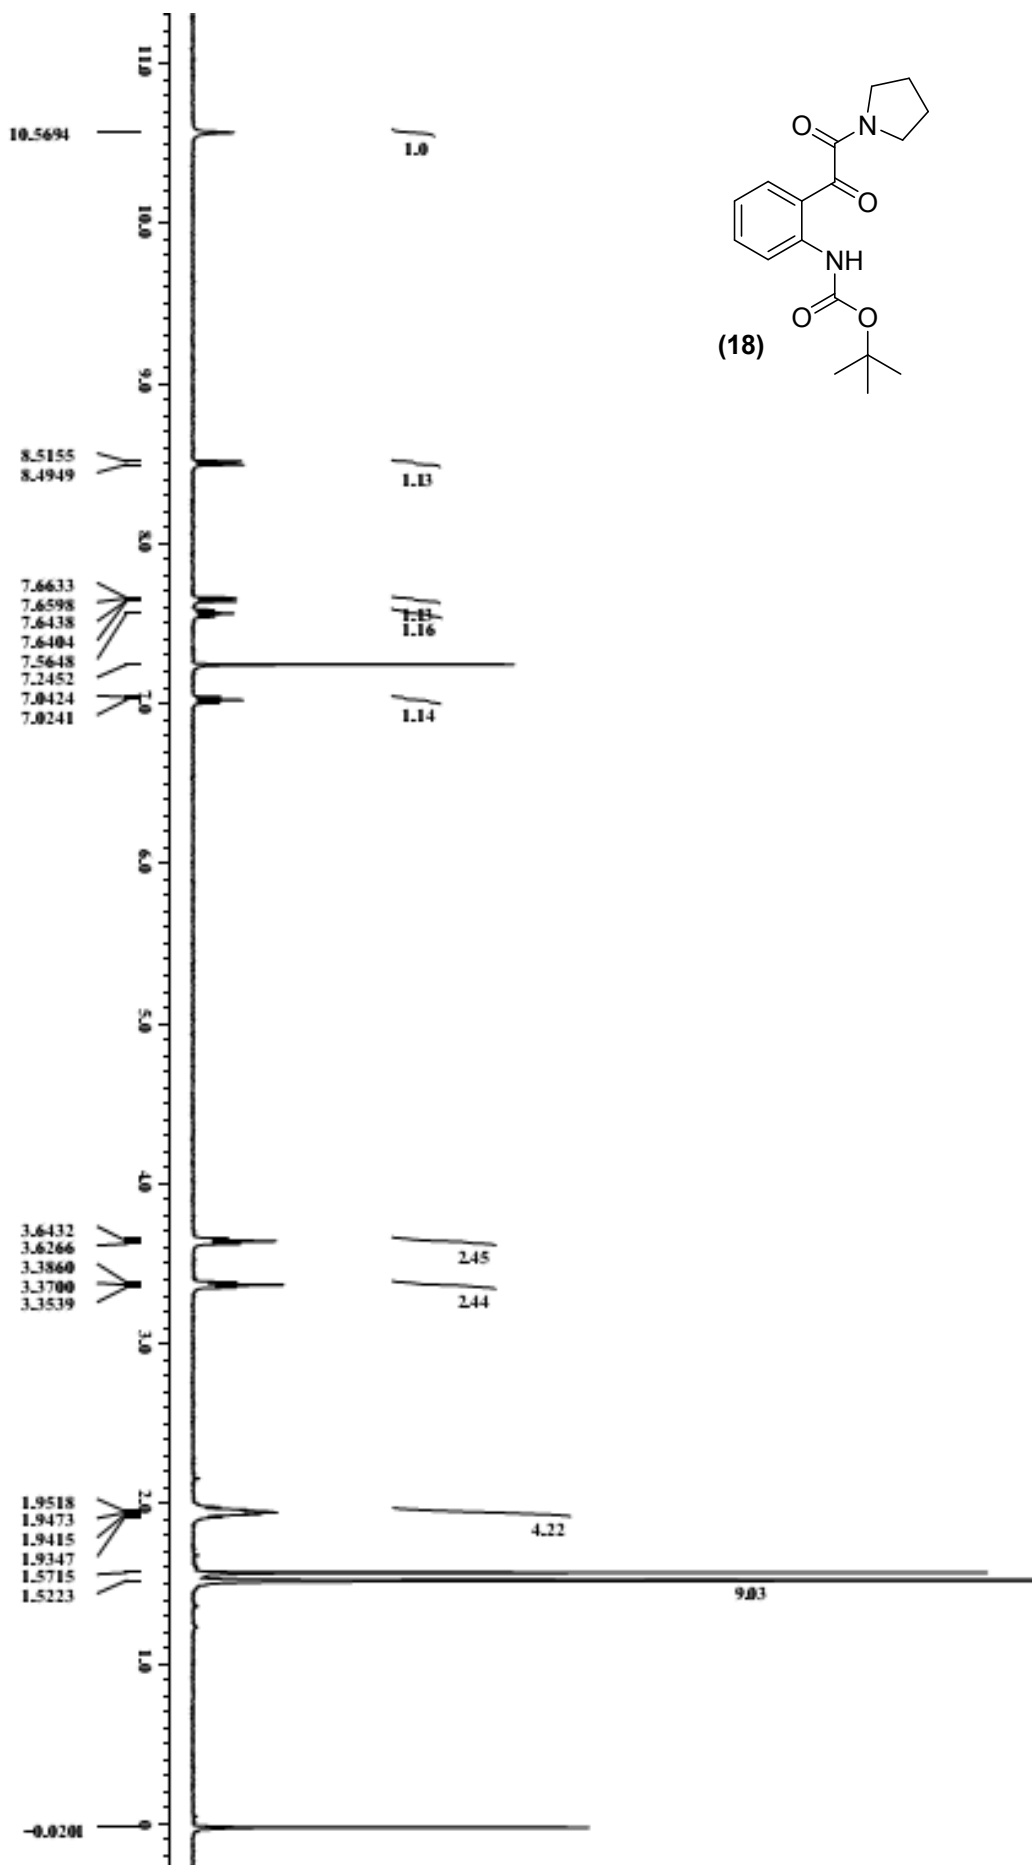

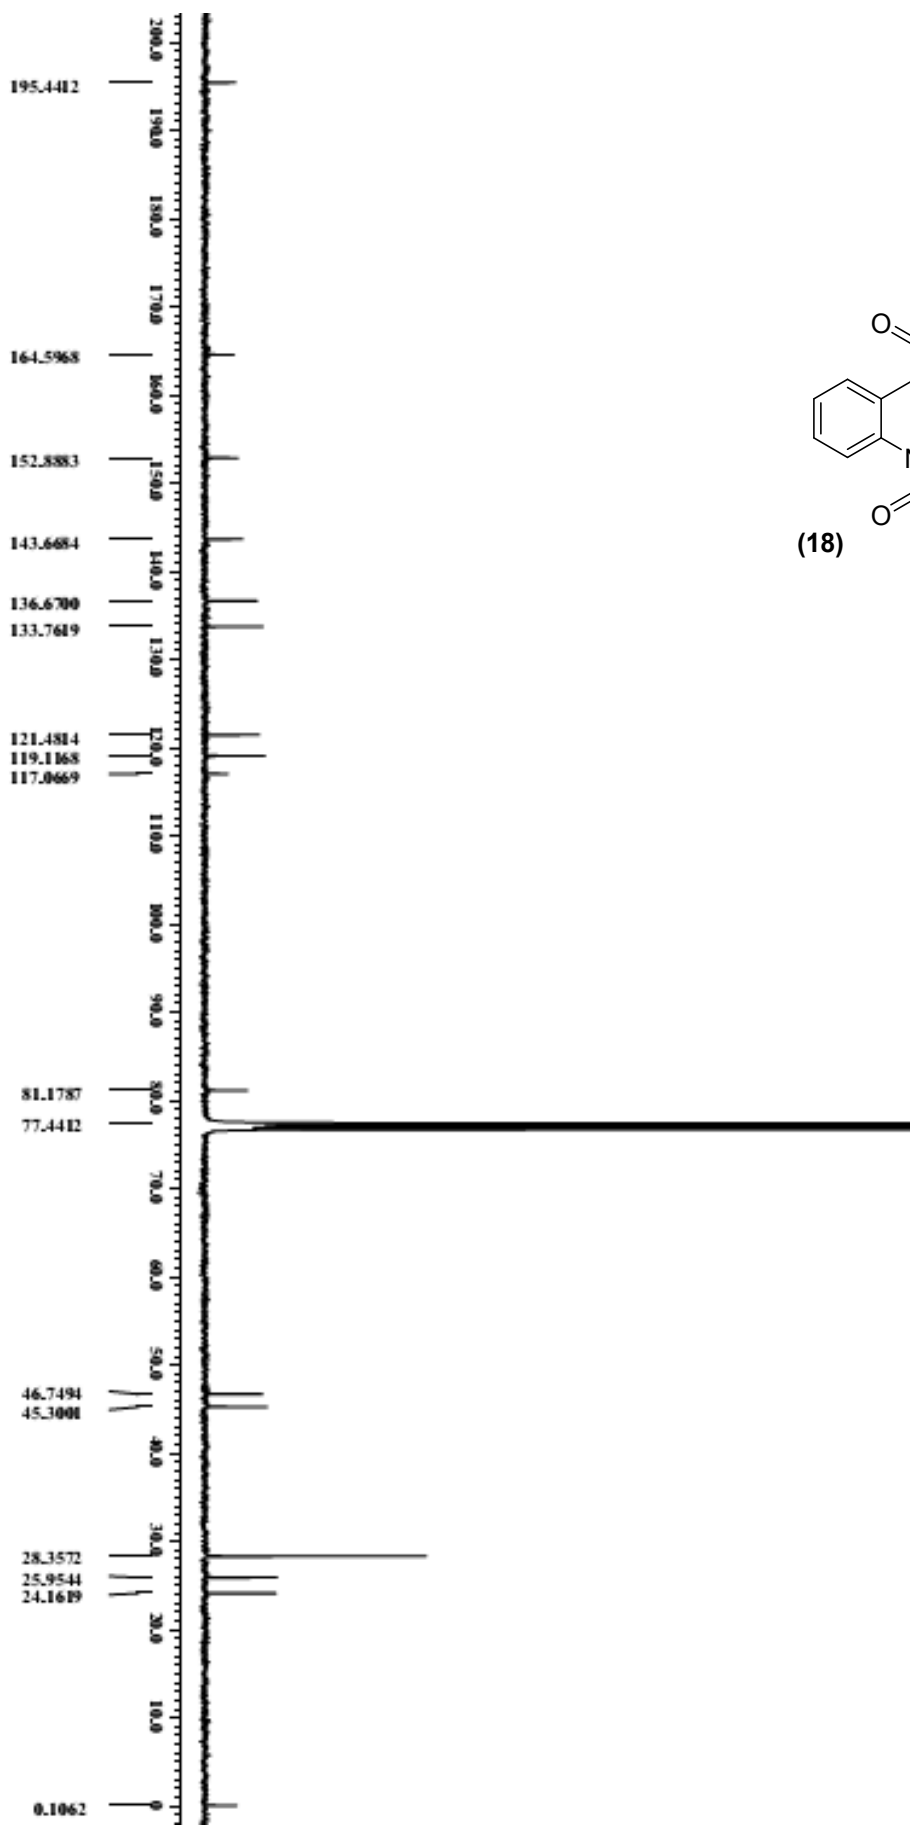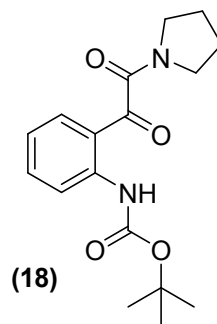

## X-ray Crystallography

X-ray single crystal structural data of compounds **8**, **9** and **18** were collected on a Bruker D8 Venture PHOTON 100 CMOS diffractometer equipped with a INCOATEC micro-focus source 1 $\mu$ s with graphite monochromated Mo K $\alpha$  radiation ( $\lambda = 0.71073$  Å) operating at 50 kV and 30 mA. The program SAINT<sup>i</sup> was used for integration of diffraction profiles and absorption correction was made with SADABS<sup>ii</sup> program. Both the structures were solved by SIR 92<sup>iii</sup> and refined by full matrix least square method using SHELXL-97<sup>iv</sup> and WinGX system, Ver 1.70.01.<sup>v</sup> All the non hydrogen atoms were located from the difference Fourier map and refined anisotropically. Due to disordered guest molecules in **8** and **9**, the PLATON/SQUEEZE route was used to calculate the diffraction contribution from the guest molecules and thereby to generate a set of guest-free diffraction intensities.<sup>vi</sup> All the hydrogen atoms except the ones on quaternary carbons and the nitrogen atoms were fixed by HFIX and placed in ideal positions and included in the refinement process using riding model with isotropic thermal parameters. All the crystallographic and structure refinement data of **8** and **9** are summarized in Table 1. Selected bond lengths and angles are given in Table 2. The crystallographic and structure refinement data of **18** is summarized in Table 3 and selected bond lengths and angles are given in Table 4.

**ORTEP Diagram of (3R,7'S) -1,1'',2,2''-tetrahydrodispiro[indole-3,8'-[6,9]diazatricyclo[7.3.0.0<sup>2,6</sup>]dodecane-7',3''-indole]-2,2''-dione (8).**

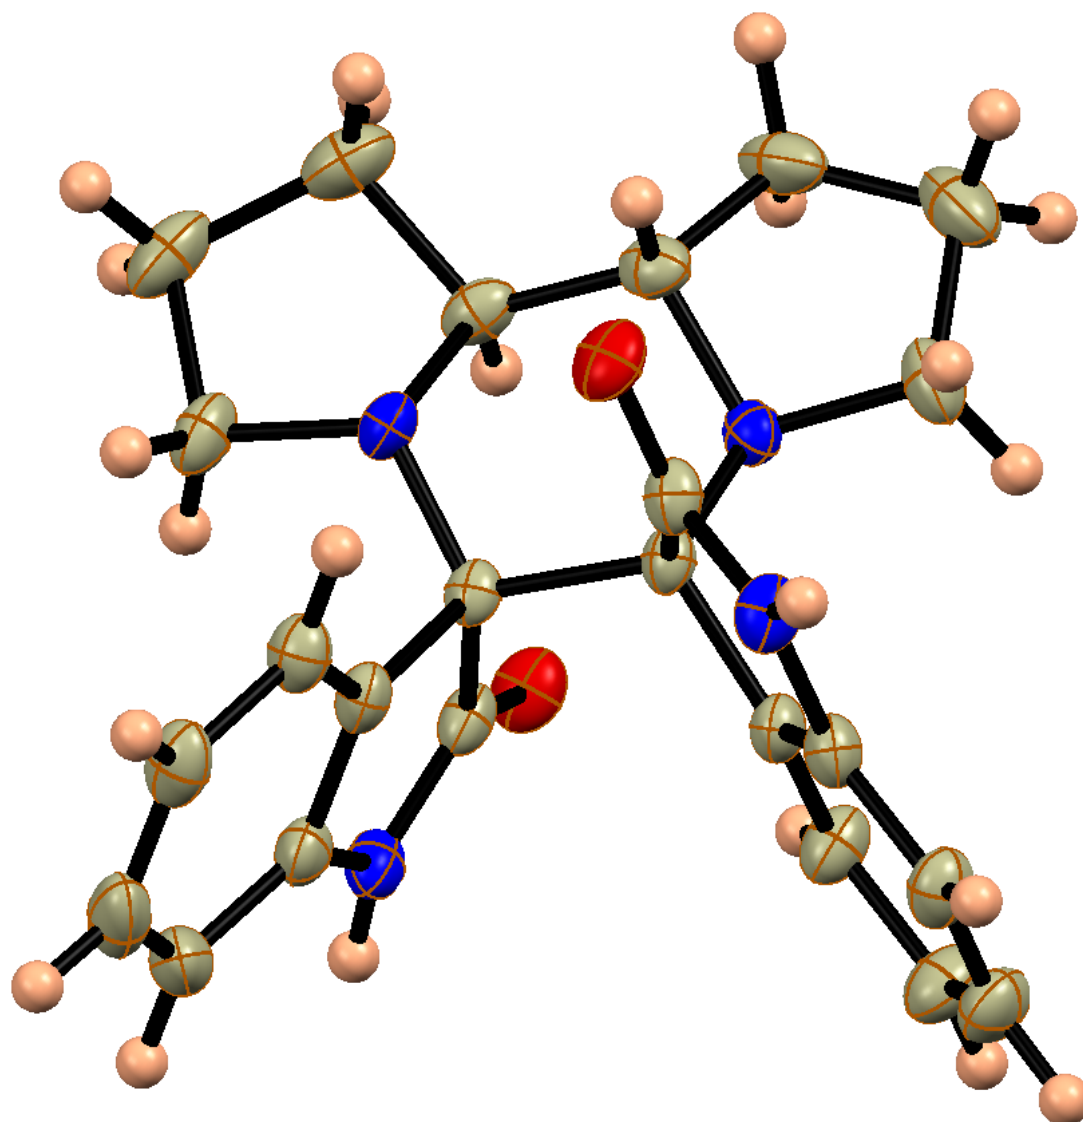



ORTEP Diagram of (3*R*,7'*R*) -1,1'',2,2''-tetrahydrodispiro[indole-3,8'-[6,9]diazatricyclo[7.3.0.0<sup>2,6</sup>]dodecane-7',3''-indole]-2,2''-dione (9).

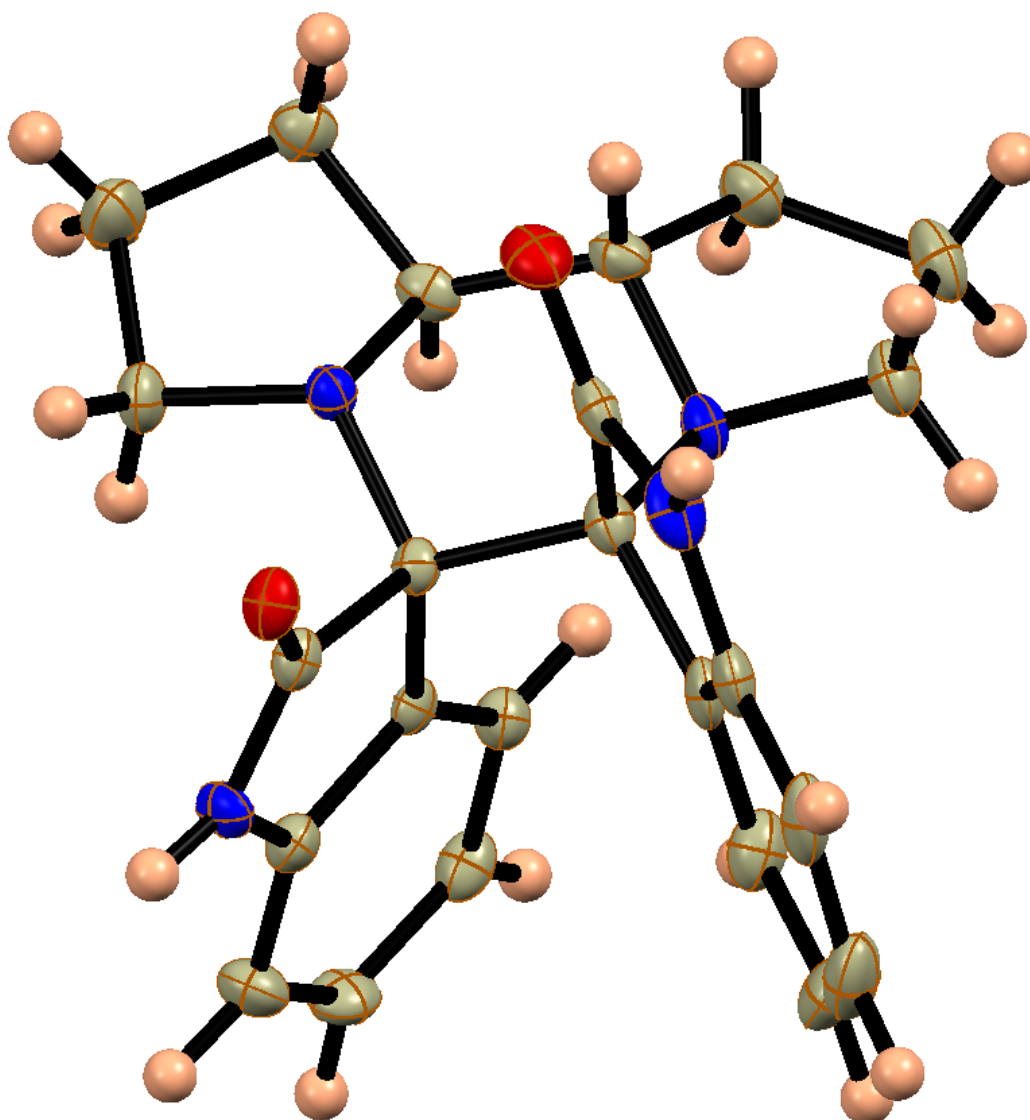

**Table 1 :** Crystal and structure refinement data for **8** and **9**

| Parameters                           | <b>8</b>                                                      | <b>9</b>                                                      |
|--------------------------------------|---------------------------------------------------------------|---------------------------------------------------------------|
| Empirical formula                    | C <sub>24</sub> H <sub>24</sub> N <sub>4</sub> O <sub>2</sub> | C <sub>24</sub> H <sub>24</sub> N <sub>4</sub> O <sub>2</sub> |
| Formula Weight                       | 400.47                                                        | 400.47                                                        |
| Crystal system                       | Trigonal                                                      | Orthorhombic                                                  |
| Space group                          | R-3(No.148)                                                   | Pbcn(No.60)                                                   |
| a (Å)                                | 32.703(2)                                                     | 27.5591(13)                                                   |
| b (Å)                                | 32.703(2)                                                     | 9.5215(5)                                                     |
| c (Å)                                | 20.7189(14)                                                   | 15.8189(7)                                                    |
| α (°)                                | 90                                                            | 90                                                            |
| β (°)                                | 90                                                            | 90                                                            |
| γ (°)                                | 120                                                           | 90                                                            |
| V(Å <sup>3</sup> )                   | 19190(2)                                                      | 4150.9(3)                                                     |
| Z                                    | 36                                                            | 8                                                             |
| D <sub>c</sub> (g cm <sup>-3</sup> ) | 1.247                                                         | 1.282                                                         |

|                                          |                    |                    |
|------------------------------------------|--------------------|--------------------|
| $\mu(\text{mm}^{-1})$                    | 0.081              | 0.084              |
| F(000)                                   | 7632               | 1696               |
| T(K)                                     | 100                | 100                |
| $\lambda(\text{Mo K}\alpha)(\text{\AA})$ | 0.71073            | 0.71073            |
| Crystal size(mm)                         | 0.28 x 0.32 x 0.40 | 0.29 x 0.32 x 0.34 |
| $\Theta_{\min}(\text{\textcircled{C}})$  | 2.4                | 2.3                |
| $\Theta_{\max}(\text{\textcircled{C}})$  | 28.4               | 25.0               |
| Total data                               | 139193             | 18774              |
| Unique data                              | 10651              | 3635               |
| $R_{\text{int}}$                         | 0.053              | 0.059              |
| Data[ $I > 2\sigma(I)$ ]                 | 8959               | 2790               |
| $R^a$                                    | 0.0542             | 0.0561             |
| $R_w^b$                                  | 0.2133             | 0.1671             |
| S                                        | 0.90               | 1.05               |

**Table 2** : Selected bond lengths ( $\text{\AA}$ ) and angles ( $\text{\textcircled{C}}$ ) in **8** and **9**

| Compound 8   |            |             |            | Compound 9 |            |             |            |
|--------------|------------|-------------|------------|------------|------------|-------------|------------|
| O1-C16       | 1.222(2)   | C1-C2       | 1.532(3)   | O1-C16     | 1.219(3)   | C13-C14     | 1.391(3)   |
| O2-C24       | 1.221(2)   | C2-C3       | 1.526(3)   | O2-C24     | 1.218(3)   | C14-C15     | 1.373(3)   |
| O3-C16A      | 1.2232(18) | C3-C4       | 1.518(3)   | N1-C1      | 1.469(3)   | C17-C18     | 1.521(3)   |
| O4-C24A      | 1.2293(18) | C4-C5       | 1.503(2)   | N1-C4      | 1.471(3)   | C17-C24     | 1.575(3)   |
| N1-C4        | 1.476(2)   | C5-C6       | 1.522(3)   | N1-C9      | 1.470(3)   | C18-C23     | 1.401(3)   |
| N1-C1        | 1.474(2)   | C6-C7       | 1.530(3)   | N2-C5      | 1.468(3)   | C18-C19     | 1.381(3)   |
| N1-C9        | 1.458(2)   | C7-C8       | 1.537(3)   | N2-C8      | 1.464(3)   | C19-C20     | 1.390(4)   |
| N2-C8        | 1.468(2)   | C9-C17      | 1.572(2)   | N2-C17     | 1.461(3)   | C20-C21     | 1.390(4)   |
| N2-C5        | 1.469(2)   | C9-C16      | 1.561(2)   | N3-C23     | 1.400(3)   | C21-C22     | 1.378(4)   |
| N2-C17       | 1.455(2)   | C9-C10      | 1.530(2)   | N3-C24     | 1.356(3)   | C22-C23     | 1.380(4)   |
| N3-C16       | 1.351(2)   | C10-C15     | 1.391(2)   | N4-C15     | 1.407(3)   | C1-H1A      | 0.9700     |
| N3-C15       | 1.406(3)   | C10-C11     | 1.383(3)   | N4-C16     | 1.343(3)   | C1-H1B      | 0.9700     |
| N4-C23       | 1.404(3)   | C11-C12     | 1.392(3)   | N3-H3      | 0.8600     | C2-H2A      | 0.9700     |
| N4-C24       | 1.351(2)   | C12-C13     | 1.380(2)   | N4-H4      | 0.79(3)    | C2-H2B      | 0.9700     |
| N3-H3        | 0.93(3)    | C13-C14     | 1.390(3)   | C1-C2      | 1.527(4)   | C3-H3A      | 0.9700     |
| N4-H4B       | 0.91(2)    | C14-C15     | 1.384(3)   | C2-C3      | 1.537(4)   | C3-H3B      | 0.9700     |
| N5-C1A       | 1.462(3)   | C17-C18     | 1.530(2)   | C3-C4      | 1.523(3)   | C4-H4A      | 0.9800     |
| N5-C4A       | 1.480(2)   | C17-C24     | 1.566(2)   | C4-C5      | 1.509(3)   | C5-H5       | 0.96(3)    |
| N5-C9A       | 1.445(2)   | C18-C23     | 1.390(2)   | C5-C6      | 1.525(3)   | C6-H6A      | 0.9700     |
| N6-C8A       | 1.466(3)   | C18-C19     | 1.385(3)   | C6-C7      | 1.547(4)   | C6-H6B      | 0.9700     |
| N6-C17A      | 1.4522(19) | C19-C20     | 1.390(3)   | C7-C8      | 1.526(4)   | C7-H7A      | 0.9700     |
| N6-C5A       | 1.476(2)   | C20-C21     | 1.392(3)   | C9-C16     | 1.548(3)   | C7-H7B      | 0.9700     |
| N7-C15A      | 1.4018(19) | C21-C22     | 1.385(3)   | C9-C10     | 1.525(3)   | C8-H8A      | 0.9700     |
| N7-C16A      | 1.349(2)   | C22-C23     | 1.385(2)   | C9-C17     | 1.566(3)   | C8-H8B      | 0.9700     |
| N8-C24A      | 1.347(2)   | C1-H1B      | 0.9700     | C10-C11    | 1.387(3)   | C11-H11     | 0.9300     |
| N8-C23A      | 1.4055(19) | C1-H1A      | 0.9700     | C10-C15    | 1.396(3)   | C12-H12     | 0.9300     |
| N7-H7        | 0.92(3)    | C2-H2A      | 0.9700     | C11-C12    | 1.389(3)   | C13-H13     | 0.9300     |
| N8-H8        | 0.89(2)    | C2-H2B      | 0.9700     | C12-C13    | 1.376(3)   | C14-H14     | 0.9300     |
| C1-N1-C4     | 105.86(13) | C3-C4-C5    | 118.04(15) | C1-N1-C4   | 105.29(17) | N1-C9-C16   | 107.71(16) |
| C1-N1-C9     | 116.29(13) | N1-C4-C5    | 107.82(14) | C1-N1-C9   | 117.16(16) | C10-C9-C16  | 101.45(16) |
| C4-N1-C9     | 115.51(14) | N2-C5-C4    | 107.22(13) | C4-N1-C9   | 113.53(17) | C9-C10-C11  | 133.28(19) |
| C5-N2-C8     | 106.87(12) | C4-C5-C6    | 117.09(16) | C5-N2-C8   | 104.19(18) | C11-C10-C15 | 118.59(19) |
| C5-N2-C17    | 115.64(14) | N2-C5-C6    | 101.34(16) | C5-N2-C17  | 115.20(17) | C9-C10-C15  | 108.12(18) |
| C8-N2-C17    | 116.44(13) | C5-C6-C7    | 103.74(16) | C8-N2-C17  | 117.73(18) | C10-C11-C12 | 119.0(2)   |
| C15-N3-C16   | 112.01(14) | C6-C7-C8    | 105.59(16) | C23-N3-C24 | 112.5(2)   | C11-C12-C13 | 121.0(2)   |
| C23-N4-C24   | 111.75(15) | N2-C8-C7    | 104.18(15) | C15-N4-C16 | 112.0(2)   | C12-C13-C14 | 121.2(2)   |
| C15-N3-H3    | 121(2)     | N1-C9-C10   | 110.72(14) | C23-N3-H3  | 124.00     | C13-C14-C15 | 117.1(2)   |
| C16-N3-H3    | 126.7(19)  | C16-C9-C17  | 109.75(14) | C24-N3-H3  | 124.00     | N4-C15-C14  | 127.3(2)   |
| C24-N4-H4B   | 124.4(14)  | N1-C9-C16   | 111.48(13) | C16-N4-H4  | 127(2)     | C10-C15-C14 | 123.2(2)   |
| C23-N4-H4B   | 123.6(14)  | C10-C9-C16  | 101.00(12) | C15-N4-H4  | 121(2)     | N4-C15-C10  | 109.58(18) |
| C4A-N5-C9A   | 114.87(14) | C10-C9-C17  | 113.36(12) | N1-C1-C2   | 103.81(18) | O1-C16-N4   | 126.3(2)   |
| C1A-N5-C4A   | 105.49(14) | N1-C9-C17   | 110.24(12) | C1-C2-C3   | 105.7(2)   | O1-C16-C9   | 125.38(19) |
| C1A-N5-C9A   | 116.10(13) | C9-C10-C11  | 131.77(14) | C2-C3-C4   | 103.00(18) | N4-C16-C9   | 108.31(18) |
| C8A-N6-C17A  | 115.87(14) | C9-C10-C15  | 108.78(15) | N1-C4-C3   | 100.95(17) | N2-C17-C18  | 114.12(17) |
| C5A-N6-C8A   | 105.44(15) | C11-C10-C15 | 119.31(16) | N1-C4-C5   | 109.25(18) | N2-C17-C24  | 113.10(17) |
| C5A-N6-C17A  | 114.97(14) | C10-C11-C12 | 118.81(16) | C3-C4-C5   | 118.02(17) | C9-C17-C18  | 111.19(16) |
| C15A-N7-C16A | 112.03(13) | C11-C12-C13 | 120.8(2)   | C4-C5-C6   | 116.2(2)   | N2-C17-C9   | 105.95(17) |
| C23A-N8-C24A | 112.22(12) | C12-C13-C14 | 121.41(19) | N2-C5-C4   | 109.84(17) | C9-C17-C24  | 110.97(17) |

|            |            |             |            |            |            |              |            |
|------------|------------|-------------|------------|------------|------------|--------------|------------|
| C16A-N7-H7 | 120.5(16)  | C13-C14-C15 | 116.86(16) | N2 -C5-C6  | 101.16(18) | C18-C17-C24  | 101.66(18) |
| C15A-N7-H7 | 127.5(16)  | C10-C15-C14 | 122.79(17) | C5 -C6-C7  | 103.6(2)   | C19-C18-C23  | 118.9(2)   |
| C23A-N8-H8 | 120.6(16)  | N3-C15-C14  | 127.31(15) | C6 -C7-C8  | 105.13(19) | C17-C18-C19  | 132.7(2)   |
| C24A-N8-H8 | 127.0(15)  | N3-C15-C10  | 109.87(14) | N2-C8-C7   | 102.63(18) | C17-C18 -C23 | 108.38(19) |
| N1-C1-C2   | 104.07(16) | O1-C16-C9   | 126.07(13) | C10-C9-C17 | 114.40(17) | C18-C19-C20  | 119.4(2)   |
| C1-C2-C3   | 106.04(15) | O1-C16-N3   | 125.51(15) | C16-C9-C17 | 111.52(17) | C19-C20-C21  | 120.3(3)   |
| C2-C3-C4   | 102.55(17) | N3-C16-C9   | 108.34(15) | N1-C9-C17  | 107.15(16) | C20-C21-C22  | 121.3(3)   |
| N1-C4-C3   | 101.24(17) | C9-C17-C18  | 114.57(12) | N1-C9-C10  | 114.41(17) | C21-C22-C23  | 117.6(2)   |

ORTEP Diagram of tert-butyl 2-(2-oxo-2-(pyrrolidin-1-yl)acetyl)phenylcarbamate (18).

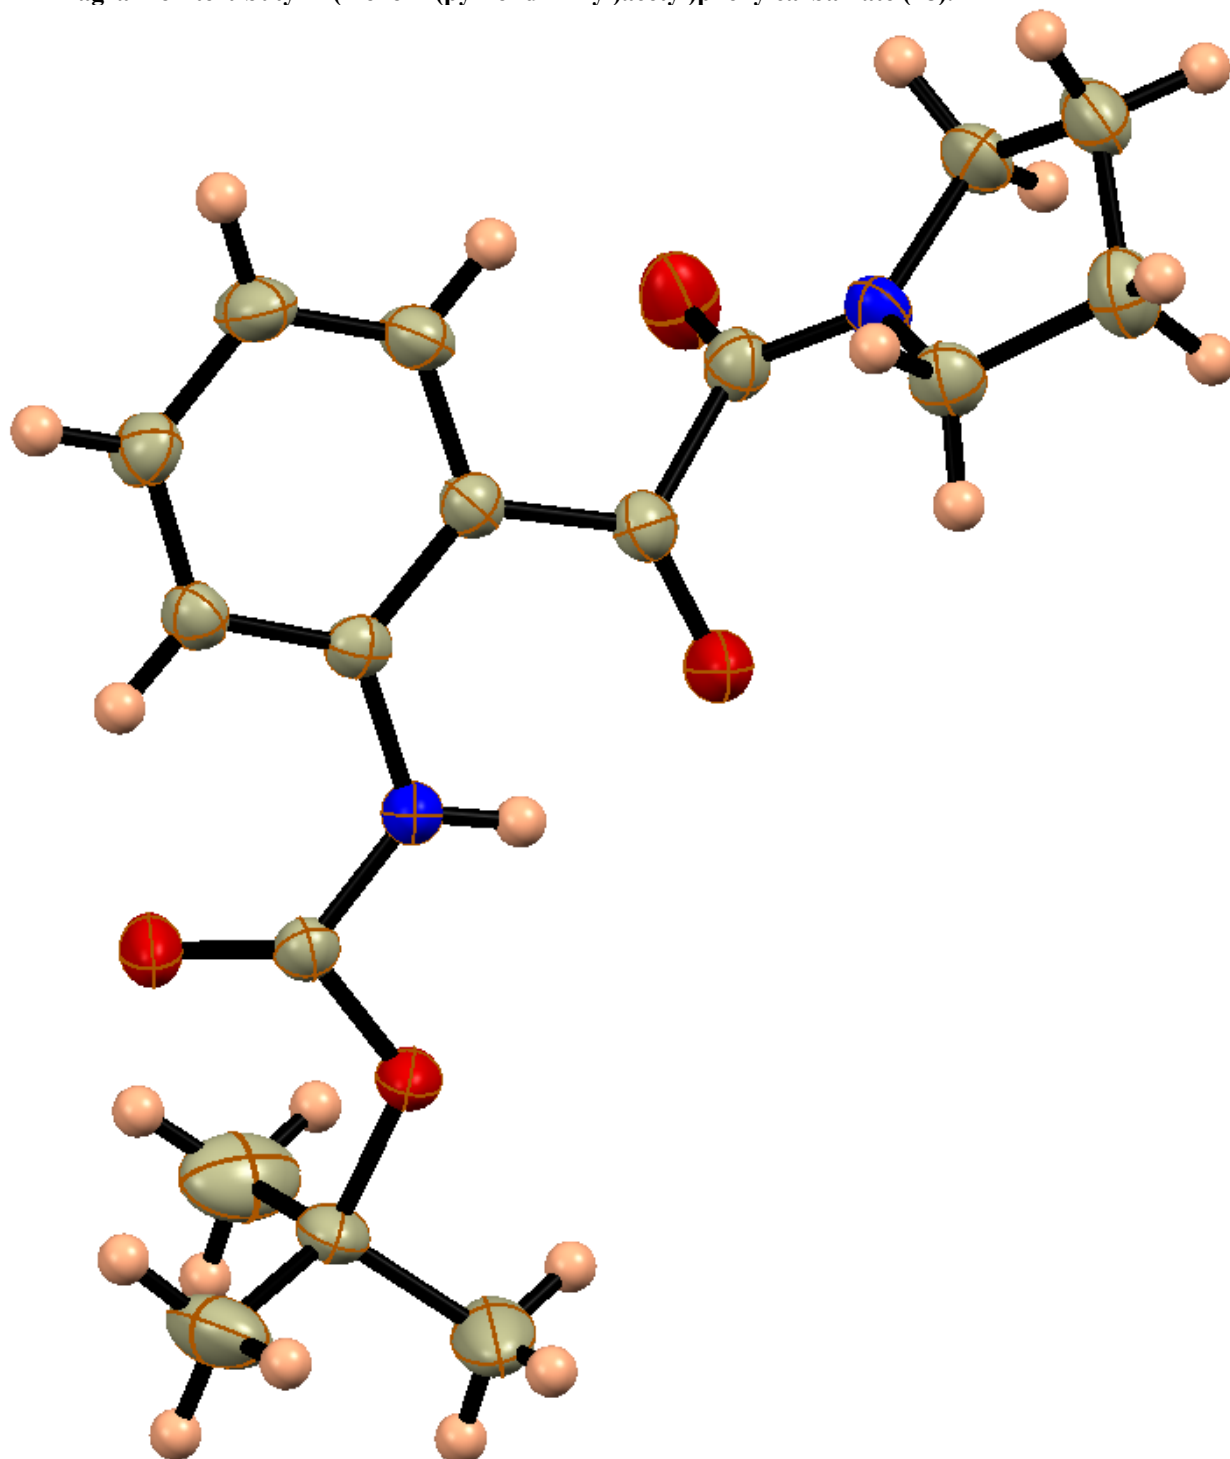

**Table 3** : Crystal and structure refinement data for **18**.

| Parameters                           | 18                                                            |
|--------------------------------------|---------------------------------------------------------------|
| Empirical formula                    | C <sub>17</sub> H <sub>22</sub> N <sub>2</sub> O <sub>4</sub> |
| Formula Weight                       | 318.37                                                        |
| Crystal system                       | Monoclinic                                                    |
| Space group                          | C2/c                                                          |
| a (Å)                                | 32.0681(13)                                                   |
| b (Å)                                | 11.0308(4)                                                    |
| c (Å)                                | 9.7494(3)                                                     |
| α (°)                                | 90                                                            |
| β (°)                                | 104.548(2)                                                    |
| γ (°)                                | 90                                                            |
| V(A <sup>3</sup> )                   | 3338.2(2)                                                     |
| Z                                    | 8                                                             |
| D <sub>c</sub> (g cm <sup>-3</sup> ) | 1.267                                                         |
| μ(mm <sup>-1</sup> )                 | 0.091                                                         |
| F(000)                               | 1360                                                          |
| T(K)                                 | 293                                                           |
| λ(Mo K <sub>α</sub> )(Å)             | 0.71073                                                       |
| Crystal size(mm)                     | 0.00 x 0.00 x 0.00                                            |
| Θ <sub>min</sub> (°)                 | 2.6                                                           |
| Θ <sub>max</sub> (°)                 | 24.0                                                          |
| Total data                           | 28888                                                         |
| Unique data                          | 2625                                                          |
| R <sub>int</sub>                     | 0.029                                                         |
| Data[I>2σ(I)]                        | 2334                                                          |
| R <sup>a</sup>                       | 0.0319                                                        |
| R <sub>w</sub> <sup>b</sup>          | 0.0853                                                        |
| S                                    | 1.08                                                          |

**Table 4** : Selected bond lengths (Å) and angles (°) in **18**.

| Compound 18 |            |             |            |
|-------------|------------|-------------|------------|
| O1-C13      | 1.1982(17) | C14-C17     |            |
| 1.502(2)    |            |             |            |
| O2-C13      | 1.3390(16) | C14-C15     | 1.510(3)   |
| O2-C14      | 1.4803(17) | C3-H3       | 0.9300     |
| O3-C7       | 1.2275(18) | C4-H4       | 0.9300     |
| O4-C8       | 1.2277(18) | C5-H5       | 0.9300     |
| N1-C13      | 1.3740(18) | C9-H9A      | 0.9700     |
| N2 -C8      | 1.3258(18) | C9-H9B      | 0.9700     |
| N2 -C9      | 1.4721(18) | C10-H10A    | 0.9700     |
| N2 -C12     | 1.4684(19) | C10-H10B    | 0.9700     |
| N1 -H1A     | 0.86(2)    | C11-H11A    | 0.9700     |
| C1 -C6      | 1.401(2)   | C11-H11B    | 0.9700     |
| C1 -C7      | 1.4644(19) | C12-H12A    | 0.9700     |
| C1 -C2      | 1.4132(19) | C12-H12B    | 0.9700     |
| C2-C3       | 1.3894(19) | C15-H15A    | 0.9600     |
| C3-C4       | 1.378(2)   | C15-H15B    | 0.9600     |
| C4-C5       | 1.382(2)   | C15 -H15C   | 0.9600     |
| C5-C6       | 1.369(2)   | C16-H16A    | 0.9600     |
| C7-C8       | 1.530(2)   | C16-H16B    | 0.9600     |
| C9-C10      | 1.517(2)   | C16-H16C    | 0.9600     |
| C10-C11     | 1.519(2)   | C17-H17A    | 0.9600     |
| C11-C12     | 1.516(2)   | C17-H17B    | 0.9600     |
| C14-C16     | 1.502(2)   | C17-H17C    | 0.9600     |
| C13-O2-C14  | 120.42(11) | O1-C13-O2   | 126.60(13) |
| C2-N1-C13   | 126.25(12) | O2-C13-N1   | 107.54(11) |
| C8-N2-C9    | 126.41(12) | O2-C14-C16  | 110.34(12) |
| C8-N2-C12   | 121.20(12) | O2-C14-C17  | 109.33(12) |
| C9-N2-C12   | 112.24(12) | C15-C14-C17 | 110.63(15) |
| C13-N1-H1A  | 116.7(11)  | C1-C14-C17  | 113.20(15) |

|               |            |               |            |
|---------------|------------|---------------|------------|
| C2-N1-H1A     | 115.1(11)  | C15-C14-C16   | 110.98(15) |
| C6-C1-C7      | 118.64(13) | O2-C14-C15    | 101.76(13) |
| C2-C1-C7      | 122.54(12) | C2-C3-H3      | 120.00     |
| C2-C1-C6      | 118.82(13) | C4-C3-H3      | 120.00     |
| N1-C2-C1      | 118.80(12) | C3-C4-H4      | 119.00     |
| N1-C2-C3      | 122.17(12) | C5-C4-H4      | 119.00     |
| C1-C2-C3      | 119.04(12) | C4-C5-H5      | 121.00     |
| C2-C3-C4      | 120.37(13) | C6-C5-H5      | 120.00     |
| C3-C4-C5      | 121.24(15) | C1-C6-H6      | 119.00     |
| C4-C5-C6      | 119.10(14) | C5-C6-H6      | 119.00     |
| C1-C6-C5      | 121.44(14) | N2-C9-H9A     | 111.00     |
| O3-C7-C1      | 124.74(13) | N2-C9-H9B     | 111.00     |
| O3-C7-C8      | 116.91(12) | C10-C9-H9A    | 111.00     |
| C1-C7-C8      | 118.13(12) | C10-C9-H9B    | 111.00     |
| O4-C8-N2      | 124.92(13) | H9A-C9-H9B    | 109.00     |
| N2-C8-C7      | 117.60(12) | C9-C10-H10A   | 111.00     |
| O4-C8-C7      | 117.32(13) | C9-C10-H10B   | 111.00     |
| N2-C9-C10     | 102.49(12) | C11-C10-H10A  | 111.00     |
| C9-C10-C11    | 103.72(13) | C11-C10-H10B  | 111.00     |
| C10-C11-C12   | 103.68(13) | H10A-C10-H10B | 109.00     |
| N2-C12-C11    | 103.32(12) | C10-C11-H11A  | 111.00     |
| O1-C13-N1     | 125.86(13) | C10-C11-H11B  | 111.00     |
| C12-C11-H11A  | 111.00     | H15B-C15-H15C | 109.00     |
| C12-C11-H11B  | 111.00     | C14-C16-H16A  | 109.00     |
| H11A-C11-H11B | 109.00     | C14-C16-H16B  | 110.00     |
| N2-C12-H12A   | 111.00     | C14-C16-H16C  | 109.00     |
| N2-C12-H12B   | 111.00     | H16A-C16-H16B | 110.00     |
| C11-C12-H12A  | 111.00     | H16A-C16-H16C | 109.00     |
| C11-C12-H12B  | 111.00     | H16B-C16-H16C | 109.00     |
| H12A-C12-H12B | 109.00     | C14-C17-H17A  | 109.00     |
| C14-C15-H15A  | 109.00     | C14-C17-H17B  | 109.00     |
| C14-C15-H15B  | 110.00     | C14-C17-H17C  | 109.00     |
| C14-C15-H15C  | 110.00     | H17A-C17-H17B | 109.00     |
| H15A-C15-H15B | 109.00     | H17A-C17-H17C | 110.00     |
| H15A-C15-H15C | 109.00     | H17B-C17-H17C | 109.00     |

## Computational Data

The geometries listed below were optimized at the B3LYP/6-31G(d,p) level in the gas phase. Cartesian coordinates of all optimized geometries with their corresponding Codes (as in text). Cartesian coordinates of all Reactants and Products.

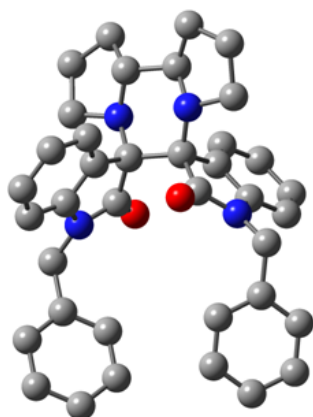

14

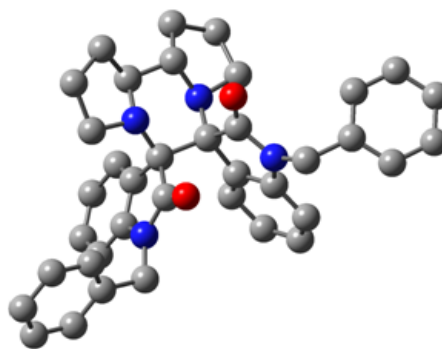

15

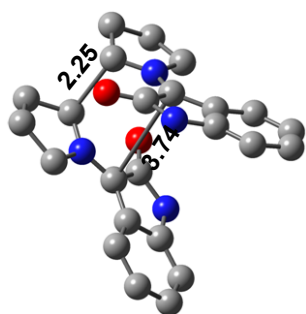

23 (TS)

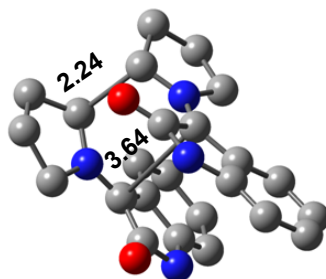

24 (TS)

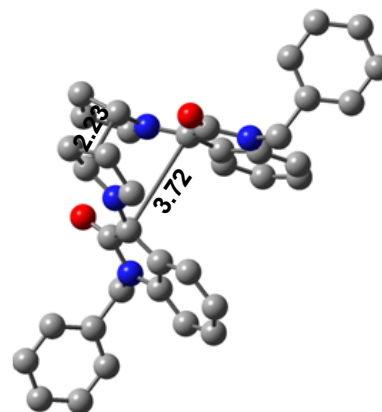

27 (TS)

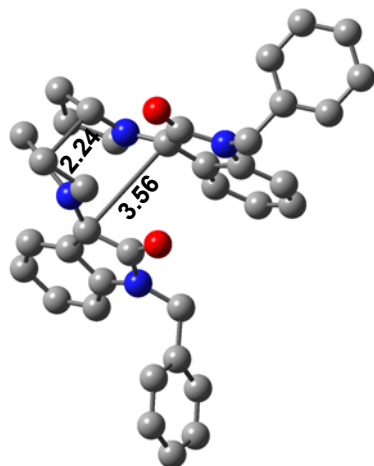

28 (TS)

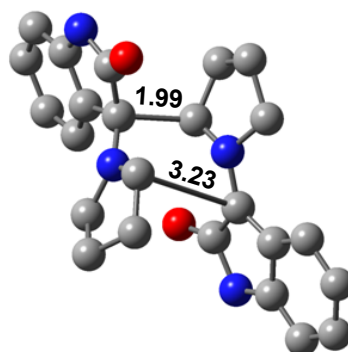

25 (TS)

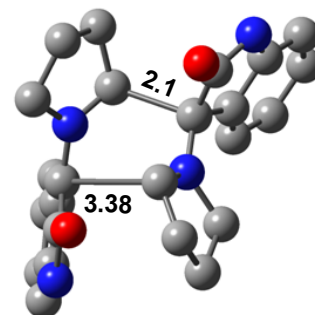

26 (TS)

AMY of R = H

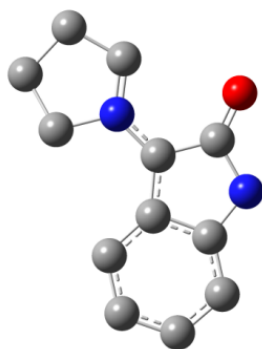

|   |             |             |             |
|---|-------------|-------------|-------------|
| C | -3.37099800 | 0.36368300  | 0.04867800  |
| C | -2.01911100 | 0.67805300  | 0.03399900  |
| C | -0.99882500 | -0.32203400 | -0.01867200 |
| C | -1.40476900 | -1.66481000 | -0.07474300 |
| C | -2.76606200 | -1.98295100 | -0.05854000 |
| C | -3.74154200 | -0.98484500 | 0.00558600  |
| H | -4.12076200 | 1.14872700  | 0.09048400  |
| H | -0.68320100 | -2.47086000 | -0.14187300 |
| H | -3.06520100 | -3.02613500 | -0.10069500 |
| H | -4.79358400 | -1.25254200 | 0.01694000  |
| C | 0.25068100  | 0.40302700  | -0.02246300 |
| C | -0.02200200 | 1.82759200  | 0.01193700  |
| O | 0.75927500  | 2.78913000  | 0.01337800  |
| C | 1.83660700  | -1.52018000 | -0.01867900 |
| C | 2.66031600  | 0.64914600  | -0.09046400 |
| C | 3.34211700  | -1.59834700 | 0.27287600  |
| H | 1.56042500  | -1.93061100 | -0.99487600 |
| H | 1.21914300  | -1.99375500 | 0.74455900  |
| C | 3.88153000  | -0.20815300 | -0.13481900 |
| H | 3.50415400  | -1.76314900 | 1.34162600  |
| H | 3.81871400  | -2.41889500 | -0.26744300 |
| H | 4.66964200  | 0.15167000  | 0.53599900  |
| H | 4.31891000  | -0.21823200 | -1.14552900 |
| N | 1.54477400  | -0.05908200 | -0.03676300 |
| H | 2.58555400  | 1.72724100  | -0.13491700 |
| N | -1.41462200 | 1.92704100  | 0.05626700  |
| H | -1.88669500 | 2.81669300  | 0.08399300  |

AMY of R = Bn

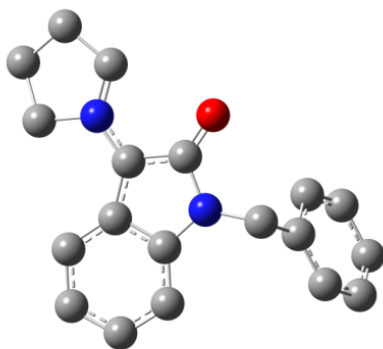

|   |             |            |             |
|---|-------------|------------|-------------|
| C | 0.98983700  | 2.49478400 | -0.36528000 |
| C | 0.21489200  | 1.34485800 | -0.44783400 |
| C | -1.14981400 | 1.31312000 | -0.02316300 |

|   |             |             |             |
|---|-------------|-------------|-------------|
| C | -1.71244900 | 2.50113100  | 0.46709100  |
| C | -0.93397200 | 3.65980600  | 0.54609900  |
| C | 0.40229100  | 3.65990400  | 0.14007900  |
| H | 2.02966700  | 2.48616200  | -0.67398300 |
| H | -2.74946200 | 2.54832200  | 0.77935000  |
| H | -1.38118100 | 4.57207200  | 0.92986400  |
| H | 0.99281300  | 4.56785800  | 0.21471600  |
| C | -1.59508800 | -0.03891600 | -0.26455600 |
| C | -0.50822200 | -0.79610300 | -0.84447400 |
| O | -0.46470000 | -1.98815300 | -1.19590200 |
| C | -3.91146000 | 0.12481800  | 0.64166900  |
| C | -3.18093800 | -1.87174400 | -0.29066300 |
| C | -4.93391500 | -0.95432600 | 1.02579700  |
| H | -4.29442700 | 0.84825100  | -0.08469200 |
| H | -3.50954000 | 0.66964100  | 1.49584300  |
| C | -4.59441200 | -2.14674800 | 0.10267200  |
| H | -4.79503600 | -1.24033000 | 2.07199400  |
| H | -5.96055300 | -0.60089700 | 0.90985600  |
| H | -4.70783500 | -3.11412200 | 0.60457100  |
| H | -5.24962200 | -2.18080300 | -0.78191000 |
| N | -2.80658600 | -0.63540500 | -0.00835900 |
| H | -2.47721300 | -2.52355600 | -0.79014600 |
| N | 0.57100800  | 0.09119600  | -0.93657500 |
| C | 1.85041200  | -0.29712000 | -1.50829800 |
| H | 1.63763200  | -1.18124900 | -2.11721400 |
| C | 2.91969100  | -0.62517900 | -0.48045500 |
| C | 4.11777400  | 0.09267000  | -0.42951500 |
| C | 2.72024500  | -1.67899600 | 0.42276200  |
| C | 5.10187000  | -0.22764600 | 0.50905800  |
| H | 4.28631000  | 0.90675000  | -1.13096300 |
| C | 3.69928000  | -1.99795900 | 1.36137700  |
| H | 1.79558500  | -2.24739600 | 0.37356900  |
| C | 4.89316200  | -1.27232100 | 1.40825100  |
| H | 6.02722200  | 0.34076700  | 0.53764400  |
| H | 3.53456200  | -2.81769000 | 2.05512800  |
| H | 5.65562400  | -1.52289500 | 2.14022200  |
| H | 2.19700200  | 0.49960300  | -2.17578400 |

### Trans (8)

|   |             |             |             |
|---|-------------|-------------|-------------|
| C | 3.84541400  | -2.06345900 | 0.12965900  |
| C | 2.57377300  | -1.61948900 | 0.46826100  |
| C | 1.97674000  | -0.49714100 | -0.12642500 |
| C | 2.67113000  | 0.17810500  | -1.12420600 |
| C | 3.95833700  | -0.24767400 | -1.47899100 |
| C | 4.53925100  | -1.35118700 | -0.85477700 |
| H | 4.28249300  | -2.93653200 | 0.60496200  |
| H | 2.20012100  | 0.99630400  | -1.65279800 |
| H | 4.50028200  | 0.27898000  | -2.25835400 |
| H | 5.53606400  | -1.67351500 | -1.14118200 |
| C | 0.59997400  | -0.26945800 | 0.51424400  |
| C | 0.51169200  | -1.47779700 | 1.51607000  |
| O | -0.38718500 | -1.74082000 | 2.28961300  |
| C | -0.59973800 | -0.26967000 | -0.51421900 |
| C | 0.54293000  | 2.21573500  | 0.53219700  |
| H | 1.52481000  | 2.31058600  | 0.03439500  |
| C | -0.54318000 | 2.21557200  | -0.53258800 |
| H | -1.52510600 | 2.31042200  | -0.03487900 |
| C | -1.97648000 | -0.49753100 | 0.12650700  |
| C | -0.51123100 | -1.47811200 | -1.51586600 |
| C | -2.57329500 | -1.62004800 | -0.46805600 |
| O | 0.38769000  | -1.74104100 | -2.28939200 |
| N | -1.68799900 | -2.18220500 | -1.39801000 |



|   |             |             |             |
|---|-------------|-------------|-------------|
| H | -1.87476700 | -2.99163400 | -1.97110800 |
| N | -0.46414200 | 0.96570000  | -1.30267500 |
| N | 0.46408300  | 0.96601200  | 1.30246800  |
| C | -3.84488200 | -2.06418400 | -0.12945800 |
| H | -4.28178700 | -2.93741600 | -0.60463000 |
| C | -2.67103600 | 0.17775000  | 1.12415200  |
| H | -2.20018200 | 0.99609500  | 1.65265700  |
| C | -3.95820100 | -0.24817600 | 1.47891200  |
| H | -4.50027900 | 0.27851100  | 2.25816200  |
| C | -4.53889900 | -1.35187300 | 0.85482100  |
| H | -5.53567200 | -1.67433000 | 1.14122000  |
| C | -0.43912300 | 3.28457100  | -1.63178700 |
| H | -0.94774800 | 4.20910500  | -1.34503400 |
| H | 0.61184600  | 3.52939600  | -1.81731700 |
| C | -1.35269700 | 1.15358300  | -2.45516400 |
| H | -2.41440300 | 1.03222200  | -2.17955000 |
| H | -1.11733300 | 0.42909000  | -3.23911900 |
| C | -1.07252500 | 2.61210100  | -2.88311300 |
| H | -0.38062000 | 2.64260000  | -3.72860400 |
| H | -1.99315100 | 3.11097000  | -3.19742000 |
| C | 0.43878900  | 3.28512300  | 1.63112700  |
| H | 0.94859800  | 4.20904600  | 1.34450900  |
| H | -0.61209000 | 3.53111100  | 1.81560300  |
| C | 1.07045100  | 2.61251600  | 2.88326600  |
| H | 1.99010700  | 3.11186300  | 3.19962400  |
| H | 0.37687300  | 2.64189800  | 3.72742000  |
| C | 1.35225600  | 1.15440200  | 2.45513000  |
| H | 1.11742300  | 0.42958900  | 3.23893300  |
| H | 2.41414300  | 1.03418500  | 2.17968500  |
| N | 1.68864100  | -2.18161400 | 1.39838800  |
| H | 1.87556700  | -2.99086500 | 1.97168800  |

### Cis (9)

|   |             |             |             |
|---|-------------|-------------|-------------|
| C | -1.92887600 | -1.56817800 | 0.73527700  |
| H | -2.06059300 | -2.31289300 | -0.06217800 |
| N | -1.78130700 | 0.28611700  | -0.83894300 |
| N | -0.48658600 | -1.35134000 | 0.99974200  |
| C | -0.36782200 | 0.52801400  | -0.56141300 |
| C | -0.37759200 | 1.84182900  | 1.77407400  |
| C | -0.03239600 | 3.04342000  | 2.41136100  |
| C | 0.60290700  | 4.06392200  | 1.70369200  |
| C | 0.91454200  | 3.91003900  | 0.34793000  |
| H | -0.82932600 | 1.03375700  | 2.33540300  |
| H | -0.25756500 | 3.17541600  | 3.46511100  |
| H | 0.86615000  | 4.98937200  | 2.20733500  |
| H | 1.41873000  | 4.69749500  | -0.20420300 |
| C | 2.46371800  | -0.06311900 | 1.16665400  |
| C | 3.86522400  | -0.10249500 | 1.18940200  |
| C | 4.56772400  | -0.79666800 | 0.20385500  |
| C | 3.89456600  | -1.48025900 | -0.81452800 |
| H | 1.92033300  | 0.47220200  | 1.93574200  |
| H | 4.40423700  | 0.41001000  | 1.97993400  |
| H | 5.65345700  | -0.81746700 | 0.22799300  |
| H | 4.43903800  | -2.03522000 | -1.57231700 |
| C | -2.41518400 | -2.14469100 | 2.07276200  |
| C | -0.03405600 | -2.58983500 | 1.64591700  |
| C | -1.18172400 | -2.91220300 | 2.62963100  |
| H | -2.70309800 | -1.33511600 | 2.75238500  |
| H | -3.28819300 | -2.78929900 | 1.93915500  |
| H | 0.08272500  | -3.41224400 | 0.91835400  |
| H | 0.92894000  | -2.44024000 | 2.13984200  |
| H | -1.35624300 | -3.98996500 | 2.68587800  |

|   |             |             |             |
|---|-------------|-------------|-------------|
| H | -0.93646100 | -2.56994100 | 3.63868400  |
| C | -3.96404400 | -0.37225600 | -0.35044500 |
| C | -4.02591200 | 0.81177100  | -1.35552200 |
| C | -2.58326400 | 1.36943500  | -1.41014100 |
| H | -4.75203100 | -0.32690700 | 0.40665600  |
| H | -4.05707600 | -1.32524600 | -0.87958500 |
| H | -4.34903300 | 0.46565600  | -2.34020900 |
| H | -4.72836900 | 1.58601700  | -1.03465300 |
| H | -2.25308900 | 1.58996700  | -2.42940400 |
| H | -2.51102700 | 2.29879800  | -0.81763200 |
| C | -2.56335300 | -0.26695000 | 0.27196200  |
| C | 0.29723900  | -1.86205900 | -1.36121100 |
| C | 2.50424900  | -1.43683700 | -0.81630900 |
| C | 1.77844800  | -0.71996300 | 0.15195200  |
| O | -0.63961000 | -2.43207700 | -1.88112300 |
| C | 0.28521300  | -0.85147300 | -0.13945700 |
| C | -0.08519700 | 1.67262600  | 0.42406800  |
| C | 0.56247300  | 2.71309300  | -0.26352900 |
| O | 0.38671800  | 0.50402200  | -2.94271700 |
| N | 1.62424200  | -2.07961900 | -1.68376500 |
| N | 0.77962800  | 2.33074000  | -1.59227100 |
| H | -2.60281500 | 0.43908600  | 1.12342000  |
| H | 1.88775800  | -2.68567800 | -2.44642000 |
| H | 1.26305800  | 2.87804400  | -2.28893300 |
| C | 0.30508200  | 1.06743000  | -1.86981100 |

#### Trans (14)

|   |             |             |             |
|---|-------------|-------------|-------------|
| C | 0.26832300  | 3.60963900  | -1.52132500 |
| C | -0.14321300 | 2.59297400  | -0.66721000 |
| C | -1.19076200 | 1.71647200  | -0.99108200 |
| C | -1.82735400 | 1.84957800  | -2.21941200 |
| C | -1.43520600 | 2.87470000  | -3.09088500 |
| C | -0.40356700 | 3.74505800  | -2.74185700 |
| H | 1.09607100  | 4.26182400  | -1.26611800 |
| H | -2.58960400 | 1.13849600  | -2.51018700 |
| H | -1.92896000 | 2.97922800  | -4.05204800 |
| H | -0.10182300 | 4.53042300  | -3.42878500 |
| C | -1.42084500 | 0.76532600  | 0.18647600  |
| C | -0.25480500 | 1.17839000  | 1.14959600  |
| O | 0.00569700  | 0.70725400  | 2.24260800  |
| C | -1.41987100 | -0.76550800 | -0.18638700 |
| C | -3.91230400 | 0.72705800  | 0.21411000  |
| H | -3.99556900 | 1.36080200  | -0.68763200 |
| C | -3.91151000 | -0.72999800 | -0.21454400 |
| H | -3.99468700 | -1.36386800 | 0.68713300  |
| C | -1.18877700 | -1.71649600 | 0.99109400  |
| C | -0.25327200 | -1.17715300 | -1.14949300 |
| C | -0.14063000 | -2.59215600 | 0.66691100  |
| O | 0.00708900  | -0.70534300 | -2.24223800 |
| N | 0.39208500  | -2.26330300 | -0.59430700 |
| N | -2.66688400 | -1.01135500 | -0.94368300 |
| N | -2.66818000 | 1.00951900  | 0.94370000  |
| C | 0.27185000  | -3.60861600 | 1.52082100  |
| H | 1.10011700  | -4.26005900 | 1.26540000  |
| C | -1.82510700 | -1.85029300 | 2.21948500  |
| H | -2.58789600 | -1.13986300 | 2.51043100  |
| C | -1.43202100 | -2.87523700 | 3.09074700  |
| H | -1.92554400 | -2.98029100 | 4.05197100  |
| C | -0.39975000 | -3.74473700 | 2.74143500  |
| H | -0.09728100 | -4.52995800 | 3.42820900  |
| C | -4.98879800 | -1.15189100 | -1.22519600 |
| H | -5.90958000 | -1.46633900 | -0.72630300 |
| H | -5.23735300 | -0.30975400 | -1.87931800 |

|   |             |             |             |
|---|-------------|-------------|-------------|
| C | -2.85600200 | -2.33231700 | -1.55695000 |
| H | -2.71291800 | -3.14854600 | -0.82872600 |
| H | -2.14746400 | -2.47655100 | -2.37685100 |
| C | -4.32404300 | -2.29668800 | -2.03953600 |
| H | -4.37761500 | -2.09001100 | -3.11148100 |
| H | -4.81302700 | -3.25976100 | -1.86993100 |
| C | -4.99069800 | 1.14805600  | 1.22410900  |
| H | -5.91052200 | 1.46385800  | 0.72431200  |
| H | -5.24088000 | 0.30510100  | 1.87654700  |
| C | -4.32647300 | 2.29122100  | 2.04128200  |
| H | -4.81680800 | 3.25427900  | 1.87555600  |
| H | -4.37842700 | 2.08081300  | 3.11258200  |
| C | -2.85907400 | 2.33000100  | 1.55734800  |
| H | -2.15012500 | 2.47544200  | 2.37664200  |
| H | -2.71823200 | 3.14661600  | 0.82907800  |
| N | 0.38977000  | 2.26481200  | 0.59408700  |
| C | 1.32943300  | -3.07653600 | -1.36435500 |
| H | 1.07059400  | -4.12917900 | -1.20693200 |
| H | 1.13291700  | -2.83005700 | -2.41218200 |
| C | 2.79733800  | -2.84789200 | -1.05735700 |
| C | 3.59231200  | -3.87990200 | -0.54915600 |
| C | 3.38753800  | -1.60746300 | -1.33422800 |
| C | 4.95527200  | -3.68187300 | -0.31776100 |
| H | 3.14643300  | -4.85028900 | -0.34267700 |
| C | 4.74826100  | -1.40891700 | -1.10708900 |
| H | 2.77620400  | -0.80600400 | -1.73933900 |
| C | 5.53586800  | -2.44537700 | -0.59776500 |
| H | 5.56027900  | -4.49311100 | 0.07686700  |
| H | 5.19333100  | -0.44407400 | -1.32906700 |
| H | 6.59706400  | -2.29000100 | -0.42529700 |
| C | 1.32700400  | 3.07867400  | 1.36363400  |
| H | 1.06821400  | 4.13115900  | 1.20524400  |
| H | 1.13028800  | 2.83314400  | 2.41166400  |
| C | 2.79497500  | 2.84979000  | 1.05708600  |
| C | 3.58980800  | 3.88114500  | 0.54733000  |
| C | 3.38536700  | 1.60989300  | 1.33593200  |
| C | 4.95282300  | 3.68300100  | 0.31636700  |
| H | 3.14377700  | 4.85113500  | 0.33932100  |
| C | 4.74614600  | 1.41123800  | 1.10922500  |
| H | 2.77411600  | 0.80895800  | 1.74219000  |
| C | 5.53361500  | 2.44704900  | 0.59837100  |
| H | 5.55772400  | 4.49373200  | -0.07945900 |
| H | 5.19138800  | 0.44682300  | 1.33273200  |
| H | 6.59486300  | 2.29160600  | 0.42627900  |

**Cis (15)**

|   |             |             |             |
|---|-------------|-------------|-------------|
| C | -0.95531200 | 3.08681200  | -0.74355000 |
| H | -1.54875600 | 2.72737400  | -1.59580600 |
| N | 0.93935300  | 1.64098300  | -1.26732600 |
| N | -1.18156300 | 2.22074500  | 0.43747200  |
| C | 0.74025000  | 0.80237900  | -0.08724500 |
| C | 1.74925600  | 2.25718800  | 1.91468600  |
| C | 2.72968100  | 2.29934000  | 2.91774500  |
| C | 3.59644600  | 1.22339500  | 3.10327600  |
| C | 3.50265600  | 0.07787500  | 2.30375500  |
| H | 1.04872200  | 3.07427200  | 1.79799400  |
| H | 2.81008700  | 3.17572600  | 3.55339900  |
| H | 4.35580200  | 1.26741600  | 3.87849600  |
| H | 4.18114100  | -0.75522200 | 2.44688600  |
| C | -0.81425500 | 0.07662100  | 2.80954700  |
| C | -1.23671200 | -0.90446100 | 3.71826100  |
| C | -1.97446200 | -2.00221100 | 3.27618800  |
| C | -2.32272000 | -2.14320900 | 1.92787700  |

|   |             |             |             |
|---|-------------|-------------|-------------|
| H | -0.24473400 | 0.93126700  | 3.15430000  |
| H | -0.98973400 | -0.80439600 | 4.77051000  |
| H | -2.29844000 | -2.75660500 | 3.98741600  |
| H | -2.92707200 | -2.97852300 | 1.59381700  |
| C | -1.50425900 | 4.43862200  | -0.25996800 |
| C | -2.55282700 | 2.52082700  | 0.86578400  |
| C | -2.61864400 | 4.06004900  | 0.75854800  |
| H | -0.71420700 | 5.01661900  | 0.23166200  |
| H | -1.88183600 | 5.03900600  | -1.09219700 |
| H | -3.30209800 | 2.06109100  | 0.19720200  |
| H | -2.73479100 | 2.14907600  | 1.87669300  |
| H | -3.60896900 | 4.38924200  | 0.43281800  |
| H | -2.42526700 | 4.52215800  | 1.73042400  |
| C | 0.86983700  | 3.60611400  | -2.51919400 |
| C | 2.12846300  | 2.80056100  | -2.94665500 |
| C | 2.26389400  | 1.67694000  | -1.89094000 |
| H | 1.04787200  | 4.68467200  | -2.48454500 |
| H | 0.04509300  | 3.42040300  | -3.21352600 |
| H | 1.99807800  | 2.38355800  | -3.94821500 |
| H | 3.02721700  | 3.42324200  | -2.96654200 |
| H | 2.50531500  | 0.70649000  | -2.33358500 |
| H | 3.05934700  | 1.92821400  | -1.16758500 |
| C | 0.51215200  | 3.03884000  | -1.13724200 |
| C | -1.63130300 | 0.09248600  | -0.87207300 |
| C | -1.89866800 | -1.15873000 | 1.03998200  |
| C | -1.13326800 | -0.05762400 | 1.46462700  |
| O | -1.85511700 | 0.47959200  | -2.00504800 |
| C | -0.80658500 | 0.81805800  | 0.26097600  |
| C | 1.64623500  | 1.13152200  | 1.10426800  |
| C | 2.52170900  | 0.05322700  | 1.31861400  |
| O | 0.75224700  | -1.37417900 | -1.30365400 |
| N | -2.16407500 | -1.06553000 | -0.33035900 |
| N | 2.22515800  | -0.99195000 | 0.42618100  |
| H | 1.10891400  | 3.56825900  | -0.36982200 |
| C | 1.19834100  | -0.65109600 | -0.42820000 |
| C | 2.85476700  | -2.30935600 | 0.40066800  |
| H | 2.98548500  | -2.64810900 | 1.43341800  |
| H | 2.12890600  | -2.96832200 | -0.08378700 |
| C | -2.87329600 | -2.04770600 | -1.14035900 |
| H | -2.49166500 | -3.04347400 | -0.89071800 |
| H | -2.58800300 | -1.82775300 | -2.17289500 |
| C | -4.38395700 | -2.00726200 | -0.99317700 |
| C | -5.09546300 | -3.13183100 | -0.56492400 |
| C | -5.09023900 | -0.83908500 | -1.31335400 |
| C | -6.48715400 | -3.09429400 | -0.44875200 |
| H | -4.55886300 | -4.04725100 | -0.32528800 |
| C | -6.47799500 | -0.79858300 | -1.19479500 |
| H | -4.54182700 | 0.03000300  | -1.66582500 |
| C | -7.18093900 | -1.92599400 | -0.76060500 |
| H | -7.02553700 | -3.97620300 | -0.11349500 |
| H | -7.01436300 | 0.11171700  | -1.44744100 |
| H | -8.26277300 | -1.89293400 | -0.66975000 |
| C | 4.17679900  | -2.35017500 | -0.34483100 |
| C | 5.37404600  | -2.62139900 | 0.32394100  |
| C | 4.20628100  | -2.13167600 | -1.72982600 |
| C | 6.58492300  | -2.66363300 | -0.37115600 |
| H | 5.36124100  | -2.80880800 | 1.39522700  |
| C | 5.41395300  | -2.17003900 | -2.42417500 |
| H | 3.27485800  | -1.94382700 | -2.25661200 |
| C | 6.60717400  | -2.43415600 | -1.74617800 |
| H | 7.50722800  | -2.87500100 | 0.16216800  |
| H | 5.42437700  | -2.00103700 | -3.49709500 |
| H | 7.54726500  | -2.46538100 | -2.28913900 |

**Trans (19)**

|   |             |             |             |
|---|-------------|-------------|-------------|
| C | -5.05235400 | 1.07207300  | -0.90860700 |
| C | -4.95872400 | -0.06188500 | -0.09161400 |
| C | -3.68823000 | -0.48452400 | 0.27716800  |
| C | -2.52137000 | 0.17677800  | -0.14448400 |
| C | -2.63371000 | 1.31613400  | -0.93543600 |
| C | -3.90916600 | 1.75666800  | -1.32117800 |
| H | -6.03302000 | 1.42492600  | -1.21410800 |
| H | -5.84882700 | -0.58490000 | 0.24518000  |
| H | -1.74870500 | 1.87151100  | -1.22544500 |
| H | -4.00469100 | 2.64287400  | -1.94066700 |
| C | -1.30989000 | -0.55724600 | 0.42824800  |
| C | -1.97768900 | -1.67879400 | 1.28139700  |
| N | -3.34051200 | -1.56327200 | 1.10685400  |
| H | -3.99239600 | -2.17916100 | 1.57008500  |
| O | -1.41136700 | -2.50415700 | 1.97171700  |
| N | -0.41398900 | -1.20554500 | -0.54069900 |
| C | -0.40017900 | 0.29028300  | 1.34766200  |
| H | 0.22603300  | -0.43418900 | 1.89094600  |
| C | 0.40013700  | -0.29029300 | -1.34752100 |
| H | -0.22614400 | 0.43417000  | -1.89073600 |
| N | 0.41402900  | 1.20548700  | 0.54085900  |
| C | 1.30988500  | 0.55724000  | -0.42812400 |
| C | 1.97761000  | 1.67880500  | -1.28131800 |
| C | 2.52142700  | -0.17677900 | 0.14449800  |
| C | 3.68825000  | 0.48444900  | -0.27736100 |
| C | 2.63383200  | -1.31606200 | 0.93554400  |
| H | 1.74884300  | -1.87137800 | 1.22572100  |
| C | 4.95878000  | 0.06179500  | 0.09128100  |
| H | 5.84885300  | 0.58476200  | -0.24566700 |
| C | 3.90932400  | -1.75661600 | 1.32114300  |
| H | 4.00490400  | -2.64277100 | 1.94069600  |
| C | 5.05248100  | -1.07209400 | 0.90836100  |
| H | 6.03317500  | -1.42495800 | 1.21376100  |
| O | 1.41121400  | 2.50424900  | -1.97148300 |
| N | 3.34046000  | 1.56317300  | -1.10705000 |
| H | 3.99230800  | 2.17903900  | -1.57036100 |
| C | -1.08415700 | 1.22012500  | 2.37369300  |
| H | -2.10433000 | 1.46291100  | 2.06812100  |
| H | -1.13536600 | 0.73350300  | 3.35117200  |
| C | -0.20209500 | 2.49991600  | 2.39623200  |
| H | -0.75644800 | 3.34827900  | 1.98652800  |
| H | 0.12146700  | 2.77071100  | 3.40469400  |
| C | 0.99156500  | 2.16393000  | 1.48637300  |
| H | 1.38221400  | 3.03756300  | 0.95614900  |
| H | 1.81419300  | 1.72089100  | 2.07452700  |
| C | 1.08408900  | -1.22005800 | -2.37363400 |
| H | 2.10423600  | -1.46293700 | -2.06804200 |
| H | 1.13536100  | -0.73333200 | -3.35105200 |
| C | 0.20197100  | -2.49980200 | -2.39633100 |
| H | 0.75634900  | -3.34833400 | -1.98701400 |
| H | -0.12184000 | -2.77030100 | -3.40480000 |
| C | -0.99154700 | -2.16400400 | -1.48618700 |
| H | -1.38199700 | -3.03771800 | -0.95595000 |
| H | -1.81430700 | -1.72102600 | -2.07418400 |

**Cis (20)**

|   |             |             |             |
|---|-------------|-------------|-------------|
| C | -0.53771000 | -0.55247200 | -1.10059500 |
| H | -0.34408200 | 0.44077800  | -1.54682000 |
| N | -0.50991700 | 0.36045100  | 1.14206300  |
| N | 0.71207600  | -1.23650800 | -0.78035400 |
| C | 0.70577500  | -0.41509300 | 1.47064500  |

|   |             |             |             |
|---|-------------|-------------|-------------|
| C | -2.64376700 | 1.90119400  | -0.68722200 |
| C | -3.89115100 | 2.47363000  | -0.97694200 |
| C | -5.06318000 | 1.74244100  | -0.77863300 |
| C | -5.02485000 | 0.43199500  | -0.28589300 |
| H | -1.73106500 | 2.47121500  | -0.83244000 |
| H | -3.94477700 | 3.48989900  | -1.35423700 |
| H | -6.02443200 | 2.19359700  | -1.00632500 |
| H | -5.93819600 | -0.13367600 | -0.12911800 |
| C | 1.86782000  | 1.94350100  | -0.62224700 |
| C | 2.79603300  | 2.91732800  | -1.02106700 |
| C | 4.16012300  | 2.62797200  | -1.03901500 |
| C | 4.63395300  | 1.36929000  | -0.64858600 |
| H | 0.81213100  | 2.17981600  | -0.56898600 |
| H | 2.44905400  | 3.90437100  | -1.31076800 |
| H | 4.87021500  | 3.38893800  | -1.34925800 |
| H | 5.69713400  | 1.14820200  | -0.64416600 |
| C | -1.15121300 | -1.45834400 | -2.18589600 |
| C | 1.29622300  | -1.63003900 | -2.06312900 |
| C | 0.07740300  | -2.10699900 | -2.88206600 |
| H | -1.77491200 | -2.23271600 | -1.73299300 |
| H | -1.77732200 | -0.88479600 | -2.87366300 |
| H | 1.79042700  | -0.78275500 | -2.57107000 |
| H | 2.04195300  | -2.41663000 | -1.91415700 |
| H | 0.16582500  | -1.80624100 | -3.92950300 |
| H | -0.00226400 | -3.19639000 | -2.85934600 |
| C | -1.08045100 | 0.75419300  | 2.43494300  |
| C | 0.15682400  | 1.23098600  | 3.21006600  |
| C | 1.31571100  | 0.35104500  | 2.66598300  |
| H | -1.55262700 | -0.09812400 | 2.95556400  |
| H | -1.83684800 | 1.53258700  | 2.30248300  |
| H | 0.34690400  | 2.28545100  | 2.99061700  |
| H | 0.02349900  | 1.13498200  | 4.29078900  |
| H | 2.15980900  | 0.97323500  | 2.35779900  |
| H | 1.68129600  | -0.35641000 | 3.41448300  |
| C | -1.39803400 | -0.26974300 | 0.16336000  |
| C | 2.76125700  | -1.54763100 | 0.52918400  |
| C | 3.69751000  | 0.41946300  | -0.25915800 |
| C | 2.31497000  | 0.67927700  | -0.25463200 |
| O | 2.69130200  | -2.67012900 | 0.98403500  |
| C | 1.57638600  | -0.57965200 | 0.20672600  |
| C | -2.58965300 | 0.60384400  | -0.20042600 |
| C | -3.77878000 | -0.11518400 | -0.00231800 |
| O | -1.61450800 | -2.53861200 | 1.22777500  |
| N | 3.92809600  | -0.88456100 | 0.19762800  |
| N | -3.47298400 | -1.38373600 | 0.50234000  |
| H | 4.83498100  | -1.30632200 | 0.33306600  |
| H | -4.14710400 | -2.06278100 | 0.82550500  |
| C | -2.11142500 | -1.56247400 | 0.70208700  |
| H | 0.44650300  | -1.43698800 | 1.77532500  |

Cartesian coordinates of all Transition states.

**TS (23)** of Trans isomer (8)

|   |             |             |             |
|---|-------------|-------------|-------------|
| C | -2.59956400 | 1.12457400  | 0.01081800  |
| H | -2.76197100 | 1.14588700  | 1.08046000  |
| N | -1.40487200 | -1.59340800 | 0.41152700  |
| N | -1.40638400 | 1.59239900  | -0.41155100 |
| C | -0.29712100 | -1.83261300 | -0.36434500 |
| C | 1.64529800  | -2.63971200 | 1.23790900  |
| C | 2.96740700  | -3.08772800 | 1.22200200  |
| C | 3.67611800  | -3.21426300 | 0.02269900  |
| C | 3.07081300  | -2.88890500 | -1.19550500 |
| H | 1.13409300  | -2.54812000 | 2.18818500  |
| H | 3.45166700  | -3.33914400 | 2.16091100  |

|   |             |             |             |
|---|-------------|-------------|-------------|
| H | 4.70364500  | -3.56442500 | 0.03361300  |
| H | 3.61302300  | -2.97930200 | -2.13240900 |
| C | 1.64308400  | 2.64068900  | -1.23789500 |
| C | 2.96485900  | 3.08968800  | -1.22200500 |
| C | 3.67339800  | 3.21700800  | -0.02268300 |
| C | 3.06826600  | 2.89144500  | 1.19555200  |
| H | 1.13200500  | 2.54849600  | -2.18818000 |
| H | 3.44899500  | 3.34125500  | -2.16093800 |
| H | 4.70066400  | 3.56793500  | -0.03360600 |
| H | 3.61036300  | 2.98242400  | 2.13246600  |
| C | -3.65445200 | 1.42862400  | -1.01976200 |
| C | -1.41422600 | 1.88185700  | -1.86780300 |
| C | -2.84224700 | 1.54313100  | -2.32684000 |
| H | -4.43552900 | 0.66400100  | -1.07396500 |
| H | -4.15426000 | 2.37549400  | -0.76880000 |
| H | -1.14552600 | 2.93361300  | -2.00277000 |
| H | -0.67648800 | 1.24891800  | -2.36599400 |
| H | -3.24212400 | 2.30220300  | -3.00274400 |
| H | -2.82240500 | 0.58616400  | -2.84948800 |
| C | -3.65311000 | -1.43187000 | 1.01962400  |
| C | -2.84083300 | -1.54536400 | 2.32673500  |
| C | -1.41254500 | -1.88296700 | 1.86775200  |
| H | -4.15189200 | -2.37930000 | 0.76873000  |
| H | -4.43500900 | -0.66808100 | 1.07374600  |
| H | -2.82181400 | -0.58824500 | 2.84913900  |
| H | -3.24004400 | -2.30461200 | 3.00283500  |
| H | -0.67524600 | -1.24957600 | 2.36602000  |
| H | -1.14311400 | -2.93455300 | 2.00262300  |
| C | -2.59850100 | -1.12681800 | -0.01095000 |
| C | -0.31421500 | 1.66157400  | 1.80661000  |
| C | 1.75497000  | 2.44428400  | 1.17724200  |
| C | 1.00360900  | 2.31011500  | -0.03022900 |
| O | -1.20873200 | 1.24139800  | 2.56554600  |
| C | -0.29886100 | 1.83252000  | 0.36438600  |
| C | 1.00565200  | -2.30934500 | 0.03027600  |
| C | 1.75718700  | -2.44272700 | -1.17717600 |
| O | -1.20743600 | -1.24200400 | -2.56541000 |
| N | 0.94831000  | 2.06273300  | 2.23898700  |
| N | 0.95029000  | -2.06165500 | -2.23892100 |
| H | -2.76079200 | -1.14829600 | -1.08060800 |
| H | 1.21651700  | 2.02734700  | 3.20942700  |
| H | 1.21857100  | -2.02581800 | -3.20932500 |
| C | -0.31255200 | -1.66151600 | -1.80653000 |

**TS (24) of Cis Isomer (9)**

|   |             |             |             |
|---|-------------|-------------|-------------|
| C | 0.11032600  | 2.08708300  | 1.47560100  |
| H | -0.49049500 | 2.89650000  | 1.08049800  |
| N | 1.14636600  | 1.33582700  | -1.17671000 |
| N | -0.48118200 | 0.86725100  | 1.47614700  |
| C | 1.35264200  | -0.01818700 | -1.21727900 |
| C | 3.49658000  | -0.54563000 | 0.22535100  |
| C | 4.29340600  | -1.60419400 | 0.67257600  |
| C | 3.97369200  | -2.92864100 | 0.35928100  |
| C | 2.85411300  | -3.22341500 | -0.42904900 |
| H | 3.79382800  | 0.47102600  | 0.46080400  |
| H | 5.17453800  | -1.38998100 | 1.27010900  |
| H | 4.59927200  | -3.73787700 | 0.72311000  |
| H | 2.61033100  | -4.24903000 | -0.69097800 |
| C | -1.96007100 | -2.08733500 | 1.10014900  |
| C | -2.84227700 | -3.12408400 | 0.78780800  |
| C | -4.01804000 | -2.88192400 | 0.07090200  |
| C | -4.33859800 | -1.58693700 | -0.35107400 |
| H | -1.05680700 | -2.31699600 | 1.65171100  |

|   |             |             |             |
|---|-------------|-------------|-------------|
| H | -2.60651500 | -4.13437400 | 1.10891000  |
| H | -4.69033000 | -3.70204900 | -0.16168500 |
| H | -5.24802500 | -1.38972100 | -0.91108900 |
| C | 0.99381000  | 2.21073000  | 2.68890100  |
| C | 0.19456500  | -0.07315500 | 2.40836000  |
| C | 1.35064200  | 0.74417300  | 3.00893600  |
| H | 1.87652400  | 2.83591700  | 2.51798400  |
| H | 0.43398400  | 2.67422600  | 3.51391700  |
| H | -0.54258400 | -0.39541100 | 3.15057200  |
| H | 0.54869700  | -0.94840800 | 1.86116400  |
| H | 1.46166500  | 0.56119100  | 4.07984600  |
| H | 2.28836800  | 0.46010300  | 2.52509700  |
| C | 1.44904000  | 3.61201700  | -0.72210400 |
| C | 0.33137900  | 3.49967400  | -1.77978900 |
| C | 0.42640500  | 2.05149600  | -2.27807700 |
| H | 2.40108700  | 3.93490100  | -1.16882700 |
| H | 1.21354500  | 4.32245100  | 0.07634700  |
| H | -0.64319100 | 3.65564500  | -1.31370400 |
| H | 0.45153500  | 4.21632900  | -2.59540300 |
| H | -0.52812200 | 1.56370400  | -2.46256600 |
| H | 1.04130300  | 1.94345300  | -3.17864900 |
| C | 1.56485900  | 2.19524700  | -0.22604400 |
| C | -2.45663900 | 1.50194500  | 0.12773700  |
| C | -3.46135500 | -0.55934000 | -0.03907300 |
| C | -2.25407400 | -0.77551800 | 0.69191000  |
| O | -2.29767300 | 2.72509000  | -0.02260800 |
| C | -1.62214600 | 0.51609600  | 0.80401500  |
| C | 2.35635200  | -0.80815400 | -0.55454200 |
| C | 2.06684700  | -2.17209100 | -0.87785900 |
| O | -0.56354700 | -0.67533300 | -2.59964700 |
| N | -3.55952600 | 0.79139700  | -0.33765700 |
| N | 0.94735200  | -2.20041300 | -1.69131900 |
| H | 2.36236000  | 1.87766100  | 0.42968700  |
| H | -4.26933200 | 1.22402900  | -0.90703100 |
| H | 0.47534700  | -3.02342400 | -2.03069000 |
| C | 0.44882600  | -0.91424900 | -1.93735500 |

**TS (27)** of Trans isomer (14)

|   |             |             |             |
|---|-------------|-------------|-------------|
| C | -0.80390600 | 3.03530800  | 0.78543500  |
| H | -1.57748200 | 3.18994400  | 0.04505400  |
| N | 0.82853900  | 1.84418500  | -1.42065200 |
| N | -0.82821200 | 1.84461200  | 1.42065000  |
| C | 1.53849200  | 0.72906200  | -1.04777900 |
| C | 0.95473400  | -1.19827000 | -2.75562400 |
| C | 1.26914000  | -2.52189000 | -3.06957900 |
| C | 2.20705900  | -3.23902000 | -2.32081700 |
| C | 2.85105200  | -2.64405600 | -1.23071400 |
| H | 0.22006600  | -0.67716300 | -3.35664900 |
| H | 0.77482200  | -2.99778200 | -3.91128400 |
| H | 2.44215300  | -4.26539300 | -2.58527100 |
| H | 3.58922200  | -3.19134500 | -0.65461200 |
| C | -0.95489700 | -1.19741700 | 2.75654500  |
| C | -1.26960400 | -2.52084700 | 3.07100200  |
| C | -2.20779500 | -3.23800100 | 2.32260400  |
| C | -2.85176600 | -2.64325000 | 1.23237400  |
| H | -0.21998900 | -0.67630600 | 3.35727300  |
| H | -0.77529900 | -2.99657000 | 3.91281000  |
| H | -2.44311900 | -4.26422200 | 2.58744400  |
| H | -3.59015000 | -3.19054200 | 0.65654600  |
| C | -0.29621500 | 4.09821700  | 1.72350600  |
| C | -0.00187400 | 1.86424600  | 2.65415600  |
| C | 0.55335400  | 3.29602000  | 2.73141200  |
| H | 0.27746200  | 4.88010400  | 1.21641000  |



|   |             |             |             |
|---|-------------|-------------|-------------|
| H | -1.14524700 | 4.59593700  | 2.21417200  |
| H | -0.64728600 | 1.59564400  | 3.49544200  |
| H | 0.80239400  | 1.13133700  | 2.56067100  |
| H | 0.49384400  | 3.70027300  | 3.74428100  |
| H | 1.59977000  | 3.28225100  | 2.42394800  |
| C | 0.29693300  | 4.09778900  | -1.72410600 |
| C | -0.55280500 | 3.29545400  | -2.73175900 |
| C | 0.00225300  | 1.86363900  | -2.65418300 |
| H | 1.14603200  | 4.59523500  | -2.21493500 |
| H | -0.27661000 | 4.87990600  | -1.21721100 |
| H | -1.59919800 | 3.28187500  | -2.42420500 |
| H | -0.49334200 | 3.69945500  | -3.74473100 |
| H | -0.80209800 | 1.13083600  | -2.56058100 |
| H | 0.64769300  | 1.59480600  | -3.49537600 |
| C | 0.80450000  | 3.03505700  | -0.78576500 |
| C | -2.43762400 | 0.72754200  | -0.08747300 |
| C | -2.53236400 | -1.32944500 | 0.91614800  |
| C | -1.58578200 | -0.56997600 | 1.66936900  |
| O | -2.69263100 | 1.62370500  | -0.92112700 |
| C | -1.53834300 | 0.72947300  | 1.04807600  |
| C | 1.58565200  | -0.57061400 | -1.66859400 |
| C | 2.53196000  | -1.33005600 | -0.91499200 |
| O | 2.69313500  | 1.62393200  | 0.92089200  |
| N | -3.02104900 | -0.54215900 | -0.12176500 |
| N | 3.02069800  | -0.54253100 | 0.12271700  |
| H | 1.57812100  | 3.18971400  | -0.04543300 |
| C | 2.43777100  | 0.72737500  | 0.08776500  |
| C | -3.94955500 | -0.95051300 | -1.16288500 |
| H | -3.65776000 | -1.94036700 | -1.53076500 |
| H | -3.80747000 | -0.23129600 | -1.97538400 |
| C | -5.40605700 | -0.95916200 | -0.73161200 |
| C | -6.17298900 | -2.12501800 | -0.80847500 |
| C | -6.00786400 | 0.22041300  | -0.27178400 |
| C | -7.51749000 | -2.12070600 | -0.42880200 |
| H | -5.71749000 | -3.04400800 | -1.17067800 |
| C | -7.34768700 | 0.22618000  | 0.11039100  |
| H | -5.41755400 | 1.13136200  | -0.22511600 |
| C | -8.10673600 | -0.94509700 | 0.03403400  |
| H | -8.09996400 | -3.03546100 | -0.49195900 |
| H | -7.80374700 | 1.14644600  | 0.46454700  |
| H | -9.15112200 | -0.93867800 | 0.33236500  |
| C | 3.94989400  | -0.95035300 | 1.16342800  |
| H | 3.65837400  | -1.94003500 | 1.53198200  |
| H | 3.80830100  | -0.23074800 | 1.97566800  |
| C | 5.40611300  | -0.95917400 | 0.73120700  |
| C | 6.00771700  | 0.22031500  | 0.27089100  |
| C | 6.17299400  | -2.12509000 | 0.80765200  |
| C | 7.34728100  | 0.22593100  | -0.11218900 |
| H | 5.41746700  | 1.13132100  | 0.22457000  |
| C | 7.51723900  | -2.12093100 | 0.42707300  |
| H | 5.71765500  | -3.04400600 | 1.17024700  |
| C | 8.10627500  | -0.94541000 | -0.03625500 |
| H | 7.80319000  | 1.14612900  | -0.46671500 |
| H | 8.09967600  | -3.03573100 | 0.48991200  |
| H | 9.15046100  | -0.93910600 | -0.33528700 |

**TS (28)** of Cis isomer (15)

|   |             |            |             |
|---|-------------|------------|-------------|
| C | -1.01115200 | 3.27774600 | 0.47579600  |
| H | -1.81138800 | 3.25680300 | -0.25299600 |
| N | 0.82398900  | 2.29556500 | -1.54817400 |
| N | -0.82348600 | 2.12605500 | 1.16787600  |
| C | 1.64896100  | 1.39658700 | -0.93142600 |
| C | 3.41089700  | 2.75358500 | 0.47771700  |

|   |             |             |             |
|---|-------------|-------------|-------------|
| C | 4.47809000  | 2.58676200  | 1.36619500  |
| C | 4.87576200  | 1.31206900  | 1.77902500  |
| C | 4.22533600  | 0.16813500  | 1.29787600  |
| H | 3.14692900  | 3.75457500  | 0.15171700  |
| H | 5.00468500  | 3.46194500  | 1.73515900  |
| H | 5.70358500  | 1.20187900  | 2.47279800  |
| H | 4.55217700  | -0.82308300 | 1.59255100  |
| C | -0.45432900 | -0.80993500 | 2.69180800  |
| C | -0.54810800 | -2.14617900 | 3.08779600  |
| C | -1.37318400 | -3.04507300 | 2.40407600  |
| C | -2.12512500 | -2.62368800 | 1.30257300  |
| H | 0.19793000  | -0.14623500 | 3.24586400  |
| H | 0.02693900  | -2.48624600 | 3.94405500  |
| H | -1.43776400 | -4.07832000 | 2.73124400  |
| C | -0.71529100 | 4.44717600  | 1.37974100  |
| C | -0.03340800 | 2.35342300  | 2.40579900  |
| C | 0.29600500  | 3.85415700  | 2.38153700  |
| H | -0.32688000 | 5.32102900  | 0.84734200  |
| H | -1.63520700 | 4.76904600  | 1.88947400  |
| H | -0.65520100 | 2.06254700  | 3.25819400  |
| H | 0.86159200  | 1.72802800  | 2.39172500  |
| H | 0.22121500  | 4.30208500  | 3.37476000  |
| H | 1.32092500  | 3.99799100  | 2.02923500  |
| C | -0.17182000 | 4.32612900  | -2.20976700 |
| C | -0.23973300 | 3.32197000  | -3.38791100 |
| C | -0.01003400 | 1.95320200  | -2.73524700 |
| H | 0.37438900  | 5.23832400  | -2.47460800 |
| H | -1.17178400 | 4.64109600  | -1.88843200 |
| H | -1.19556900 | 3.35712400  | -3.91526800 |
| H | 0.55368200  | 3.53848900  | -4.11028100 |
| H | -0.94904600 | 1.51041900  | -2.38936700 |
| H | 0.51875700  | 1.22948200  | -3.35179900 |
| C | 0.53751300  | 3.54433700  | -1.12639300 |
| C | -2.27870900 | 0.68141200  | -0.21232900 |
| C | -2.02746900 | -1.29607500 | 0.90554400  |
| C | -1.19591400 | -0.35483900 | 1.58812900  |
| O | -2.68553200 | 1.48172900  | -1.08066900 |
| C | -1.36676800 | 0.89543400  | 0.89218800  |
| C | 2.72707100  | 1.62739600  | -0.00905800 |
| C | 3.16750600  | 0.33337800  | 0.41291900  |
| O | 0.55574600  | -0.65825700 | -1.65667400 |
| N | -2.66342900 | -0.65967100 | -0.15152300 |
| N | 2.39143000  | -0.63748800 | -0.21068500 |
| H | 1.21439800  | 4.01076200  | -0.42675500 |
| C | 1.42802700  | -0.03718600 | -1.03929300 |
| C | 2.38929800  | -2.06237000 | 0.07105900  |
| H | 1.48254000  | -2.44190600 | -0.41162400 |
| H | -2.77777700 | -3.31336900 | 0.77868800  |
| C | -3.47524600 | -1.28662200 | -1.18217300 |
| H | -3.45015400 | -0.59584200 | -2.03007600 |
| H | 2.27473000  | -2.21946200 | 1.15005900  |
| H | -2.99264800 | -2.21909600 | -1.49355800 |
| C | 3.61170100  | -2.80501300 | -0.43981700 |
| C | 4.29366800  | -3.70291000 | 0.38772300  |
| C | 4.05442300  | -2.63237500 | -1.75770100 |
| C | 5.39601100  | -4.41702400 | -0.08746000 |
| H | 3.95845200  | -3.84590300 | 1.41254500  |
| C | 5.15616300  | -3.34077400 | -2.23357000 |
| H | 3.52952800  | -1.93817800 | -2.40772000 |
| C | 5.83122100  | -4.23614800 | -1.39974500 |
| H | 5.91541200  | -5.10891800 | 0.56958800  |
| H | 5.48862400  | -3.19613400 | -3.25768800 |
| H | 6.69040800  | -4.78685100 | -1.77155800 |

|   |             |             |             |
|---|-------------|-------------|-------------|
| C | -4.91292300 | -1.54450900 | -0.76645900 |
| C | -5.73166700 | -0.47513500 | -0.37757900 |
| C | -5.44968400 | -2.83488000 | -0.78553900 |
| C | -7.05636600 | -0.69761700 | -0.00781400 |
| H | -5.32037400 | 0.53059700  | -0.37539700 |
| C | -6.77854700 | -3.06026100 | -0.41748300 |
| H | -4.82570200 | -3.67080600 | -1.09374800 |
| C | -7.58384000 | -1.99205300 | -0.02521500 |
| H | -7.68139500 | 0.13943700  | 0.29064100  |
| H | -7.18057900 | -4.06932600 | -0.43519300 |
| H | -8.61668900 | -2.16436600 | 0.26357100  |

**TS (25)** of Trans isomer (19)

|   |             |             |             |
|---|-------------|-------------|-------------|
| C | 0.10697400  | 0.57407600  | 1.99359200  |
| H | 0.05307100  | 1.64647900  | 1.88957000  |
| N | 0.72925500  | 0.95030600  | -0.73798300 |
| N | -0.79801000 | -0.18629600 | 1.42376700  |
| C | -0.57626500 | 0.68792300  | -1.08843100 |
| C | 3.98922500  | 1.24490600  | -0.09437500 |
| C | 5.35952400  | 1.03914300  | 0.07906300  |
| C | 5.93647800  | -0.22449400 | -0.09324100 |
| C | 5.13728700  | -1.31908600 | -0.44045700 |
| H | 3.58936200  | 2.24234100  | 0.04899000  |
| H | 5.98794000  | 1.88221300  | 0.35326300  |
| H | 7.00503900  | -0.35940900 | 0.04377600  |
| H | 5.56916100  | -2.30778300 | -0.57313900 |
| C | -2.82666500 | -1.84062100 | -0.62653600 |
| C | -4.03217500 | -2.35624500 | -1.11880300 |
| C | -5.21240300 | -1.61216700 | -1.05177300 |
| C | -5.22077400 | -0.32371800 | -0.50409100 |
| H | -1.90196400 | -2.39751900 | -0.73497900 |
| H | -4.04319600 | -3.34273000 | -1.57136800 |
| H | -6.13617300 | -2.02822700 | -1.44234300 |
| H | -6.13124600 | 0.26703500  | -0.47236900 |
| C | 1.13182500  | -0.23017100 | 2.70943300  |
| C | -0.56958800 | -1.63558700 | 1.68592500  |
| C | 0.46068900  | -1.61771100 | 2.82813500  |
| H | 2.02287600  | -0.27005300 | 2.06102700  |
| H | 1.43721800  | 0.20403600  | 3.66530800  |
| H | -1.52124300 | -2.09784100 | 1.95425200  |
| H | -0.19443800 | -2.09001600 | 0.75997300  |
| H | -0.04258500 | -1.70907800 | 3.79562700  |
| H | 1.17531700  | -2.43751400 | 2.73851100  |
| C | 1.07235800  | 2.38090700  | -0.92579100 |
| C | -0.26547400 | 3.06083100  | -1.24495900 |
| C | -1.11697700 | 1.90899700  | -1.80919300 |
| H | 1.78514100  | 2.45235800  | -1.75575300 |
| H | 1.55235000  | 2.79256500  | -0.03522600 |
| H | -0.71974600 | 3.45717600  | -0.33491300 |
| H | -0.14028800 | 3.88348900  | -1.95302100 |
| H | -2.19204300 | 2.05485800  | -1.68252800 |
| H | -0.93121400 | 1.77983600  | -2.88378400 |
| C | 1.75320700  | -0.02800500 | -0.72162900 |
| C | -2.43564400 | 1.55394100  | 0.93323200  |
| C | -4.02327900 | 0.17083900  | -0.00606900 |
| C | -2.82661800 | -0.57757500 | -0.03230300 |
| O | -1.96107500 | 2.51440800  | 1.53402400  |
| C | -1.73683200 | 0.29365700  | 0.47768600  |
| C | 3.15403200  | 0.16711100  | -0.45194900 |
| C | 3.77379100  | -1.11731300 | -0.60885700 |
| O | 0.46357000  | -2.05704900 | -1.23042200 |
| N | -3.75874700 | 1.42418700  | 0.55794900  |

|   |             |             |             |
|---|-------------|-------------|-------------|
| N | 2.78106800  | -2.02620900 | -0.91944400 |
| H | -4.44000600 | 2.14091400  | 0.75824600  |
| H | 2.90540600  | -3.00364700 | -1.12830400 |
| C | 1.52317500  | -1.40882400 | -1.00187600 |
| H | -0.71887100 | -0.29716600 | -1.52004700 |

**TS (26)** of Trans isomer (20)

|   |             |             |             |
|---|-------------|-------------|-------------|
| C | 0.50532200  | -0.00889300 | 1.61070300  |
| H | 0.39398900  | 1.04704300  | 1.38775800  |
| N | 0.74403000  | -1.03317400 | -1.09192700 |
| N | -0.61912500 | -0.75761400 | 1.58914900  |
| C | 0.48359100  | -2.32122100 | -0.97721200 |
| C | 1.18518900  | 2.25329700  | -0.87042300 |
| C | 1.82457000  | 3.49628200  | -0.96488400 |
| C | 3.18156500  | 3.62653600  | -0.66282500 |
| C | 3.93355300  | 2.52044200  | -0.24769000 |
| H | 0.11944700  | 2.17886200  | -1.06417900 |
| H | 1.25208000  | 4.36856300  | -1.26410300 |
| H | 3.66086800  | 4.59798300  | -0.73559600 |
| H | 4.98372200  | 2.62240200  | 0.00940300  |
| C | -2.49935600 | 1.97160600  | 1.26781300  |
| C | -3.46490700 | 2.91361700  | 0.90749700  |
| C | -4.45565600 | 2.61206100  | -0.03689700 |
| C | -4.49945600 | 1.35361100  | -0.64730000 |
| H | -1.75176300 | 2.21807500  | 2.01706700  |
| H | -3.44984900 | 3.89594600  | 1.37153400  |
| H | -5.19686800 | 3.36037300  | -0.30096100 |
| H | -5.26616800 | 1.11523500  | -1.37998300 |
| C | 1.34353900  | -0.45841700 | 2.79013000  |
| C | -0.53183900 | -1.95160700 | 2.46114000  |
| C | 0.92487000  | -1.93620700 | 2.95191300  |
| H | 2.41564600  | -0.31958800 | 2.64338200  |
| H | 1.05431900  | 0.13464600  | 3.66878000  |
| H | -1.24886400 | -1.82475300 | 3.28229100  |
| H | -0.81397000 | -2.84241600 | 1.89625000  |
| H | 1.01706500  | -2.29167200 | 3.98081000  |
| H | 1.55855000  | -2.56110700 | 2.31743200  |
| C | 0.37555500  | -0.52589500 | -2.44784700 |
| C | -0.38030400 | -1.70367200 | -3.08194500 |
| C | 0.11143200  | -2.93029700 | -2.28876400 |
| H | 1.29910600  | -0.26979700 | -2.97743800 |
| H | -0.23011700 | 0.37488400  | -2.35682000 |
| H | -1.45352000 | -1.58213400 | -2.92517700 |
| H | -0.18716200 | -1.77731400 | -4.15427500 |
| H | -0.63681900 | -3.71369400 | -2.18095900 |
| H | 1.01682600  | -3.36579100 | -2.74016400 |
| C | 1.56028200  | -0.26887400 | -0.19480100 |
| C | -2.25152200 | -1.47824000 | -0.08633600 |
| C | -3.53335300 | 0.41759200  | -0.29695000 |
| C | -2.52150700 | 0.69988100  | 0.67380200  |
| O | -1.80268400 | -2.62992600 | -0.34975400 |
| C | -1.74828700 | -0.50145000 | 0.80149000  |
| C | 1.92704000  | 1.12724000  | -0.50708500 |
| C | 3.29353400  | 1.29064600  | -0.17515800 |
| O | 3.05698700  | -2.14310400 | 0.33879100  |
| N | -3.33258700 | -0.87620200 | -0.75911700 |
| N | 3.80393900  | 0.05557800  | 0.23236700  |
| H | -3.97656500 | -1.40374200 | -1.32714100 |
| H | 4.76920400  | -0.14549700 | 0.44581400  |
| C | 2.84610700  | -0.94688700 | 0.15190100  |
| H | 0.80285400  | -2.85930200 | -0.10096400 |

Calculated Frequencies of all transition States.

**TS (23)** (for trans)

|           |           |           |           |           |           |
|-----------|-----------|-----------|-----------|-----------|-----------|
| -273.5210 | 16.7812   | 21.5171   | 28.0202   | 55.0594   | 71.3282   |
| 97.9190   | 118.1272  | 123.9245  | 139.8885  | 148.2703  | 148.7163  |
| 156.1275  | 158.7393  | 171.8830  | 176.3821  | 211.8504  | 221.6071  |
| 272.5999  | 287.7428  | 299.9343  | 314.7284  | 331.3894  | 336.4687  |
| 338.9177  | 361.1117  | 396.4641  | 411.6133  | 415.8223  | 417.8035  |
| 470.8184  | 473.8001  | 507.1494  | 509.5714  | 515.9536  | 526.8122  |
| 578.5450  | 581.3021  | 622.3221  | 622.8769  | 637.6779  | 638.5226  |
| 663.1618  | 671.7099  | 695.2484  | 696.8119  | 728.9153  | 729.0120  |
| 746.6238  | 746.9468  | 751.5886  | 752.7519  | 817.9322  | 827.2309  |
| 842.9429  | 844.8930  | 850.5322  | 852.1674  | 882.4455  | 883.0278  |
| 895.6141  | 903.4801  | 905.2828  | 912.7336  | 915.8827  | 928.3867  |
| 938.4933  | 956.1333  | 956.1458  | 958.2024  | 975.1021  | 977.5283  |
| 985.6954  | 994.5759  | 1032.3830 | 1032.8356 | 1058.0291 | 1060.0490 |
| 1067.6578 | 1072.2739 | 1086.9689 | 1102.9358 | 1129.2737 | 1131.8491 |
| 1183.6443 | 1183.7320 | 1191.1707 | 1192.4562 | 1210.9224 | 1214.3954 |
| 1223.7666 | 1229.7361 | 1242.6614 | 1247.2079 | 1262.6394 | 1263.1457 |
| 1270.9050 | 1272.9742 | 1299.5211 | 1311.5820 | 1326.6063 | 1331.2663 |
| 1334.1369 | 1335.7998 | 1345.9760 | 1346.2720 | 1361.0047 | 1362.6994 |
| 1390.8367 | 1392.0503 | 1419.9580 | 1430.4639 | 1432.1847 | 1437.9124 |
| 1492.7138 | 1500.3889 | 1502.2064 | 1504.2917 | 1506.9852 | 1507.6967 |
| 1517.0221 | 1520.1472 | 1524.2331 | 1526.0590 | 1535.9515 | 1567.0573 |
| 1624.8889 | 1627.2878 | 1664.4510 | 1665.2656 | 1701.0962 | 1707.3128 |
| 3016.7644 | 3016.9777 | 3072.6777 | 3072.7755 | 3084.3024 | 3088.1395 |
| 3097.6271 | 3097.8575 | 3130.5217 | 3130.5943 | 3155.4144 | 3155.4816 |

**TS (24)** (for cis)

|           |           |           |           |           |           |
|-----------|-----------|-----------|-----------|-----------|-----------|
| -286.0436 | 20.3669   | 23.4788   | 29.8478   | 44.1424   | 61.4491   |
| 97.6694   | 112.7431  | 119.8562  | 128.9163  | 130.8805  | 142.0166  |
| 151.8457  | 154.9380  | 167.2829  | 188.2210  | 225.5370  | 245.8322  |
| 272.0277  | 286.9929  | 294.8717  | 311.4067  | 322.6216  | 331.2808  |
| 351.0681  | 377.6563  | 391.1838  | 408.0607  | 417.1049  | 421.0339  |
| 464.9449  | 474.2467  | 508.1094  | 508.6899  | 511.2081  | 531.6222  |
| 578.1283  | 583.2407  | 622.5121  | 624.4704  | 637.7146  | 640.4726  |
| 646.9815  | 664.7954  | 694.2998  | 696.4998  | 726.2915  | 726.9480  |
| 744.6522  | 747.2015  | 749.6864  | 752.8111  | 809.1365  | 817.8457  |
| 843.7687  | 847.7392  | 852.0564  | 854.7866  | 874.6349  | 883.5975  |
| 884.6419  | 898.2772  | 902.1890  | 903.9847  | 913.0640  | 921.1748  |
| 928.7335  | 942.2643  | 952.4981  | 954.4391  | 958.5867  | 980.6338  |
| 983.7854  | 988.9196  | 1030.2015 | 1031.5053 | 1051.8488 | 1058.1888 |
| 1068.2771 | 1077.9380 | 1087.2116 | 1105.2137 | 1124.4268 | 1129.6701 |
| 1178.2377 | 1182.7253 | 1186.6986 | 1188.2940 | 1200.9188 | 1212.3783 |
| 1219.1183 | 1225.8449 | 1237.9980 | 1243.5176 | 1254.4496 | 1257.2322 |
| 1262.4331 | 1272.5065 | 1294.6101 | 1305.4315 | 1321.6868 | 1328.4007 |
| 1329.7757 | 1334.1538 | 1344.1224 | 1348.1127 | 1361.4216 | 1367.1126 |
| 1386.4181 | 1389.6377 | 1420.5167 | 1430.0902 | 1432.8467 | 1449.7681 |
| 1494.7514 | 1500.9932 | 1504.3210 | 1508.1953 | 1511.5768 | 1515.4544 |
| 1517.4598 | 1520.7299 | 1530.5657 | 1532.1613 | 1534.5956 | 1569.6392 |
| 1620.7706 | 1627.7679 | 1660.5521 | 1665.0911 | 1714.4372 | 1748.4163 |
| 3013.4217 | 3020.0511 | 3063.5061 | 3070.4840 | 3079.5266 | 3089.3201 |

**TS (25)** (for trans)

|           |          |          |          |          |          |
|-----------|----------|----------|----------|----------|----------|
| -290.6099 | 25.8048  | 32.9729  | 61.4618  | 67.3016  | 84.2856  |
| 93.2674   | 109.6014 | 131.4012 | 138.8484 | 145.3183 | 149.1035 |
| 153.9191  | 172.4875 | 188.5140 | 223.5047 | 236.9043 | 246.4561 |
| 277.3956  | 287.9294 | 300.3394 | 309.6289 | 323.6427 | 339.1967 |
| 349.8144  | 373.4382 | 397.6496 | 403.9914 | 424.8494 | 448.6477 |
| 465.4622  | 499.1369 | 502.0293 | 512.6868 | 519.1287 | 539.5461 |
| 578.0621  | 585.3727 | 613.3778 | 624.1219 | 632.3814 | 642.9948 |
| 653.2232  | 656.7136 | 691.2690 | 693.7781 | 715.8605 | 737.6346 |
| 740.9942  | 752.0213 | 766.2560 | 772.5832 | 791.0854 | 823.0191 |
| 823.9062  | 830.9562 | 850.6854 | 869.6039 | 872.6486 | 878.2660 |

|           |           |           |           |           |           |
|-----------|-----------|-----------|-----------|-----------|-----------|
| 887.3782  | 888.7148  | 902.2919  | 918.4282  | 928.5594  | 933.0503  |
| 939.6111  | 943.8857  | 951.8523  | 969.6851  | 971.1658  | 987.7394  |
| 988.8934  | 1014.3139 | 1023.1774 | 1051.4096 | 1054.9577 | 1057.9329 |
| 1066.6231 | 1089.0344 | 1095.6984 | 1124.7757 | 1130.8040 | 1169.8260 |
| 1180.1052 | 1182.3572 | 1185.2723 | 1191.8124 | 1196.8836 | 1205.0358 |
| 1222.5514 | 1237.0706 | 1238.9556 | 1244.6431 | 1256.1047 | 1260.8227 |
| 1266.5594 | 1274.9706 | 1300.2421 | 1315.5664 | 1322.1589 | 1326.0838 |
| 1333.9482 | 1337.2754 | 1350.1994 | 1353.0229 | 1355.3411 | 1362.6640 |
| 1365.7297 | 1387.2741 | 1398.2609 | 1408.1383 | 1424.2611 | 1428.9370 |
| 1471.4248 | 1474.0178 | 1504.8630 | 1509.1536 | 1512.0921 | 1513.5836 |
| 1514.8074 | 1519.8905 | 1522.0352 | 1539.0961 | 1546.3792 | 1611.5261 |
| 1617.3858 | 1638.1604 | 1647.0370 | 1669.6579 | 1674.7843 | 1769.9676 |
| 2997.5281 | 3026.4856 | 3038.7291 | 3051.3761 | 3075.4339 | 3092.1760 |
| 3108.9228 | 3109.6062 | 3119.5025 | 3130.4244 | 3142.4183 | 3144.9504 |
| 3170.4962 | 3177.3011 | 3185.3225 | 3191.4746 | 3196.5900 | 3198.1793 |
| 3206.9900 | 3212.3168 | 3216.4754 | 3293.8235 | 3659.9442 | 3678.5951 |

**TS (26)** (for cis)

|           |           |           |           |           |           |
|-----------|-----------|-----------|-----------|-----------|-----------|
| -231.5941 | 19.9462   | 30.1330   | 62.1285   | 68.6062   | 79.5589   |
| 95.1030   | 100.0289  | 113.6564  | 129.1048  | 139.1856  | 147.7944  |
| 164.3472  | 179.3983  | 202.0890  | 212.4311  | 230.4641  | 241.7138  |
| 269.9468  | 283.1305  | 298.4135  | 309.7850  | 313.9195  | 328.9554  |
| 374.0125  | 387.5933  | 392.2146  | 410.3033  | 431.6060  | 444.3789  |
| 461.9929  | 482.7149  | 490.5809  | 504.9329  | 519.7999  | 533.5732  |
| 583.8449  | 586.3183  | 615.3485  | 624.2073  | 632.1056  | 641.1121  |
| 649.0888  | 656.6078  | 692.5378  | 699.4762  | 727.8051  | 746.7738  |
| 750.8295  | 754.0461  | 764.3830  | 779.5150  | 802.8107  | 830.5053  |
| 843.7090  | 844.7547  | 860.4908  | 863.5256  | 867.9558  | 876.0761  |
| 887.1504  | 895.5841  | 897.6589  | 904.2351  | 922.2020  | 931.4082  |
| 937.8647  | 947.7327  | 949.9896  | 956.8417  | 968.3337  | 973.1343  |
| 979.3994  | 1008.6567 | 1024.2953 | 1041.8110 | 1050.8702 | 1053.6240 |
| 1061.3741 | 1078.1605 | 1091.5072 | 1120.0879 | 1129.2965 | 1135.4179 |
| 1173.8007 | 1174.0052 | 1181.0379 | 1186.5944 | 1195.5227 | 1201.7098 |
| 1215.2862 | 1232.7127 | 1237.7813 | 1239.7150 | 1252.0060 | 1253.4633 |
| 1261.7391 | 1263.6892 | 1306.6245 | 1312.4463 | 1320.9267 | 1323.2166 |
| 1328.8128 | 1335.6960 | 1338.4346 | 1341.9311 | 1343.7581 | 1357.0036 |
| 1359.0476 | 1378.1751 | 1387.1507 | 1417.4176 | 1426.8556 | 1457.0360 |
| 1479.2224 | 1494.4633 | 1501.8624 | 1504.1544 | 1509.2236 | 1517.6774 |
| 1518.9043 | 1521.1165 | 1522.2917 | 1532.7137 | 1547.1296 | 1593.2116 |
| 1623.8350 | 1636.2508 | 1642.0312 | 1667.5758 | 1669.1077 | 1768.4865 |
| 3004.5464 | 3032.3654 | 3039.7570 | 3072.7700 | 3086.4842 | 3096.5233 |
| 3124.0405 | 3133.6936 | 3139.8745 | 3145.5389 | 3160.1502 | 3165.4259 |
| 3168.8718 | 3175.3077 | 3184.2507 | 3185.6093 | 3188.8830 | 3192.3603 |
| 3200.6433 | 3201.0611 | 3211.2913 | 3320.3881 | 3659.9485 | 3669.5449 |

**TS (27)** (for trans)

|           |          |          |          |          |          |
|-----------|----------|----------|----------|----------|----------|
| -277.6864 | 8.8356   | 12.6617  | 14.2170  | 15.0002  | 20.7821  |
| 30.9645   | 31.4815  | 37.8156  | 38.2811  | 54.1966  | 60.0013  |
| 101.4811  | 113.4659 | 123.2104 | 136.2918 | 137.8538 | 143.1656 |
| 151.3424  | 156.2323 | 160.0322 | 162.1721 | 171.2017 | 177.4997 |
| 183.8958  | 185.5575 | 219.1516 | 232.5365 | 238.8035 | 242.4850 |
| 301.6907  | 308.4649 | 308.6893 | 321.1103 | 339.2621 | 342.1055 |
| 347.7540  | 356.9221 | 364.0044 | 376.4196 | 414.8756 | 416.9249 |
| 416.9362  | 421.7709 | 454.0897 | 457.7440 | 473.8914 | 473.9790 |
| 507.4023  | 508.9362 | 515.3823 | 523.2488 | 564.5789 | 566.0068 |
| 575.8024  | 579.4680 | 627.5242 | 628.6109 | 634.8278 | 635.1135 |
| 660.1960  | 662.3231 | 681.0128 | 681.2891 | 702.3794 | 705.5646 |
| 715.9919  | 716.0468 | 727.3290 | 728.2356 | 745.2537 | 745.3887 |
| 747.7925  | 750.1321 | 751.5214 | 753.1671 | 794.2613 | 799.3131 |
| 826.6938  | 827.0424 | 833.4646 | 843.7648 | 849.0589 | 850.2507 |
| 855.8407  | 858.0883 | 865.5091 | 865.5165 | 897.5994 | 903.5562 |
| 907.3500  | 915.7544 | 915.9689 | 923.6523 | 924.7083 | 931.0464 |
| 933.8217  | 939.7808 | 952.3635 | 956.5712 | 956.7710 | 964.0009 |

|           |           |           |           |           |           |
|-----------|-----------|-----------|-----------|-----------|-----------|
| 977.4234  | 977.5680  | 977.5772  | 995.0039  | 1000.9942 | 1001.0662 |
| 1010.1047 | 1010.6229 | 1017.0617 | 1017.0876 | 1041.2622 | 1041.4473 |
| 1055.0978 | 1055.8634 | 1057.1694 | 1061.3641 | 1070.2498 | 1070.5881 |
| 1084.2039 | 1099.9092 | 1101.9569 | 1105.8383 | 1119.8816 | 1121.1577 |
| 1141.9237 | 1144.2784 | 1185.6271 | 1185.9578 | 1186.9881 | 1186.9977 |
| 1191.1317 | 1192.7951 | 1202.9692 | 1208.2137 | 1208.3009 | 1210.3568 |
| 1223.2826 | 1224.4232 | 1233.2997 | 1235.0554 | 1248.3962 | 1252.4063 |
| 1262.1117 | 1262.3630 | 1299.6003 | 1304.8392 | 1312.3532 | 1315.1794 |
| 1326.9415 | 1333.3223 | 1340.9158 | 1341.4166 | 1348.5531 | 1350.4681 |
| 1363.7090 | 1363.7112 | 1366.7193 | 1369.1260 | 1375.3487 | 1376.1594 |
| 1387.1161 | 1387.7773 | 1394.2462 | 1396.6298 | 1424.3569 | 1428.5809 |
| 1430.9236 | 1442.3797 | 1480.9302 | 1484.0346 | 1494.8155 | 1497.6599 |
| 1497.7841 | 1501.1565 | 1504.2169 | 1505.3214 | 1508.1659 | 1509.4493 |
| 1513.0444 | 1515.6234 | 1524.0025 | 1525.9721 | 1530.8603 | 1540.1724 |
| 1540.4685 | 1566.2320 | 1626.0946 | 1627.7952 | 1643.1945 | 1643.2373 |
| 1654.2611 | 1657.3791 | 1663.1223 | 1663.1682 | 1671.0664 | 1675.8974 |
| 3016.9996 | 3017.1420 | 3052.2383 | 3052.2808 | 3073.3332 | 3073.4317 |
| 3087.3174 | 3090.4707 | 3098.1793 | 3098.4368 | 3106.5477 | 3106.5697 |
| 3131.9462 | 3132.0132 | 3154.8200 | 3154.8842 | 3166.7627 | 3166.7745 |
| 3178.0796 | 3178.0812 | 3181.9828 | 3182.0477 | 3188.0594 | 3188.0628 |
| 3196.8988 | 3196.9068 | 3197.1836 | 3197.1917 | 3205.2693 | 3205.3036 |
| 3212.3766 | 3212.4927 | 3226.0671 | 3226.0821 | 3237.9724 | 3238.9766 |

**TS (28)** (for Cis)

|           |           |           |           |           |           |
|-----------|-----------|-----------|-----------|-----------|-----------|
| -295.4323 | 8.9909    | 11.2650   | 17.8819   | 19.1680   | 23.1030   |
| 28.9370   | 38.9192   | 40.8738   | 44.5151   | 48.9849   | 55.7018   |
| 88.8682   | 100.7769  | 113.7060  | 119.5800  | 132.3747  | 139.9055  |
| 145.9182  | 157.8358  | 162.1372  | 165.1496  | 177.3232  | 180.3322  |
| 192.0472  | 204.0297  | 227.2275  | 235.0843  | 242.3340  | 257.5340  |
| 288.7489  | 308.1762  | 309.9559  | 319.6149  | 330.3257  | 336.4764  |
| 346.3110  | 355.6514  | 365.5902  | 392.6816  | 412.6333  | 416.6799  |
| 417.7141  | 419.9239  | 455.4356  | 460.3561  | 472.8326  | 474.4871  |
| 508.5691  | 510.1703  | 521.8926  | 536.8391  | 565.2871  | 566.9700  |
| 577.1185  | 584.3143  | 623.1615  | 628.3982  | 634.3423  | 635.1011  |
| 644.3598  | 650.9261  | 682.3207  | 685.5118  | 704.0929  | 709.5389  |
| 714.0504  | 717.1718  | 727.9215  | 731.6763  | 744.3824  | 744.7837  |
| 748.1113  | 750.2585  | 752.0151  | 752.9833  | 788.4298  | 796.4878  |
| 817.7019  | 826.9705  | 831.0224  | 841.0884  | 846.6216  | 850.7069  |
| 858.5948  | 861.3918  | 865.2126  | 866.3496  | 876.6032  | 898.1128  |
| 903.2815  | 908.4208  | 914.6942  | 919.4502  | 923.1819  | 924.4463  |
| 931.2548  | 936.7943  | 945.7546  | 954.0607  | 956.4482  | 961.0522  |
| 963.7374  | 972.4922  | 978.0468  | 982.5677  | 994.9751  | 998.0171  |
| 1000.5296 | 1011.4327 | 1016.6137 | 1017.1726 | 1040.7180 | 1042.2571 |
| 1053.0757 | 1055.0118 | 1056.0332 | 1057.1905 | 1068.8097 | 1071.7751 |
| 1089.4127 | 1100.7467 | 1105.3091 | 1108.2467 | 1119.0488 | 1121.5148 |
| 1142.6424 | 1144.6236 | 1184.4823 | 1186.2935 | 1186.5883 | 1186.7748 |
| 1189.4371 | 1196.6612 | 1206.3408 | 1206.8337 | 1208.4479 | 1210.3014 |
| 1221.8892 | 1225.3490 | 1230.0542 | 1232.5977 | 1244.9074 | 1248.7055 |
| 1262.2751 | 1269.4182 | 1292.5641 | 1304.1203 | 1311.5591 | 1316.3837 |
| 1324.3255 | 1327.7638 | 1336.6009 | 1341.0440 | 1347.4911 | 1348.9644 |
| 1362.4597 | 1363.8510 | 1366.6079 | 1369.9232 | 1373.3435 | 1376.9330 |
| 1384.3147 | 1387.6167 | 1393.8381 | 1396.9397 | 1426.0971 | 1429.8932 |
| 1436.0376 | 1445.8328 | 1482.6708 | 1484.6073 | 1494.5700 | 1496.6240 |
| 1497.4058 | 1500.0765 | 1504.5549 | 1507.8086 | 1510.0354 | 1511.8960 |
| 1514.8995 | 1515.5261 | 1522.6223 | 1524.8762 | 1534.0139 | 1540.1734 |
| 1540.4434 | 1568.4767 | 1622.5072 | 1625.3369 | 1642.8123 | 1642.9761 |
| 1650.8701 | 1654.5489 | 1662.9044 | 1663.3348 | 1675.6494 | 1724.5365 |
| 3016.1170 | 3045.2964 | 3046.2068 | 3058.8041 | 3066.1165 | 3070.4942 |
| 3079.3337 | 3081.6127 | 3082.9233 | 3091.1078 | 3099.1682 | 3112.2682 |
| 3125.6529 | 3129.8772 | 3138.7131 | 3167.6443 | 3168.1547 | 3177.4362 |
| 3178.5300 | 3179.3201 | 3179.4435 | 3181.0635 | 3187.3750 | 3188.0799 |
| 3191.7867 | 3195.8862 | 3197.0114 | 3197.0952 | 3202.6182 | 3204.7466 |

3205.7546    3214.1158    3215.2407    3226.6628    3228.8958    3262.6154

---

<sup>i</sup> SMART (V 5.628), SAINT (V 6.45a), XPREP, SHELXTL; Bruker AXS Inc. Madison, Wisconsin, USA, **2004**.

<sup>ii</sup> Sheldrick, G. M. Siemens Area Detector Absorption Correction Program, University of Göttingen, Göttingen, Germany, **1994**.

<sup>iii</sup> Altomare, A.; Cascarano, G.; Giacovazzo, C.; Gualaradi, A.; *J. Appl. Cryst.* **1993**, *26*, 343.

<sup>iv</sup> Sheldrick, G. M. SHELXL-97, Program for Crystal Structure Solution and Refinement; University of Göttingen, Göttingen, Germany, **1997**.

<sup>v</sup> Farrugia, L. J. WinGX-A Windows Program for Crystal Structure Analysis, *J. Appl. Cryst.* **1999**, *32*, 837.

<sup>vi</sup> A. L. Spek, *J. Appl. Crystallogr.* **2003**, *36*, 7.
